# Supplementary material for: Enhanced Immunomodulation in Inflammatory Environments Favors Human Cardiac Mesenchymal Stromal-Like Cells for Allogeneic Cell Therapies
Source: Front Immunol. 2019 Jul 23;10:1716. doi: 10.3389/fimmu.2019.01716 (PMC6665953; doi:10.3389/fimmu.2019.01716)
Supplement: Supplementary file 2 [file Table_3.xlsx]

## Sheet: all_results
ID	Description	GeneRatio	BgRatio	pvalue	p.adjust	qvalue	geneID	Count
GO:0034097	response to cytokine	113/511	802/16792	3.2767e-44	1.94144e-40	1.53143e-41	GCH1, ST3GAL6, STAT1, CD274, BST2, STAT2, OXTR, MX1, PML, SFRP1, NKX3-1, CCL5, RBCK1, CCL8, CCL7, F2RL1, SKIL, COL3A1, IL31RA, ISG15, HLA-G, AIM2, IL1A, JAK2, PARP9, VCAM1, OAS1, PLSCR1, OAS2, KYNU, MX2, COL1A1, CSF1, TNFSF13B, SOCS1, TNFRSF14, XAF1, SPARC, CX3CL1, CXCL5, CXCL11, CXCL6, HLA-F, HLA-E, PSMB10, OAS3, PSMB9, HLA-DPA1, HLA-DPB1, IFI35, GBP2, HLA-DQA1, GBP1, HLA-DQB1, CD24, GBP5, IFI27…	113
GO:0006955	immune response	154/511	1551/16792	6.04618e-42	1.79118e-38	1.4129e-39	GCH1, STAT1, STAT2, CD274, BST2, MX1, PDCD1LG2, TNFSF10, PML, RBCK1, CCL5, CCL8, CCL7, CTSS, F2RL1, APOL1, CADM1, IL31RA, COL3A1, ISG15, HLA-G, AIM2, VNN1, GSDMD, IL1A, TRAFD1, JAK2, PARP9, P2RX7, VCAM1, A2M, OAS1, DLL1, PLSCR1, OAS2, KYNU, MX2, APLN, PDE4B, IFIH1, CSF1, TAP2, TNFSF13B, TAPBP, HERC5, TAP1, SOCS1, TNFRSF14, XAF1, TGFB2, SERINC5, CX3CL1, CXCL5, CXCL11, CXCL6, HLA-F, HLA-E, CFB, PSM…	154
GO:0002376	immune system process	198/511	2465/16792	9.37825e-42	1.8522e-38	1.46103e-39	HES1, STAT1, CD274, STAT2, TNFSF10, SLC7A11, PML, CCL5, RBCK1, FZD7, CCL8, CCL7, SKIL, IL31RA, VNN1, FLT3LG, JAK2, PMAIP1, A2M, DLL1, PLSCR1, MX2, APLN, CSF1, TAP2, TAPBP, HERC5, TAP1, TNFRSF14, TGFB2, SERINC5, CX3CL1, CXCL5, CXCL11, CXCL6, CFB, CD24, C2, GBP5, C1S, C1R, SERPING1, THBD, CASP10, CXCL10, HLA-DOA, IL18BP, UBASH3B, OASL, IDO1, ICAM1, INHBA, BTN3A3, LGALS9, BATF3, DDX60, HLA-C, HLA-B,…	198
GO:0006952	defense response	147/511	1518/16792	1.60739e-38	2.38095e-35	1.87811e-36	PTGFR, GCH1, PTGER2, STAT1, STAT2, BST2, MX1, PML, CCL5, CXADR, APOL3, CCL8, CCL7, CTSS, F2RL1, APOL1, CADM1, IL31RA, ISG15, HLA-G, APOL2, AIM2, VNN1, GSDMD, PTGS1, IL1A, TRAFD1, JAK2, PMAIP1, PARP9, P2RX7, VCAM1, A2M, OAS1, PLSCR1, OAS2, KYNU, MX2, LXN, IFIH1, EDNRB, CSF1, HERC5, TAP1, SOCS1, TNFRSF14, XAF1, SERINC5, CX3CL1, CXCL5, CXCL11, CXCL6, HLA-F, HLA-E, CFB, PSMB10, DDX58, PSMB9, OAS3, HL…	147
GO:0071345	cellular response to cytokine stimulus	98/511	706/16792	1.88176e-37	2.22989e-34	1.75895e-35	ST3GAL6, STAT1, BST2, STAT2, MX1, PML, SFRP1, NKX3-1, CCL5, RBCK1, CCL8, CCL7, F2RL1, IL31RA, ISG15, HLA-G, AIM2, IL1A, JAK2, VCAM1, OAS1, OAS2, MX2, COL1A1, CSF1, TNFSF13B, SOCS1, XAF1, TNFRSF14, CX3CL1, CXCL5, CXCL11, CXCL6, HLA-F, HLA-E, PSMB10, OAS3, PSMB9, HLA-DPA1, IFI35, HLA-DPB1, HLA-DQA1, GBP2, GBP1, HLA-DQB1, GBP5, IFI27, HLA-DRA, IL18BP, CXCL10, OASL, ICAM1, IFIT1, LGALS9, IFIT2, IFIT3…	98
GO:0019221	cytokine-mediated signaling pathway	87/511	554/16792	3.28213e-37	3.24111e-34	2.55661e-35	CXCL10, STAT1, STAT2, BST2, MX1, OASL, PML, ICAM1, IFIT1, CCL5, RBCK1, IFIT2, CCL8, CCL7, IFIT3, HLA-C, CXCR4, HLA-B, F2RL1, HLA-A, CXCL8, IL12RB1, IL31RA, ISG15, HLA-G, AIM2, TRIM21, BGN, CEACAM1, IL1A, IRF9, SAMHD1, TNFRSF1B, CD74, VRK2, JAK2, PSMB8, VCAM1, OAS1, OAS2, CIITA, NMI, MX2, ACKR4, IRF2, CSF1, IFITM1, TNFSF13B, IL15RA, SOCS1, XAF1, TNFRSF14, WNT5A, CX3CL1, TNFRSF10D, CXCL5, CXCL11, C…	87
GO:0045087	innate immune response	101/511	836/16792	1.96802e-33	1.66579e-30	1.31398e-31	GCH1, STAT1, BST2, STAT2, MX1, PML, CCL5, CCL8, CCL7, CTSS, F2RL1, APOL1, CADM1, ISG15, HLA-G, VNN1, AIM2, GSDMD, JAK2, TRAFD1, PARP9, VCAM1, A2M, PLSCR1, OAS1, KYNU, OAS2, MX2, IFIH1, CSF1, HERC5, SOCS1, XAF1, SERINC5, CX3CL1, HLA-F, HLA-E, DDX58, PSMB10, CFB, OAS3, PSMB9, HLA-DPA1, IFI35, HLA-DPB1, GBP2, HLA-DQA1, GBP1, HLA-DQB1, DHX58, GBP5, C2, C1S, IFI27, C1R, SERPING1, HLA-DRA, ZC3HAV1, OAS…	101
GO:0034341	response to interferon-gamma	48/511	161/16792	2.65023e-33	1.96283e-30	1.54829e-31	IRF2, IFITM1, GCH1, STAT1, BST2, OASL, SOCS1, PML, WNT5A, ICAM1, CCL5, LGALS9, CX3CL1, CCL8, CCL7, HLA-C, HLA-B, IRF1, C19orf66, HLA-F, HLA-E, HLA-A, OAS3, IL12RB1, HLA-DPA1, HLA-DPB1, GBP2, HLA-DQA1, HLA-G, GBP1, HLA-DQB1, TRIM21, NUB1, IRF9, JAK2, GBP5, VCAM1, OAS1, KYNU, OAS2, TLR3, CIITA, NMI, CXCL16, B2M, NLRC5, IRF7, HLA-DRA	48
GO:0034340	response to type I interferon	36/511	78/16792	1.27118e-32	8.3686e-30	6.60121e-31	IRF2, IFITM1, STAT1, BST2, STAT2, MX1, OASL, XAF1, WNT5A, IFIT1, IFIT2, IFIT3, HLA-C, HLA-B, IRF1, C19orf66, HLA-F, HLA-E, HLA-A, OAS3, IFI35, ISG15, GBP2, HLA-G, IRF9, SAMHD1, PSMB8, OAS1, OAS2, IFI27, MX2, ISG20, IFI6, NLRC5, IRF7, RSAD2	36
GO:0071357	cellular response to type I interferon	35/511	74/16792	3.68513e-32	2.18344e-29	1.56574e-30	IRF2, IFITM1, STAT1, BST2, STAT2, MX1, OASL, XAF1, WNT5A, IFIT1, IFIT2, IFIT3, HLA-C, HLA-B, IRF1, HLA-F, HLA-E, HLA-A, OAS3, IFI35, ISG15, GBP2, HLA-G, IRF9, SAMHD1, PSMB8, OAS1, OAS2, IFI27, MX2, ISG20, IFI6, NLRC5, IRF7, RSAD2	35
GO:0060337	type I interferon signaling pathway	35/511	74/16792	3.68513e-32	2.18344e-29	1.56574e-30	IRF2, IFITM1, STAT1, BST2, STAT2, MX1, OASL, XAF1, WNT5A, IFIT1, IFIT2, IFIT3, HLA-C, HLA-B, IRF1, HLA-F, HLA-E, HLA-A, OAS3, IFI35, ISG15, GBP2, HLA-G, IRF9, SAMHD1, PSMB8, OAS1, OAS2, IFI27, MX2, ISG20, IFI6, NLRC5, IRF7, RSAD2	35
GO:0002682	regulation of immune system process	126/511	1378/16792	4.7943e-30	2.58239e-27	1.86725e-28	STAT1, HES1, STAT2, CD274, BST2, PDCD1LG2, PML, SFRP1, CCL5, RBCK1, CXADR, CCL8, CCL7, CTSS, RBP1, F2RL1, CADM1, COL3A1, IL31RA, ISG15, HLA-G, VNN1, AIM2, FLT3LG, IL1A, JAK2, TRAFD1, PARP9, VCAM1, A2M, P2RX7, DLL1, PLSCR1, COL1A1, PDE4B, IFIH1, CSF1, TAP2, TNFSF13B, HERC5, TAP1, SOCS1, PDE5A, TNFRSF14, TGFB2, CXCL5, VEGFC, CXCL11, CXCL6, HLA-F, HLA-E, DDX58, CFB, PSMB10, PSMB9, RASSF2, HLA-DPA1, …	126
GO:0051707	response to other organism	95/511	829/16792	1.51629e-29	7.48666e-27	5.06189e-28	IL18BP, CXCL10, PTGFR, GCH1, PTGER2, STAT1, STAT2, BST2, MX1, OASL, ZC3HAV1, IDO1, PML, IFIT5, ICAM1, BATF2, IFIT1, CCL5, LGALS9, CXADR, BATF3, IFIT2, CCL8, DDX60, IFIT3, CXCR4, HLA-B, C19orf66, F2RL1, HLA-A, CXCL8, IL12RB1, IL31RA, ISG15, AIM2, IL12A, GSDMD, IRF9, IFI44L, CASP1, TNFRSF1B, SAMHD1, APOBEC3G, JAK2, PMAIP1, VCAM1, P2RX7, OAS1, PLSCR1, OAS2, MX2, APOBEC3B, CXCL16, PDE4B, IFIH1, EDNRB…	95
GO:0043207	response to external biotic stimulus	95/511	829/16792	1.51629e-29	7.48666e-27	5.06189e-28	IL18BP, CXCL10, PTGFR, GCH1, PTGER2, STAT1, STAT2, BST2, MX1, OASL, ZC3HAV1, IDO1, PML, IFIT5, ICAM1, BATF2, IFIT1, CCL5, LGALS9, CXADR, BATF3, IFIT2, CCL8, DDX60, IFIT3, CXCR4, HLA-B, C19orf66, F2RL1, HLA-A, CXCL8, IL12RB1, IL31RA, ISG15, AIM2, IL12A, GSDMD, IRF9, IFI44L, CASP1, TNFRSF1B, SAMHD1, APOBEC3G, JAK2, PMAIP1, VCAM1, P2RX7, OAS1, PLSCR1, OAS2, MX2, APOBEC3B, CXCL16, PDE4B, IFIH1, EDNRB…	95
GO:0009615	response to virus	58/511	311/16792	1.51794e-28	6.91829e-26	4.72957e-27	CXCL10, STAT1, BST2, STAT2, MX1, ZC3HAV1, OASL, PML, IFIT5, IFIT1, CCL5, CXADR, LGALS9, IFIT2, BATF3, CCL8, DDX60, IFIT3, CXCR4, C19orf66, F2RL1, HLA-A, IL12RB1, ISG15, AIM2, IL12A, IFI44L, IRF9, SAMHD1, APOBEC3G, PMAIP1, PLSCR1, OAS1, OAS2, MX2, APOBEC3B, IFIH1, IFITM1, HERC5, IL15, SERINC5, IFI44, MICB, IRF1, DDX58, OAS3, CD40, GBP1, GBP3, DHX58, CXCL9, CDK6, TLR3, ISG20, B2M, NLRC5, IRF7, RSAD2	58
GO:0009607	response to biotic stimulus	96/511	873/16792	1.79397e-28	7.59234e-26	5.24028e-27	IL18BP, CXCL10, PTGFR, GCH1, PTGER2, STAT1, STAT2, BST2, MX1, OASL, ZC3HAV1, IDO1, PML, IFIT5, ICAM1, BATF2, IFIT1, CCL5, LGALS9, CXADR, BATF3, IFIT2, CCL8, DDX60, IFIT3, CXCR4, HLA-B, C19orf66, F2RL1, HLA-A, CXCL8, IL12RB1, IL31RA, ISG15, AIM2, IL12A, GSDMD, CEACAM1, IRF9, IFI44L, CASP1, TNFRSF1B, SAMHD1, APOBEC3G, JAK2, PMAIP1, VCAM1, P2RX7, OAS1, PLSCR1, OAS2, MX2, APOBEC3B, CXCL16, PDE4B, IFI…	96
GO:0051607	defense response to virus	50/511	229/16792	7.63927e-28	3.01751e-25	2.10021e-26	CXCL10, STAT1, BST2, STAT2, MX1, ZC3HAV1, OASL, PML, IFIT5, IFIT1, CXADR, IFIT2, DDX60, IFIT3, C19orf66, F2RL1, HLA-A, IL12RB1, ISG15, AIM2, IFI44L, IRF9, SAMHD1, APOBEC3G, PMAIP1, PLSCR1, OAS1, OAS2, MX2, APOBEC3B, IFIH1, IFITM1, HERC5, IL15, SERINC5, MICB, IRF1, DDX58, OAS3, CD40, GBP1, GBP3, DHX58, CXCL9, TLR3, ISG20, B2M, NLRC5, IRF7, RSAD2	50
GO:0009605	response to external stimulus	155/511	2073/16792	8.92068e-28	3.30344e-25	2.31625e-26	PTGFR, GCH1, PTGER2, STAT1, STAT2, BST2, MX1, PARVA, PML, NRCAM, SFRP1, ENAH, GLRB, CCL5, CXADR, CCL8, CCL7, RBP1, F2RL1, PLXNC1, IL31RA, COL3A1, ISG15, AIM2, GSDMD, JAK2, PMAIP1, P2RX7, VCAM1, A2M, OAS1, PLSCR1, SEMA3F, OAS2, KYNU, MX2, COL1A1, SEMA6D, LXN, PDE4B, IFIH1, EDNRB, CSF1, ABAT, HERC5, TNFRSF14, SPARC, TGFB2, SERINC5, CX3CL1, CXCL5, VDR, VEGFC, CXCL11, CXCL6, SLC22A3, HLA-E, CFB, DDX5…	155
GO:0071346	cellular response to interferon-gamma	40/511	135/16792	1.31646e-27	4.58824e-25	3.23827e-26	IRF2, STAT1, OASL, PML, WNT5A, ICAM1, CCL5, LGALS9, CX3CL1, CCL8, CCL7, HLA-C, HLA-B, IRF1, HLA-F, HLA-E, HLA-A, OAS3, IL12RB1, HLA-DPA1, HLA-DPB1, GBP2, HLA-DQA1, HLA-G, GBP1, HLA-DQB1, TRIM21, IRF9, JAK2, GBP5, VCAM1, OAS1, OAS2, TLR3, CIITA, NMI, B2M, NLRC5, IRF7, HLA-DRA	40
GO:0010033	response to organic substance	184/511	2822/16792	2.35175e-26	7.74118e-24	5.49567e-25	LRP6, PTGFR, GCH1, PTGER2, STAT1, HES1, ST3GAL6, STAT2, CD274, BST2, MX1, OXTR, TNFSF10, PML, SLC7A11, SFRP1, HHIP, GLRB, NKX3-1, RBCK1, CCL5, ANK2, FZD7, CCL8, CTSS, CCL7, NAMPT, RBP1, F2RL1, SKIL, IL31RA, COL3A1, ISG15, HLA-G, AIM2, IL1A, SVIP, JAK2, PMAIP1, PARP9, P2RX7, VCAM1, DLL1, OAS1, PLSCR1, OAS2, KYNU, MX2, COL1A1, FKBP14, PDE4B, EDNRB, CSF1, GJD3, PDGFC, TNFSF13B, ABAT, SOCS1, XAF1, TN…	184
GO:0060333	interferon-gamma-mediated signaling pathway	31/511	80/16792	2.65251e-25	8.27164e-23	5.69299e-24	IRF2, STAT1, OASL, PML, ICAM1, HLA-C, HLA-B, IRF1, HLA-F, HLA-E, HLA-A, OAS3, HLA-DPA1, HLA-DPB1, GBP2, HLA-DQA1, HLA-G, GBP1, HLA-DQB1, TRIM21, IRF9, JAK2, VCAM1, OAS1, OAS2, CIITA, NMI, B2M, NLRC5, IRF7, HLA-DRA	31
GO:0071310	cellular response to organic substance	155/511	2186/16792	2.67981e-25	7.93894e-23	5.69299e-24	PTGFR, LRP6, PTGER2, STAT1, HES1, ST3GAL6, STAT2, BST2, MX1, OXTR, PML, SFRP1, HHIP, NKX3-1, RBCK1, CCL5, FZD7, CCL8, CCL7, CTSS, NAMPT, F2RL1, SKIL, COL3A1, IL31RA, ISG15, HLA-G, AIM2, IL1A, JAK2, P2RX7, VCAM1, OAS1, DLL1, OAS2, MX2, COL1A1, FKBP14, PDE4B, EDNRB, CSF1, PDGFC, TNFSF13B, SOCS1, TNFRSF14, XAF1, SPARC, TGFB2, CX3CL1, CXCL5, VDR, VEGFC, CXCL11, MUC1, CXCL6, HLA-F, MGARP, HLA-E, PSMB1…	155
GO:0007166	cell surface receptor signaling pathway	175/511	2669/16792	4.23672e-25	1.19536e-22	8.60917e-24	LRP6, STAT1, HES1, STAT2, CD274, BST2, MX1, OXTR, RNF213, TNFSF10, PML, SFRP1, HHIP, NKX3-1, RBCK1, CCL5, FZD7, CCL8, NGEF, IGFBP3, CCL7, NAMPT, F2RL1, SKIL, PLXNC1, PELI2, IL31RA, COL3A1, ITGBL1, ISG15, HLA-G, AIM2, IL1A, TSPAN13, JAK2, PMAIP1, P2RX7, VCAM1, DLL1, OAS1, SEMA3F, OAS2, MX2, COL1A1, SEMA6D, PDE4B, EDNRB, CSF1, ADGRA3, PDGFC, TNFSF13B, ABAT, SHC3, SOCS1, ADAM12, XAF1, TNFRSF14, TGFB…	175
GO:0002684	positive regulation of immune system process	93/511	960/16792	1.57597e-23	4.24438e-21	3.069e-22	CXCL10, HES1, CD274, PDCD1LG2, ZC3HAV1, IDO1, ICAM1, INHBA, CCL5, RBCK1, LGALS9, CCL8, DDX60, CCL7, CTSS, HLA-B, HLA-DMB, F2RL1, HLA-A, CXCL8, IL12RB1, CADM1, ISG15, HLA-G, AIM2, VNN1, IL12A, CEACAM1, ID2, FLT3LG, IL1A, CD74, PSMB8, A2M, VCAM1, P2RX7, PLSCR1, PDE4B, IFIH1, CSF1, TNFSF13B, TAP2, IL15RA, CD47, TAP1, ITK, IL15, TNFRSF14, WNT5A, TGFB2, THEMIS2, CAMK1D, MICB, CXCL5, VEGFC, CXCL11, CXC…	93
GO:0002252	immune effector process	80/511	742/16792	4.86274e-23	1.25268e-20	9.09077e-22	CXCL10, STAT1, STAT2, BST2, MX1, OASL, ZC3HAV1, PML, IFIT5, ICAM1, BTN3A3, IFIT1, CXADR, LGALS9, IFIT2, DDX60, IFIT3, HLA-B, C19orf66, HLA-DMB, F2RL1, HLA-A, IL12RB1, CADM1, IL31RA, ISG15, AIM2, IL12A, CEACAM1, IFI44L, IRF9, SAMHD1, CD74, APOBEC3G, PMAIP1, A2M, P2RX7, OAS1, PLSCR1, DLL1, OAS2, MX2, APOBEC3B, IFIH1, IFITM1, HERC5, CD47, IL15, TNFRSF14, WNT5A, TGFB2, SERINC5, MICB, CXCL5, CXCL6, IR…	80
GO:0006950	response to stress	206/511	3677/16792	1.46862e-21	3.62565e-19	2.63995e-20	PTGFR, PTGER2, STAT1, STAT2, SLC7A11, PML, CCL5, APOL3, FZD7, ZMAT3, CCL8, CCL7, SKIL, RMI2, IL31RA, APOL2, VNN1, PTGS1, JAK2, PMAIP1, A2M, PLSCR1, MX2, LXN, CSF1, ABAT, HERC5, TAP1, TNFRSF14, TGFB2, SERINC5, CX3CL1, CXCL5, CXCL11, CXCL6, CFB, PTN, CD24, C2, GBP5, C1S, DSP, C1R, GPR4, SERPING1, THBD, CXCL10, IL18BP, HPSE, UBASH3B, OASL, IDO1, ICAM1, INHBA, LGALS9, DDX60, HLA-C, C19orf66, HLA-B, C…	206
GO:0051239	regulation of multicellular organismal process	166/511	2659/16792	2.56045e-21	6.06827e-19	4.43213e-20	LRP6, RNF128, STAT1, HES1, CLIC2, CD274, BST2, PDCD1LG2, OXTR, UBE2L6, PML, NRCAM, SFRP1, GLS, NKX3-1, CUX1, CXADR, ANK2, FZD7, NGEF, RBP1, LMCD1, COL5A1, F2RL1, SKIL, PLXNC1, CADM1, COL3A1, ISG15, HLA-G, AIM2, VNN1, GSDMD, ZHX2, FLT3LG, IL1A, JAK2, P2RX7, DLL1, SEMA3F, COL1A1, ID4, WASF3, SEMA6D, TMEM119, APLN, PDE4B, IFIH1, EDNRB, CSF1, GJD3, ANKH, ABAT, HERC5, SOCS1, PDE5A, TNFRSF14, SPARC, TG…	166
GO:0070887	cellular response to chemical stimulus	165/511	2648/16792	4.39336e-21	1.00118e-18	7.33328e-20	PTGFR, LRP6, GCH1, PTGER2, STAT1, HES1, ST3GAL6, STAT2, BST2, MX1, OXTR, PARVA, PML, SFRP1, HHIP, NKX3-1, RBCK1, CCL5, CXADR, FZD7, CCL8, CCL7, CTSS, NAMPT, F2RL1, SKIL, IL31RA, COL3A1, ISG15, HLA-G, AIM2, VNN1, PTGS1, IL1A, JAK2, PMAIP1, P2RX7, VCAM1, OAS1, DLL1, OAS2, MX2, COL1A1, FKBP14, PDE4B, EDNRB, CSF1, PDGFC, TNFSF13B, SOCS1, TNFRSF14, XAF1, SPARC, TGFB2, CX3CL1, CXCL5, VDR, VEGFC, CXCL11…	165
GO:0098542	defense response to other organism	59/511	494/16792	4.56668e-19	1.00213e-16	7.35972e-18	CXCL10, STAT1, STAT2, BST2, MX1, ZC3HAV1, OASL, PML, IFIT5, BATF2, IFIT1, CXADR, IFIT2, DDX60, IFIT3, C19orf66, F2RL1, HLA-A, IL12RB1, IL31RA, ISG15, AIM2, IL12A, GSDMD, IFI44L, IRF9, SAMHD1, APOBEC3G, PMAIP1, P2RX7, PLSCR1, OAS1, OAS2, MX2, APOBEC3B, IFIH1, IFITM1, HERC5, IL15, TNFRSF14, SERINC5, MICB, CXCL6, IRF1, HLA-E, DDX58, OAS3, CD40, GBP1, GBP3, DHX58, CXCL9, TLR3, ISG20, B2M, NLRC5, IRF7…	59
GO:0001816	cytokine production	67/511	631/16792	6.41069e-19	1.35655e-16	9.98718e-18	HPSE, RNF128, BST2, CD274, PDCD1LG2, UBE2L6, ZC3HAV1, PML, IDO1, INHBA, LGALS9, DDX60, HLA-B, F2RL1, HLA-A, IL12RB1, CADM1, IL31RA, ISG15, HLA-G, AIM2, IL12A, GSDMD, TRIM21, CEACAM1, IL1A, ASB1, CASP1, CD74, JAK2, P2RX7, DLL1, NMI, KLF4, PDE4B, IFIH1, HERC5, SOCS1, ITK, IL15, TNFRSF14, WNT5A, TGFB2, CX3CL1, POSTN, IRF1, HLA-E, DDX58, HLA-DPA1, FZD5, CD40, HLA-DPB1, GBP1, BTN3A2, BTN3A1, CD24, DHX…	67
GO:0001775	cell activation	82/511	910/16792	9.23815e-19	1.88745e-16	1.39278e-17	HLA-DOA, CXCL10, SOX4, HES1, BST2, CD274, UBASH3B, PDCD1LG2, IDO1, SLC7A11, SFRP1, ICAM1, INHBA, BATF2, CCL5, LGALS9, CXADR, BATF3, FZD7, HLA-DMB, F2RL1, F2RL2, HLA-A, CXCL8, IL12RB1, CADM1, COL3A1, IL31RA, HLA-G, VNN1, IL12A, CYGB, ID2, CEACAM1, FLT3LG, CD74, JAK2, VCAM1, P2RX7, PLSCR1, DLL1, COL1A1, RUNX2, CSF1, TNFSF13B, ABAT, IL15RA, CD47, DGKG, PDE5A, ITK, IL15, TNFRSF14, WNT5A, CX3CL1, MICB…	82
GO:0050776	regulation of immune response	82/511	912/16792	1.0535e-18	2.08066e-16	1.53866e-17	STAT1, STAT2, BST2, ZC3HAV1, IDO1, ICAM1, CCL5, RBCK1, LGALS9, CXADR, DDX60, CTSS, HLA-C, HLA-B, HLA-DMB, F2RL1, HLA-A, IL12RB1, CADM1, COL3A1, HLA-G, AIM2, IL12A, CEACAM1, SAMHD1, CD74, JAK2, TRAFD1, PSMB8, PARP9, A2M, VCAM1, P2RX7, PLSCR1, NMI, COL1A1, PDE4B, IFIH1, IFITM1, TNFSF13B, SOCS1, ERAP1, ITK, IL15, TNFRSF14, WNT5A, TGFB2, THEMIS2, MICB, IRF1, HLA-F, HLA-E, PSMB10, CFB, DDX58, USP18, P…	82
GO:0048583	regulation of response to stimulus	195/511	3636/16792	5.58566e-18	1.06758e-15	7.91079e-17	HES1, CMAHP, STAT1, CLIC2, STAT2, TNFSF10, PML, HHIP, CCL5, RBCK1, APOL3, FZD7, CCL8, NGEF, IGFBP3, CCL7, SKIL, RMI2, IL31RA, VNN1, JAK2, PMAIP1, A2M, DLL1, PLSCR1, CSF1, ABAT, HERC5, TNFRSF14, TGFB2, CX3CL1, CXCL5, CXCL11, CXCL6, CFB, CD24, RALGPS2, C2, GBP5, C1S, DEPTOR, C1R, GPR4, SERPING1, FGD4, THBD, CASP10, CXCL10, IL18BP, HPSE, UBASH3B, IDO1, ICAM1, INHBA, VSNL1, LGALS9, TMEM100, DDX60, HL…	195
GO:0001817	regulation of cytokine production	62/511	577/16792	9.09403e-18	1.68382e-15	1.25008e-16	HPSE, RNF128, BST2, CD274, PDCD1LG2, UBE2L6, ZC3HAV1, PML, IDO1, INHBA, LGALS9, DDX60, HLA-B, F2RL1, HLA-A, IL12RB1, CADM1, ISG15, HLA-G, AIM2, IL12A, GSDMD, TRIM21, CEACAM1, IL1A, ASB1, CASP1, CD74, JAK2, P2RX7, DLL1, NMI, KLF4, PDE4B, IFIH1, HERC5, SOCS1, TNFRSF14, IL15, WNT5A, TGFB2, CX3CL1, POSTN, IRF1, HLA-E, DDX58, HLA-DPA1, FZD5, CD40, HLA-DPB1, GBP1, CD24, DHX58, GBP5, HMOX1, TLR3, B2M, G…	62
GO:0044764	multi-organism cellular process	83/511	973/16792	1.43758e-17	2.58111e-15	1.91966e-16	CXCL10, STAT1, STAT2, BST2, MX1, OASL, ZC3HAV1, PML, IFIT5, ICAM1, IFIT1, TRIM14, CCL5, RBCK1, CXADR, LGALS9, ZNF571, BATF3, IFIT2, CCL8, DDX60, IFIT3, HLA-C, CXCR4, HLA-B, C19orf66, F2RL1, HLA-A, CXCL8, IL12RB1, ISG15, AIM2, IL12A, GSDMD, BICD1, TRIM21, PDZD8, IFI44L, IRF9, KRT7, SAMHD1, APOBEC3G, VRK2, PMAIP1, PSMB8, VCAM1, OAS1, PLSCR1, OAS2, MX2, APOBEC3B, IFIH1, IFITM1, TAP2, HERC5, TAP1, IL…	83
GO:0016032	viral process	82/511	966/16792	3.12149e-17	5.43965e-15	4.05246e-16	CXCL10, STAT1, STAT2, BST2, MX1, OASL, ZC3HAV1, PML, IFIT5, ICAM1, IFIT1, TRIM14, CCL5, RBCK1, CXADR, LGALS9, ZNF571, BATF3, IFIT2, CCL8, DDX60, IFIT3, HLA-C, CXCR4, HLA-B, C19orf66, F2RL1, HLA-A, CXCL8, IL12RB1, ISG15, AIM2, IL12A, BICD1, TRIM21, PDZD8, IFI44L, IRF9, KRT7, SAMHD1, APOBEC3G, VRK2, PMAIP1, PSMB8, VCAM1, OAS1, PLSCR1, OAS2, MX2, APOBEC3B, IFIH1, IFITM1, TAP2, HERC5, TAP1, IL15, TNF…	82
GO:0050896	response to stimulus	345/511	8329/16792	5.47266e-17	9.26443e-15	6.91283e-16	PATJ, PTGFR, PTGER2, STAT1, CMAHP, HES1, STAT2, CD274, CLIC2, PARVA, TNFSF10, PML, SLC7A11, NRCAM, HHIP, ENAH, CAP2, RBCK1, CCL5, APOL3, ZMAT3, FZD7, CCL8, CCL7, IGFBP3, NGEF, SKIL, RMI2, IL31RA, APOL2, VNN1, PTGS1, PDZD8, FLT3LG, TSPAN13, PMAIP1, JAK2, A2M, PLSCR1, DLL1, RXFP1, MX2, LXN, APLN, CSF1, GJD3, ADGRA3, TAP2, TAPBP, ABAT, HERC5, TAP1, ADAM12, TNFRSF14, TGFB2, SERINC5, GUCY1A2, CX3CL1, …	345
GO:0044403	symbiosis, encompassing mutualism through parasitism	83/511	998/16792	6.34404e-17	1.83187e-14	7.60258e-16	CXCL10, STAT1, STAT2, BST2, MX1, OASL, ZC3HAV1, PML, IFIT5, ICAM1, IFIT1, TRIM14, CCL5, RBCK1, CXADR, LGALS9, ZNF571, BATF3, IFIT2, CCL8, DDX60, IFIT3, HLA-C, CXCR4, HLA-B, C19orf66, F2RL1, HLA-A, CXCL8, IL12RB1, ISG15, AIM2, IL12A, BICD1, TRIM21, PDZD8, IFI44L, IRF9, KRT7, SAMHD1, APOBEC3G, VRK2, PMAIP1, PSMB8, VCAM1, OAS1, PLSCR1, OAS2, SUGT1, MX2, APOBEC3B, IFIH1, IFITM1, TAP2, HERC5, TAP1, IL…	83
GO:0044419	interspecies interaction between organisms	83/511	998/16792	6.34404e-17	1.83187e-14	7.60258e-16	CXCL10, STAT1, STAT2, BST2, MX1, OASL, ZC3HAV1, PML, IFIT5, ICAM1, IFIT1, TRIM14, CCL5, RBCK1, CXADR, LGALS9, ZNF571, BATF3, IFIT2, CCL8, DDX60, IFIT3, HLA-C, CXCR4, HLA-B, C19orf66, F2RL1, HLA-A, CXCL8, IL12RB1, ISG15, AIM2, IL12A, BICD1, TRIM21, PDZD8, IFI44L, IRF9, KRT7, SAMHD1, APOBEC3G, VRK2, PMAIP1, PSMB8, VCAM1, OAS1, PLSCR1, OAS2, SUGT1, MX2, APOBEC3B, IFIH1, IFITM1, TAP2, HERC5, TAP1, IL…	83
GO:0042221	response to chemical	208/511	4117/16792	2.95616e-16	5.32907e-14	3.45404e-15	PTGFR, PTGER2, STAT1, HES1, STAT2, CLIC2, CD274, PARVA, TNFSF10, SLC7A11, PML, NRCAM, HHIP, ENAH, CCL5, RBCK1, FZD7, CCL8, CCL7, SKIL, IL31RA, VNN1, PTGS1, JAK2, PMAIP1, DLL1, PLSCR1, MX2, CSF1, GJD3, ABAT, TNFRSF14, TGFB2, CX3CL1, CXCL5, CXCL11, CXCL6, ANOS1, COL16A1, PTN, CD24, C2, GBP5, CMPK2, THBD, CXCL10, IL18BP, OASL, IDO1, ICAM1, INHBA, VSNL1, LGALS9, TMEM100, HLA-C, C19orf66, HLA-B, CXCR4…	208
GO:0045321	leukocyte activation	69/511	747/16792	3.59395e-16	5.19584e-14	4.09683e-15	HLA-DOA, SOX4, HES1, BST2, CD274, PDCD1LG2, IDO1, SFRP1, ICAM1, INHBA, BATF2, CCL5, CXADR, LGALS9, BATF3, FZD7, HLA-DMB, F2RL1, HLA-A, CXCL8, IL12RB1, CADM1, IL31RA, HLA-G, VNN1, IL12A, ID2, CEACAM1, FLT3LG, CD74, VCAM1, P2RX7, PLSCR1, DLL1, RUNX2, CSF1, TNFSF13B, IL15RA, CD47, PDE5A, ITK, IL15, TNFRSF14, WNT5A, CX3CL1, MICB, IRF1, HLA-E, PSMB10, HLA-DPA1, FZD5, CD40, HLA-DPB1, HLA-DQA1, HLA-DQB1…	69
GO:0051704	multi-organism process	140/511	2341/16792	8.39241e-16	1.34892e-13	9.33892e-15	PTGFR, GCH1, PTGER2, STAT1, STAT2, BST2, MX1, OXTR, PML, GLS, GLRB, RBCK1, CCL5, CXADR, CCL8, NAMPT, F2RL1, SKIL, APOL1, CADM1, IL31RA, ISG15, APOL2, AIM2, GSDMD, PDZD8, KRT7, JAK2, PMAIP1, P2RX7, VCAM1, OAS1, PLSCR1, OAS2, RXFP1, MX2, SUGT1, TMEM119, PDE4B, IFIH1, EDNRB, TAP2, ABAT, HERC5, TAP1, PDE5A, TNFRSF14, SPARC, SERINC5, CXCL5, VDR, CXCL11, MUC1, CXCL6, TDRD7, HLA-E, DDX58, PSMB10, OAS3, …	140
GO:0016337	single organismal cell-cell adhesion	67/511	725/16792	1.04339e-15	1.47993e-13	1.13407e-14	HLA-DOA, LRP6, CDH10, SOX4, HES1, CD274, PARVA, PDCD1LG2, UBASH3B, KIF26B, SLC7A11, IDO1, NRCAM, ICAM1, CCL5, CXADR, LGALS9, FZD7, HLA-DMB, F2RL1, HLA-A, IL12RB1, CADM1, HLA-G, VNN1, IL12A, CEACAM1, CD74, JAK2, VCAM1, P2RX7, KLF4, PKP2, RUNX2, NEGR1, TNFSF13B, ABAT, CD47, PDE5A, ITK, TNFRSF14, IL15, WNT5A, TGFB2, MICB, IRF1, COL14A1, PODXL, HLA-E, PSMB10, HLA-DPA1, FZD5, HLA-DPB1, HLA-DQA1, HLA-D…	67
GO:0050793	regulation of developmental process	131/511	2129/16792	1.16335e-15	1.60427e-13	1.23571e-14	LRP6, STAT1, HES1, STAT2, OXTR, PARVA, PML, NRCAM, SFRP1, NKX3-1, CUX1, FZD7, IGFBP3, NGEF, CCL7, RBP1, COL5A1, SKIL, PLXNC1, COL3A1, ISG15, HLA-G, VNN1, ZHX2, PDZD8, FLT3LG, IL1A, P2RX7, DLL1, SEMA3F, ID4, COL1A1, WASF3, SEMA6D, TMEM119, CDC42SE2, EDNRB, GAS2, CSF1, ANKH, TNFSF13B, PDE5A, SPARC, TGFB2, CX3CL1, VDR, VEGFC, GPC6, SIX4, PSMB10, PSMB9, RASSF2, PTN, FOXS1, GBP1, PALMD, ACVR2A, CD24, …	131
GO:0030155	regulation of cell adhesion	62/511	643/16792	2.04406e-15	2.81886e-13	2.12296e-14	HLA-DOA, HES1, CD274, PDCD1LG2, UBASH3B, KIF26B, ABI3BP, PML, IDO1, SFRP1, ICAM1, CCL5, LGALS9, HACD1, FZD7, HLA-DMB, HLA-A, CXCL8, IL12RB1, HLA-G, VNN1, IL12A, CEACAM1, CD74, JAK2, VCAM1, DLL1, COL1A1, KLF4, CSF1, TNFSF13B, ABAT, CD47, PDE5A, TNFRSF14, IL15, WNT5A, TGFB2, PTPRR, CX3CL1, POSTN, VEGFC, MUC1, IRF1, PODXL, HLA-E, COL16A1, HLA-DPA1, HLA-DPB1, PTN, HLA-DQA1, GBP1, HLA-DQB1, IL7, CD24,…	62
GO:0048584	positive regulation of response to stimulus	126/511	2030/16792	2.76248e-15	3.82472e-13	2.77112e-14	LRP6, HES1, BST2, TNFSF10, PML, SFRP1, NKX3-1, CCL5, RBCK1, APOL3, FZD7, CCL8, CCL7, IGFBP3, CTSS, LMCD1, F2RL1, SKIL, F2RL2, PELI2, CADM1, COL3A1, IL31RA, AIM2, IL1A, JAK2, PMAIP1, A2M, P2RX7, DLL1, PLSCR1, COL1A1, PDE4B, IFIH1, CSF1, PDGFC, TNFSF13B, ABAT, SOCS1, PDE5A, TNFRSF14, TGFB2, CX3CL1, CXCL5, VEGFC, CXCL11, CXCL6, HLA-E, DDX58, CFB, PSMB10, PSMB9, RASSF2, HLA-DPA1, HLA-DPB1, HLA-DQA1, …	126
GO:0098602	single organism cell adhesion	69/511	779/16792	2.78672e-15	3.73701e-13	2.77112e-14	HLA-DOA, LRP6, CDH10, SOX4, HES1, CD274, PARVA, PDCD1LG2, UBASH3B, KIF26B, SLC7A11, IDO1, NRCAM, ICAM1, CCL5, CXADR, LGALS9, FZD7, HLA-DMB, F2RL1, HLA-A, IL12RB1, CADM1, HLA-G, VNN1, IL12A, CEACAM1, CD74, JAK2, VCAM1, P2RX7, KLF4, PKP2, RUNX2, NEGR1, TNFSF13B, ABAT, CD47, PDE5A, ITK, IL15, TNFRSF14, WNT5A, TGFB2, MICB, POSTN, IRF1, COL14A1, PODXL, HLA-E, PSMB10, HLA-DPA1, FZD5, HLA-DPB1, HLA-DQA1…	69
GO:0007155	cell adhesion	111/511	1699/16792	7.39136e-15	9.79439e-13	7.19685e-14	LRP6, PCDH10, CDH10, HES1, STAT1, CD274, PDCD1LG2, PARVA, SLC7A11, NRCAM, SFRP1, CCL5, CXADR, FZD7, COL5A1, F2RL1, PLXNC1, COL3A1, ITGBL1, CADM1, HLA-G, VNN1, JAK2, CDH19, VCAM1, P2RX7, COL1A1, CSF1, TNFSF13B, ABAT, PDE5A, ADAM12, TNFRSF14, TGFB2, PTPRR, CX3CL1, VEGFC, MUC1, PODXL, HLA-E, PSMB10, HLA-DPA1, ANOS1, COL16A1, HLA-DPB1, PTN, HLA-DQA1, GBP1, HLA-DQB1, CD24, PLEKHA2, IL32, CLDN23, STXBP…	111
GO:0022610	biological adhesion	111/511	1705/16792	9.38797e-15	1.21547e-12	8.95437e-14	LRP6, PCDH10, CDH10, HES1, STAT1, CD274, PDCD1LG2, PARVA, SLC7A11, NRCAM, SFRP1, CCL5, CXADR, FZD7, COL5A1, F2RL1, PLXNC1, COL3A1, ITGBL1, CADM1, HLA-G, VNN1, JAK2, CDH19, VCAM1, P2RX7, COL1A1, CSF1, TNFSF13B, ABAT, PDE5A, ADAM12, TNFRSF14, TGFB2, PTPRR, CX3CL1, VEGFC, MUC1, PODXL, HLA-E, PSMB10, HLA-DPA1, ANOS1, COL16A1, HLA-DPB1, PTN, HLA-DQA1, GBP1, HLA-DQB1, CD24, PLEKHA2, IL32, CLDN23, STXBP…	111
GO:0051240	positive regulation of multicellular organismal process	99/511	1431/16792	9.81678e-15	1.23168e-12	9.17611e-14	LRP6, HES1, CD274, OXTR, PML, NRCAM, CUX1, NKX3-1, SKIL, F2RL1, CADM1, ISG15, HLA-G, VNN1, AIM2, GSDMD, FLT3LG, IL1A, JAK2, P2RX7, DLL1, ID4, COL1A1, WASF3, TMEM119, PDE4B, APLN, EDNRB, IFIH1, CSF1, ABAT, PDE5A, TNFRSF14, SPARC, TGFB2, CX3CL1, VDR, VEGFC, SIX4, HLA-E, DDX58, HLA-DPA1, HLA-DPB1, PTN, FOXS1, ACVR2A, CD24, DHX58, GBP5, SEMA5A, LRRN3, THBD, HPSE, GJA5, ZC3HAV1, IDO1, ICAM1, INHBA, CT…	99
GO:0007154	cell communication	275/511	6275/16792	1.89895e-14	2.34346e-12	1.74022e-13	PATJ, PTGFR, PTGER2, STAT1, CMAHP, HES1, STAT2, CD274, CLIC2, TNFSF10, PML, NRCAM, HHIP, CAP2, RBCK1, CCL5, APOL3, ZMAT3, FZD7, CCL8, CCL7, NGEF, IGFBP3, SKIL, RMI2, IL31RA, VNN1, PDZD8, FLT3LG, TSPAN13, PMAIP1, JAK2, A2M, PLSCR1, DLL1, RXFP1, MX2, SLC12A7, APLN, CSF1, GJD3, ADGRA3, ABAT, ADAM12, TNFRSF14, TGFB2, GUCY1A2, CX3CL1, CXCL5, GPC6, CXCL11, CXCL6, ANOS1, COL16A1, PTN, CD24, RALGPS2, DAA…	275
GO:0042110	T cell activation	49/511	446/16792	2.25075e-14	2.72515e-12	1.98477e-13	HLA-DOA, SOX4, HES1, CD274, PDCD1LG2, IDO1, ICAM1, CCL5, CXADR, LGALS9, FZD7, HLA-DMB, F2RL1, HLA-A, IL12RB1, CADM1, HLA-G, VNN1, IL12A, CEACAM1, CD74, VCAM1, P2RX7, RUNX2, TNFSF13B, CD47, PDE5A, ITK, TNFRSF14, IL15, MICB, IRF1, HLA-E, PSMB10, HLA-DPA1, FZD5, HLA-DPB1, HLA-DQA1, IL7, HLA-DQB1, CD24, BTN3A1, EGR3, CDK6, B2M, AZI2, GPNMB, RSAD2, HLA-DRA	49
GO:0070489	T cell aggregation	49/511	446/16792	2.25075e-14	2.72515e-12	1.98477e-13	HLA-DOA, SOX4, HES1, CD274, PDCD1LG2, IDO1, ICAM1, CCL5, CXADR, LGALS9, FZD7, HLA-DMB, F2RL1, HLA-A, IL12RB1, CADM1, HLA-G, VNN1, IL12A, CEACAM1, CD74, VCAM1, P2RX7, RUNX2, TNFSF13B, CD47, PDE5A, ITK, TNFRSF14, IL15, MICB, IRF1, HLA-E, PSMB10, HLA-DPA1, FZD5, HLA-DPB1, HLA-DQA1, IL7, HLA-DQB1, CD24, BTN3A1, EGR3, CDK6, B2M, AZI2, GPNMB, RSAD2, HLA-DRA	49
GO:0071593	lymphocyte aggregation	49/511	447/16792	2.43632e-14	2.88125e-12	2.10863e-13	HLA-DOA, SOX4, HES1, CD274, PDCD1LG2, IDO1, ICAM1, CCL5, CXADR, LGALS9, FZD7, HLA-DMB, F2RL1, HLA-A, IL12RB1, CADM1, HLA-G, VNN1, IL12A, CEACAM1, CD74, VCAM1, P2RX7, RUNX2, TNFSF13B, CD47, PDE5A, ITK, TNFRSF14, IL15, MICB, IRF1, HLA-E, PSMB10, HLA-DPA1, FZD5, HLA-DPB1, HLA-DQA1, IL7, HLA-DQB1, CD24, BTN3A1, EGR3, CDK6, B2M, AZI2, GPNMB, RSAD2, HLA-DRA	49
GO:0023052	signaling	274/511	6260/16792	2.71948e-14	3.16003e-12	2.31091e-13	PATJ, PTGFR, PTGER2, STAT1, CMAHP, HES1, STAT2, CD274, CLIC2, TNFSF10, PML, NRCAM, HHIP, CAP2, RBCK1, CCL5, APOL3, ZMAT3, FZD7, CCL8, CCL7, NGEF, IGFBP3, SKIL, RMI2, IL31RA, VNN1, PDZD8, FLT3LG, TSPAN13, PMAIP1, JAK2, A2M, PLSCR1, DLL1, RXFP1, MX2, SLC12A7, APLN, CSF1, GJD3, ADGRA3, ABAT, ADAM12, TNFRSF14, TGFB2, GUCY1A2, CX3CL1, CXCL5, GPC6, CXCL11, CXCL6, ANOS1, COL16A1, PTN, CD24, RALGPS2, DAA…	274
GO:0044700	single organism signaling	272/511	6207/16792	3.35694e-14	3.82039e-12	2.80166e-13	PATJ, PTGFR, PTGER2, STAT1, CMAHP, HES1, STAT2, CD274, CLIC2, TNFSF10, PML, NRCAM, HHIP, CAP2, RBCK1, CCL5, APOL3, ZMAT3, FZD7, CCL8, CCL7, NGEF, IGFBP3, SKIL, RMI2, IL31RA, VNN1, PDZD8, FLT3LG, TSPAN13, PMAIP1, JAK2, A2M, PLSCR1, DLL1, RXFP1, MX2, SLC12A7, APLN, CSF1, GJD3, ADGRA3, ABAT, ADAM12, TNFRSF14, TGFB2, GUCY1A2, CX3CL1, CXCL5, GPC6, CXCL11, CXCL6, ANOS1, COL16A1, PTN, CD24, RALGPS2, DAA…	272
GO:0070486	leukocyte aggregation	49/511	454/16792	4.41821e-14	4.93972e-12	3.62269e-13	HLA-DOA, SOX4, HES1, CD274, PDCD1LG2, IDO1, ICAM1, CCL5, CXADR, LGALS9, FZD7, HLA-DMB, F2RL1, HLA-A, IL12RB1, CADM1, HLA-G, VNN1, IL12A, CEACAM1, CD74, VCAM1, P2RX7, RUNX2, TNFSF13B, CD47, PDE5A, ITK, TNFRSF14, IL15, MICB, IRF1, HLA-E, PSMB10, HLA-DPA1, FZD5, HLA-DPB1, HLA-DQA1, IL7, HLA-DQB1, CD24, BTN3A1, EGR3, CDK6, B2M, AZI2, GPNMB, RSAD2, HLA-DRA	49
GO:0031347	regulation of defense response	61/511	676/16792	7.04276e-14	7.72316e-12	5.67511e-13	STAT1, STAT2, ZC3HAV1, PML, IDO1, IFIT1, CCL5, LGALS9, CCL8, DDX60, CCL7, CTSS, HLA-B, F2RL1, HLA-A, IL12RB1, CADM1, AIM2, IL12A, CASP4, CEACAM1, CASP1, SAMHD1, TNFRSF1B, APOBEC3G, JAK2, PSMB8, TRAFD1, PARP9, A2M, PLSCR1, NMI, KLF4, EDNRB, IFIH1, HERC5, CD47, SOCS1, ERAP1, ADAMTS12, IL15, WNT5A, CX3CL1, MICB, IRF1, HLA-E, PSMB10, CFB, DDX58, PSMB9, USP18, PSME1, DHX58, GBP5, C2, TLR3, B2M, SERPIN…	61
GO:0046649	lymphocyte activation	59/511	643/16792	9.49545e-14	1.02259e-11	7.52182e-13	HLA-DOA, SOX4, HES1, CD274, BST2, PDCD1LG2, IDO1, SFRP1, ICAM1, INHBA, CCL5, CXADR, LGALS9, FZD7, HLA-DMB, F2RL1, HLA-A, IL12RB1, CADM1, HLA-G, VNN1, IL12A, ID2, CEACAM1, FLT3LG, CD74, VCAM1, P2RX7, DLL1, RUNX2, TNFSF13B, IL15RA, CD47, PDE5A, ITK, TNFRSF14, IL15, MICB, IRF1, HLA-E, PSMB10, HLA-DPA1, FZD5, CD40, HLA-DPB1, HLA-DQA1, IL7, HLA-DQB1, BTN3A1, CD24, CD38, EGR3, CDK6, B2M, AZI2, GPNMB, R…	59
GO:0007159	leukocyte cell-cell adhesion	50/511	491/16792	2.1642e-13	2.2894e-11	1.6858e-12	HLA-DOA, HES1, SOX4, CD274, PDCD1LG2, IDO1, ICAM1, CCL5, CXADR, LGALS9, FZD7, HLA-DMB, F2RL1, HLA-A, IL12RB1, CADM1, HLA-G, VNN1, IL12A, CEACAM1, CD74, P2RX7, VCAM1, KLF4, RUNX2, TNFSF13B, CD47, ITK, PDE5A, TNFRSF14, IL15, MICB, IRF1, HLA-E, PSMB10, HLA-DPA1, FZD5, HLA-DPB1, HLA-DQA1, IL7, HLA-DQB1, CD24, BTN3A1, EGR3, CDK6, B2M, AZI2, GPNMB, RSAD2, HLA-DRA	50
GO:0050778	positive regulation of immune response	60/511	684/16792	3.93852e-13	4.09456e-11	3.01761e-12	ZC3HAV1, IDO1, RBCK1, CCL5, LGALS9, DDX60, CTSS, HLA-B, HLA-DMB, F2RL1, HLA-A, IL12RB1, CADM1, AIM2, IL12A, CEACAM1, CD74, PSMB8, A2M, P2RX7, PLSCR1, PDE4B, IFIH1, TNFSF13B, ITK, TNFRSF14, IL15, WNT5A, TGFB2, THEMIS2, MICB, IRF1, HLA-E, PSMB10, CFB, DDX58, PSMB9, HLA-DPA1, FZD5, CD40, HLA-DPB1, HLA-DQA1, GBP1, HLA-DQB1, BTN3A1, PSME1, DHX58, CD38, GBP5, C2, C1S, TLR3, C1R, B2M, NLRC5, SERPING1, I…	60
GO:0050865	regulation of cell activation	50/511	501/16792	4.62516e-13	4.72486e-11	3.48654e-12	HLA-DOA, HES1, CD274, PDCD1LG2, UBASH3B, IDO1, SFRP1, INHBA, CCL5, LGALS9, HLA-DMB, F2RL1, HLA-A, IL12RB1, IL31RA, HLA-G, VNN1, IL12A, CEACAM1, ID2, CYGB, FLT3LG, CD74, JAK2, VCAM1, PLSCR1, TNFSF13B, ABAT, IL15RA, CD47, PDE5A, TNFRSF14, IL15, WNT5A, IRF1, HLA-E, HLA-DPA1, CD40, HLA-DPB1, HLA-DQA1, IL7, HLA-DQB1, CD24, CD38, EGR3, HMOX1, GPNMB, IL27RA, THBD, HLA-DRA	50
GO:0048518	positive regulation of biological process	238/511	5285/16792	4.79386e-13	4.81426e-11	3.55635e-12	PTGFR, GSAP, STAT1, HES1, CLIC2, CD274, TNFSF10, PML, NRCAM, CAP2, RBCK1, CCL5, APOL3, ZMAT3, FZD7, CCL8, NGEF, IGFBP3, CCL7, SKIL, IL31RA, SULT1E1, VNN1, FLT3LG, JAK2, PMAIP1, A2M, DLL1, PLSCR1, TMEM119, APLN, CSF1, TAP2, ABAT, TAP1, TNFRSF14, TGFB2, GUCY1A2, CX3CL1, CXCL5, CXCL11, CXCL6, HELZ2, CFB, ALDH1A3, COL16A1, PTN, FOXS1, CD24, PLEKHA2, CSRP3, C2, GBP5, C1S, C1R, GPR4, SERPING1, FGD4, LR…	238
GO:0007165	signal transduction	254/511	5775/16792	5.16022e-13	5.09581e-11	3.76832e-12	PATJ, PTGFR, PTGER2, STAT1, CMAHP, HES1, STAT2, CD274, CLIC2, TNFSF10, PML, HHIP, CAP2, RBCK1, CCL5, APOL3, ZMAT3, FZD7, CCL8, NGEF, IGFBP3, CCL7, SKIL, RMI2, IL31RA, VNN1, PDZD8, FLT3LG, TSPAN13, PMAIP1, JAK2, A2M, PLSCR1, DLL1, RXFP1, MX2, APLN, CSF1, ADGRA3, ABAT, ADAM12, TNFRSF14, TGFB2, GUCY1A2, CX3CL1, CXCL5, GPC6, CXCL11, CXCL6, ANOS1, COL16A1, PTN, CD24, RALGPS2, DAAM1, DEPTOR, ADAM23, SD…	254
GO:0051241	negative regulation of multicellular organismal process	76/511	1017/16792	6.25839e-13	6.07878e-11	4.49996e-12	CXCL10, GJA5, RNF128, STAT1, HES1, BST2, CD274, UBASH3B, PDCD1LG2, OXTR, UBE2L6, IDO1, PML, SFRP1, INHBA, NKX3-1, LGALS9, FZD7, NGEF, COL5A1, F2RL1, COL3A1, ISG15, HLA-G, LRRC17, IL12A, ZHX2, CYGB, CEACAM1, ID2, ASB1, CD74, SOST, JAK2, P2RX7, DLL1, SEMA3F, CIITA, NMI, ID4, KLF4, SEMA6D, PDE4B, APLN, EDNRB, IFIH1, RFLNB, ABAT, IL15RA, HERC5, ADAMTS12, PDE5A, DPYSL3, WNT5A, SPARC, TGFB2, PTPRR, SIX…	76
GO:0032101	regulation of response to external stimulus	61/511	721/16792	1.1401e-12	1.08952e-10	8.07345e-12	CXCL10, HPSE, UBASH3B, ZC3HAV1, PML, IDO1, IFIT1, CCL5, LGALS9, DDX60, CCL8, CCL7, CXCR4, F2RL1, HLA-A, FAP, PLXNC1, CXCL8, IL12RB1, AIM2, IL12A, CASP4, CEACAM1, CASP1, TNFRSF1B, CD74, APOBEC3G, JAK2, A2M, SEMA3F, KLF4, SEMA6D, EDNRB, CSF1, ABAT, HERC5, CD47, ADAMTS12, IL15, WNT5A, CX3CL1, CAMK1D, MICB, CXCL5, CXCL11, VEGFC, CXCL6, CFB, DDX58, DHX58, PF4V1, BMP6, SERPINB2, GBP5, C2, CXCL9, TLR3, …	61
GO:2000026	regulation of multicellular organismal development	106/511	1721/16792	1.57886e-12	1.48487e-10	1.10136e-11	LRP6, HES1, STAT1, OXTR, PML, NRCAM, SFRP1, CUX1, NKX3-1, FZD7, NGEF, RBP1, COL5A1, SKIL, PLXNC1, COL3A1, ISG15, HLA-G, VNN1, ZHX2, FLT3LG, IL1A, P2RX7, DLL1, SEMA3F, ID4, COL1A1, SEMA6D, WASF3, TMEM119, EDNRB, CSF1, ANKH, SPARC, TGFB2, CX3CL1, VDR, GPC6, VEGFC, SIX4, PSMB10, PSMB9, RASSF2, PTN, ACVR2A, CD24, DAAM1, SDC2, SEMA5A, GPR4, LRRN3, HLA-DOA, CXCL10, HPSE, UBASH3B, TSPAN12, WARS, IDO1, I…	106
GO:0006954	inflammatory response	56/511	637/16792	2.5443e-12	2.35546e-10	1.74871e-11	CXCL10, PTGFR, PTGER2, IDO1, ICAM1, CCL5, LGALS9, APOL3, CCL8, CCL7, CXCR4, F2RL1, CXCL8, IL31RA, APOL2, VNN1, AIM2, GSDMD, PTGS1, CASP4, IL1A, TNFRSF1B, JAK2, A2M, VCAM1, P2RX7, PLSCR1, CIITA, NMI, KLF4, LXN, EDNRB, CSF1, CD47, TNFRSF14, IL15, WNT5A, THEMIS2, CX3CL1, CAMK1D, TNFRSF10D, CXCL5, CXCL11, CXCL6, CFB, CD40, PF4V1, BMP6, SCN9A, GBP5, C2, CXCL9, HMOX1, TLR3, SERPING1, LY75	56
GO:0098609	cell-cell adhesion	81/511	1164/16792	3.63661e-12	3.31494e-10	2.46324e-11	HLA-DOA, COBLL1, LRP6, PCDH10, CDH10, STAT1, SOX4, HES1, CD274, UBASH3B, PARVA, PDCD1LG2, KIF26B, ZC3HAV1, SLC7A11, IDO1, NRCAM, ICAM1, CCL5, CXADR, LGALS9, FZD7, HLA-DMB, F2RL1, HLA-A, IL12RB1, CADM1, HLA-G, VNN1, IL12A, AMIGO2, CEACAM1, CD74, JAK2, VCAM1, P2RX7, CDH19, KLF4, PKP2, PTPRD, RUNX2, NEGR1, TNFSF13B, ABAT, CD47, PDE5A, ITK, IL15, TNFRSF14, WNT5A, TGFB2, CX3CL1, MICB, BAIAP2L1, IRF1, …	81
GO:0050792	regulation of viral process	34/511	262/16792	4.27561e-12	3.8383e-10	2.8547e-11	IFITM1, STAT1, BST2, TAP2, MX1, ZC3HAV1, HERC5, OASL, TAP1, PML, IL15, TRIM14, IFIT1, CCL5, LGALS9, MICB, DDX60, C19orf66, HLA-A, DDX58, CXCL8, OAS3, IL12RB1, ISG15, AIM2, TRIM21, DHX58, APOBEC3G, PARP10, PLSCR1, OAS1, B2M, ISG20, RSAD2	34
GO:0002697	regulation of immune effector process	38/511	325/16792	4.56137e-12	4.03373e-10	3.00259e-11	BST2, ZC3HAV1, HERC5, PML, IL15, TNFRSF14, WNT5A, TGFB2, IFIT1, LGALS9, MICB, DDX60, HLA-B, HLA-DMB, F2RL1, HLA-E, HLA-A, CFB, DDX58, IL12RB1, FZD5, CD40, CADM1, AIM2, IL12A, CEACAM1, DHX58, CD74, APOBEC3G, C2, P2RX7, A2M, HMOX1, TLR3, B2M, SERPING1, RSAD2, IL27RA	38
GO:0044707	single-multicellular organism process	256/511	5943/16792	4.76852e-12	4.15492e-10	3.09535e-11	STAT1, HES1, CD274, PARVA, TNFSF10, PML, SLC7A11, NRCAM, HHIP, ENAH, DRP2, FZD7, NGEF, IGFBP3, SKIL, IL31RA, APOL2, VNN1, FLT3LG, JAK2, DHCR7, A2M, PLSCR1, DLL1, RXFP1, TMEM119, APLN, CSF1, GJD3, ABAT, HERC5, DAW1, TNFRSF14, TGFB2, SERINC5, CX3CL1, GPC6, ALDH1A3, ANOS1, PTN, FOXS1, CD24, MTURN, CSRP3, DAAM1, GBP5, DSP, ADAM23, SDC2, GPR4, SERPING1, LRRN3, SLC26A2, THBD, CASP10, CXCL10, HLA-DOA, H…	256
GO:0045088	regulation of innate immune response	40/511	360/16792	5.59903e-12	4.8079e-10	3.57928e-11	IFIH1, STAT1, STAT2, ZC3HAV1, ERAP1, SOCS1, WNT5A, CCL5, LGALS9, DDX60, CTSS, HLA-B, IRF1, F2RL1, HLA-E, HLA-A, PSMB10, DDX58, USP18, PSMB9, CADM1, AIM2, IL12A, CEACAM1, PSME1, DHX58, SAMHD1, JAK2, PSMB8, TRAFD1, PARP9, GBP5, A2M, PLSCR1, TLR3, NMI, SERPING1, NLRC5, IRF7, RSAD2	40
GO:0070661	leukocyte proliferation	35/511	280/16792	5.70868e-12	4.83197e-10	3.57928e-11	CSF1, HES1, CD274, TNFSF13B, PDCD1LG2, IDO1, PDE5A, TNFRSF14, IL15, CCL5, LGALS9, CCL8, IRF1, HLA-DMB, F2RL1, HLA-E, HLA-A, PSMB10, IL12RB1, HLA-DPA1, CD40, CADM1, HLA-DPB1, HLA-G, IL12A, IL7, BTN3A1, CD24, FLT3LG, CD38, CD74, P2RX7, VCAM1, GPNMB, AZI2	35
GO:0043900	regulation of multi-organism process	41/511	377/16792	5.74377e-12	4.79319e-10	3.57928e-11	EDNRB, IFITM1, STAT1, BST2, TAP2, MX1, OXTR, OASL, HERC5, ZC3HAV1, TAP1, PML, PDE5A, IL15, INHBA, IFIT1, TRIM14, CCL5, LGALS9, MICB, DDX60, C19orf66, F2RL1, HLA-A, DDX58, CXCL8, OAS3, IL12RB1, ISG15, AIM2, TRIM21, DHX58, APOBEC3G, BMP6, P2RX7, PARP10, PLSCR1, OAS1, ISG20, B2M, RSAD2	41
GO:0043903	regulation of symbiosis, encompassing mutualism through parasitism	35/511	285/16792	9.37589e-12	7.71553e-10	5.76578e-11	IFITM1, STAT1, BST2, TAP2, MX1, ZC3HAV1, HERC5, OASL, TAP1, PML, IL15, TRIM14, IFIT1, CCL5, LGALS9, MICB, DDX60, C19orf66, F2RL1, HLA-A, DDX58, CXCL8, OAS3, IL12RB1, ISG15, AIM2, TRIM21, DHX58, APOBEC3G, PARP10, PLSCR1, OAS1, B2M, ISG20, RSAD2	35
GO:0048525	negative regulation of viral process	22/511	108/16792	9.54383e-12	7.74617e-10	5.79284e-11	ISG15, IFITM1, STAT1, TRIM21, BST2, MX1, ZC3HAV1, OASL, PML, DHX58, APOBEC3G, IFIT1, TRIM14, CCL5, PARP10, OAS1, PLSCR1, MICB, C19orf66, ISG20, RSAD2, OAS3	22
GO:0019883	antigen processing and presentation of endogenous antigen	11/511	17/16792	9.83386e-12	7.87377e-10	5.89235e-11	HLA-C, TAP2, HLA-B, TAPBP, B2M, ERAP1, TAP1, ERAP2, CD74, HLA-E, HLA-A	11
GO:0045785	positive regulation of cell adhesion	41/511	385/16792	1.11407e-11	8.80111e-10	6.59089e-11	CSF1, HES1, CD274, TNFSF13B, PDCD1LG2, KIF26B, ABI3BP, CD47, SFRP1, TNFRSF14, IL15, WNT5A, TGFB2, CCL5, LGALS9, HACD1, CX3CL1, VEGFC, HLA-DMB, PODXL, HLA-E, HLA-A, IL12RB1, HLA-DPA1, COL16A1, HLA-DPB1, PTN, HLA-DQA1, HLA-G, VNN1, HLA-DQB1, IL12A, IL7, CD24, PLEKHA2, CD74, EGR3, JAK2, VCAM1, CDK6, HLA-DRA	41
GO:0001819	positive regulation of cytokine production	41/511	386/16792	1.20567e-11	9.39946e-10	7.04364e-11	PDE4B, IFIH1, HPSE, CD274, ZC3HAV1, IDO1, TNFRSF14, IL15, WNT5A, LGALS9, CX3CL1, POSTN, DDX60, IRF1, F2RL1, HLA-E, HLA-A, DDX58, IL12RB1, HLA-DPA1, FZD5, CD40, HLA-DPB1, CADM1, HLA-G, AIM2, GSDMD, IL12A, DHX58, IL1A, CASP1, CD74, JAK2, GBP5, P2RX7, HMOX1, TLR3, B2M, RSAD2, IRF7, IL27RA	41
GO:0002683	negative regulation of immune system process	41/511	388/16792	1.40369e-11	1.08011e-09	8.09926e-11	HLA-DOA, HES1, CD274, BST2, PDCD1LG2, UBASH3B, TAPBPL, IDO1, PDE5A, SFRP1, TNFRSF14, INHBA, IFIT1, TGFB2, LGALS9, MICB, HLA-B, IRF1, F2RL1, HLA-E, HLA-A, IL31RA, COL3A1, HLA-G, GBP1, LRRC17, ID2, CEACAM1, DHX58, CD74, TRAFD1, A2M, DLL1, HMOX1, CDK6, TLR3, NMI, SERPING1, NLRC5, GPNMB, IL27RA	41
GO:0045071	negative regulation of viral genome replication	16/511	51/16792	1.64051e-11	1.24616e-09	9.35026e-11	ISG15, IFITM1, BST2, MX1, OASL, ZC3HAV1, APOBEC3G, IFIT1, CCL5, PARP10, OAS1, PLSCR1, C19orf66, ISG20, RSAD2, OAS3	16
GO:0042127	regulation of cell proliferation	96/511	1552/16792	1.95164e-11	1.46373e-09	1.09896e-10	CXCL10, PTGFR, LRP6, HPSE, PTGER2, RARRES1, STAT1, SOX4, HES1, CD274, PDCD1LG2, WARS, IDO1, PML, SFRP1, INHBA, NKX3-1, CCL5, CTHRC1, LGALS9, FZD7, CCL8, IGFBP3, IFIT3, NAMPT, HLA-DMB, HLA-A, FAP, CXCL8, IL12RB1, IL31RA, HLA-G, IL12A, PTGS1, CEACAM1, ID2, FLT3LG, IL1A, TNFRSF1B, CD74, RARRES3, JAK2, PMAIP1, DHCR7, VCAM1, DLL1, ID4, KLF4, PKP2, TMEM119, APLN, RUNX2, EDNRB, CSF1, IFITM1, TNFSF13B, P…	96
GO:0002694	regulation of leukocyte activation	45/511	468/16792	2.87705e-11	2.13081e-09	1.60076e-10	HLA-DOA, HES1, CD274, TNFSF13B, PDCD1LG2, IL15RA, CD47, IDO1, PDE5A, SFRP1, IL15, TNFRSF14, WNT5A, INHBA, CCL5, LGALS9, IRF1, HLA-DMB, F2RL1, HLA-E, HLA-A, IL12RB1, HLA-DPA1, CD40, IL31RA, HLA-DPB1, HLA-DQA1, HLA-G, VNN1, HLA-DQB1, IL12A, IL7, CD24, ID2, CEACAM1, FLT3LG, CD38, CD74, EGR3, VCAM1, PLSCR1, HMOX1, GPNMB, IL27RA, HLA-DRA	45
GO:0080134	regulation of response to stress	84/511	1285/16792	3.31795e-11	2.42702e-09	1.82436e-10	GCH1, HPSE, STAT1, STAT2, UBASH3B, ZC3HAV1, IDO1, PML, SFRP1, IFIT1, NKX3-1, CCL5, LGALS9, FZD7, CCL8, DDX60, CCL7, CTSS, HLA-B, F2RL1, SKIL, HLA-A, FAP, IL12RB1, CADM1, AIM2, VNN1, IL12A, CASP4, CEACAM1, IL1A, CASP1, TNFRSF1B, SAMHD1, CD74, APOBEC3G, SVIP, JAK2, TRAFD1, PMAIP1, PSMB8, PARP9, A2M, PLSCR1, NMI, KLF4, DACT1, EDNRB, IFIH1, ABAT, HERC5, CD47, SOCS1, ERAP1, ADAMTS12, IL15, WNT5A, TGFB…	84
GO:0048002	antigen processing and presentation of peptide antigen	27/511	179/16792	3.43156e-11	2.47951e-09	1.86489e-10	HLA-DOA, TAP2, TAPBP, TAPBPL, TAP1, ERAP1, CTSS, HLA-C, HLA-B, HLA-DMB, HLA-DMA, HLA-F, HLA-E, PSMB10, HLA-A, PSMB9, HLA-DPA1, HLA-DPB1, HLA-G, HLA-DQA1, HLA-DQB1, PSME1, CD74, PSMB8, B2M, ERAP2, HLA-DRA	27
GO:0070663	regulation of leukocyte proliferation	29/511	208/16792	3.82078e-11	2.72748e-09	2.05254e-10	CSF1, HES1, CD274, TNFSF13B, PDCD1LG2, IDO1, PDE5A, TNFRSF14, IL15, CCL5, LGALS9, CCL8, IRF1, HLA-DMB, HLA-E, HLA-A, HLA-DPA1, IL12RB1, CD40, HLA-DPB1, HLA-G, IL7, IL12A, CD24, FLT3LG, CD38, CD74, VCAM1, GPNMB	29
GO:0051716	cellular response to stimulus	283/511	6927/16792	6.15401e-11	4.34078e-09	3.25685e-10	PATJ, PTGFR, PTGER2, STAT1, CMAHP, HES1, STAT2, CD274, CLIC2, PARVA, TNFSF10, PML, HHIP, CAP2, RBCK1, CCL5, APOL3, ZMAT3, FZD7, CCL8, CCL7, IGFBP3, NGEF, SKIL, RMI2, IL31RA, VNN1, PTGS1, PDZD8, FLT3LG, TSPAN13, PMAIP1, JAK2, A2M, PLSCR1, DLL1, RXFP1, MX2, APLN, CSF1, ADGRA3, ABAT, ADAM12, TNFRSF14, TGFB2, GUCY1A2, CX3CL1, CXCL5, GPC6, CXCL11, CXCL6, ANOS1, COL16A1, PTN, CD24, RALGPS2, DAAM1, GBP5…	283
GO:0019882	antigen processing and presentation	30/511	227/16792	6.20195e-11	4.32312e-09	3.25685e-10	HLA-DOA, TAP2, TAPBP, TAPBPL, ERAP1, TAP1, ICAM1, MICB, CTSS, HLA-C, HLA-B, HLA-DMB, HLA-DMA, HLA-F, RAB3B, HLA-E, HLA-A, PSMB10, PSMB9, HLA-DPA1, HLA-DPB1, HLA-G, HLA-DQA1, HLA-DQB1, PSME1, CD74, PSMB8, B2M, ERAP2, HLA-DRA	30
GO:0002483	antigen processing and presentation of endogenous peptide antigen	10/511	15/16792	8.72554e-11	6.01149e-09	4.53116e-10	HLA-C, TAP2, HLA-B, TAPBP, B2M, ERAP1, TAP1, ERAP2, HLA-E, HLA-A	10
GO:0002687	positive regulation of leukocyte migration	21/511	109/16792	9.03705e-11	6.15454e-09	4.64135e-10	CSF1, CXCL10, IL12A, PF4V1, IL1A, TNFRSF14, CD74, WNT5A, ICAM1, CCL5, CXCL9, LGALS9, CAMK1D, CXCL5, CXCL11, VEGFC, CCL8, CXCL6, CCL7, F2RL1, CXCL8	21
GO:0042098	T cell proliferation	26/511	174/16792	1.04613e-10	7.04353e-09	5.31442e-10	HES1, CD274, PDCD1LG2, TNFSF13B, IDO1, PDE5A, TNFRSF14, IL15, CCL5, LGALS9, IRF1, HLA-DMB, HLA-E, PSMB10, HLA-A, HLA-DPA1, IL12RB1, CADM1, HLA-DPB1, HLA-G, IL12A, BTN3A1, CD24, P2RX7, VCAM1, GPNMB	26
GO:0032943	mononuclear cell proliferation	32/511	265/16792	1.30254e-10	8.67143e-09	6.54589e-10	CSF1, HES1, CD274, TNFSF13B, PDCD1LG2, IDO1, PDE5A, TNFRSF14, IL15, CCL5, LGALS9, IRF1, HLA-DMB, HLA-E, HLA-A, PSMB10, IL12RB1, HLA-DPA1, CD40, CADM1, HLA-DPB1, HLA-G, IL12A, IL7, BTN3A1, CD24, CD38, CD74, P2RX7, VCAM1, GPNMB, AZI2	32
GO:1903901	negative regulation of viral life cycle	19/511	89/16792	1.47974e-10	9.74163e-09	7.35728e-10	ISG15, IFITM1, TRIM21, BST2, MX1, ZC3HAV1, OASL, PML, APOBEC3G, IFIT1, TRIM14, CCL5, PARP10, OAS1, PLSCR1, C19orf66, ISG20, RSAD2, OAS3	19
GO:0022603	regulation of anatomical structure morphogenesis	72/511	1051/16792	1.54175e-10	1.00383e-08	7.5849e-10	CXCL10, STAT1, HES1, STAT2, PARVA, TSPAN12, WARS, PML, NRCAM, SFRP1, ICAM1, CUX1, CTHRC1, TMEM100, FZD7, CCL7, NGEF, COL5A1, SKIL, PLXNC1, CXCL8, TBC1D1, PDZD8, CEACAM1, FLT3LG, IL1A, VRK2, PSMB8, DLL1, SEMA3F, COL1A1, KLF4, DACT1, SEMA6D, WASF3, CDC42SE2, PTPRD, RUNX2, GAS2, CSF1, TNFSF13B, ERAP1, ADAMTS12, WNT5A, SPARC, TGFB2, CX3CL1, VDR, POSTN, VEGFC, GPC6, SIX4, ATP10A, PSMB10, PSMB9, TENM4,…	72
GO:0002237	response to molecule of bacterial origin	35/511	316/16792	1.61501e-10	1.0401e-08	7.86253e-10	PDE4B, EDNRB, CXCL10, IL18BP, PTGFR, PTGER2, GCH1, IDO1, TNFRSF14, SPARC, WNT5A, ICAM1, CCL5, LGALS9, TNFRSF10D, CXCL5, CXCL11, CXCL6, CXCL8, FZD5, CD40, IL12A, CD24, PF4V1, CASP1, TNFRSF1B, JAK2, BMP6, P2RX7, CXCL9, VCAM1, CMPK2, CXCL16, B2M, THBD	35
GO:0008283	cell proliferation	106/511	1861/16792	1.73727e-10	1.10681e-08	8.37057e-10	PTGFR, LRP6, HES1, STAT1, BST2, CD274, PDCD1LG2, PML, SFRP1, HHIP, NKX3-1, CCL5, FZD7, CCL8, IGFBP3, NAMPT, F2RL1, IL31RA, CADM1, HLA-G, FLT3LG, IL1A, JAK2, PMAIP1, VCAM1, P2RX7, DLL1, ID4, TMEM119, APLN, EDNRB, CSF1, PDGFC, TNFSF13B, PDE5A, TNFRSF14, SPARC, TGFB2, CXCL5, VDR, VEGFC, SIX4, HLA-E, PSMB10, HLA-DPA1, HLA-DPB1, PTN, ACVR2A, CD24, PARP10, SEMA5A, EVI5, CCND2, AZI2, CXCL10, HPSE, RARRE…	106
GO:0022407	regulation of cell-cell adhesion	39/511	386/16792	1.81533e-10	1.14424e-08	8.65742e-10	HLA-DOA, HES1, CD274, TNFSF13B, PDCD1LG2, UBASH3B, KIF26B, ABAT, CD47, IDO1, PDE5A, TNFRSF14, IL15, WNT5A, CCL5, LGALS9, IRF1, HLA-DMB, PODXL, HLA-E, HLA-A, IL12RB1, HLA-DPA1, HLA-DPB1, HLA-DQA1, HLA-G, VNN1, HLA-DQB1, IL12A, IL7, CD24, CEACAM1, CD74, EGR3, JAK2, VCAM1, KLF4, GPNMB, HLA-DRA	39
GO:0048519	negative regulation of biological process	206/511	4623/16792	2.38747e-10	1.48903e-08	1.1271e-09	PTGFR, STAT1, HES1, CLIC2, CD274, TNFSF10, PML, HHIP, CCL5, RBCK1, FZD7, CCL8, NGEF, IGFBP3, SKIL, IL31RA, VNN1, FLT3LG, JAK2, PMAIP1, A2M, DLL1, PLSCR1, LXN, APLN, ABAT, HERC5, TNFRSF14, TGFB2, CX3CL1, CXCL11, ANOS1, PTN, FOXS1, CD24, CSRP3, PARP10, DEPTOR, GPR4, SERPING1, THBD, CXCL10, HLA-DOA, IL18BP, RARRES1, UBASH3B, OASL, IDO1, WARS, ICAM1, INHBA, VSNL1, LGALS9, BATF3, C19orf66, HLA-B, HLA-…	206
GO:0051270	regulation of cellular component movement	60/511	802/16792	2.65345e-10	1.63767e-08	1.24014e-09	CXCL10, GJA5, CD274, BST2, SFRP1, ICAM1, CCL5, LGALS9, ANK2, CCL8, CCL7, IGFBP3, CXCR4, F2RL1, CXCL8, PLXNC1, COL3A1, MMP10, IL12A, CEACAM1, CYGB, IL1A, CD74, JAK2, SEMA3F, COL1A1, KLF4, SEMA6D, CXCL16, PKP2, SPOCK3, DOCK10, PDE4B, CSF1, IFITM1, PDGFC, TNFRSF14, SPARC, WNT5A, DPYSL3, TGFB2, PTPRR, CX3CL1, CAMK1D, POSTN, CXCL5, CXCL11, VEGFC, CXCL6, PODXL, DDX58, TMEFF2, PTN, PF4V1, CXCL9, HMOX1, …	60
GO:0051249	regulation of lymphocyte activation	40/511	411/16792	3.04052e-10	1.85722e-08	1.40697e-09	HLA-DOA, HES1, CD274, TNFSF13B, PDCD1LG2, IL15RA, CD47, IDO1, PDE5A, SFRP1, TNFRSF14, IL15, INHBA, CCL5, LGALS9, IRF1, HLA-DMB, HLA-E, HLA-A, IL12RB1, HLA-DPA1, CD40, HLA-DPB1, HLA-DQA1, HLA-G, VNN1, HLA-DQB1, IL12A, IL7, CD24, ID2, CEACAM1, FLT3LG, CD38, CD74, EGR3, VCAM1, GPNMB, IL27RA, HLA-DRA	40
GO:0032944	regulation of mononuclear cell proliferation	27/511	199/16792	3.74564e-10	2.26458e-08	1.71627e-09	CSF1, HES1, CD274, TNFSF13B, PDCD1LG2, IDO1, PDE5A, TNFRSF14, IL15, CCL5, LGALS9, IRF1, HLA-DMB, HLA-E, HLA-A, HLA-DPA1, IL12RB1, CD40, HLA-DPB1, HLA-G, IL7, IL12A, CD24, CD38, CD74, VCAM1, GPNMB	27
GO:0030334	regulation of cell migration	54/511	685/16792	3.88608e-10	2.32576e-08	1.76333e-09	CXCL10, CD274, BST2, SFRP1, ICAM1, CCL5, LGALS9, CCL8, IGFBP3, CCL7, CXCR4, F2RL1, CXCL8, PLXNC1, COL3A1, MMP10, IL12A, CEACAM1, CYGB, IL1A, CD74, JAK2, SEMA3F, COL1A1, KLF4, SEMA6D, CXCL16, PKP2, DOCK10, CSF1, IFITM1, PDGFC, TNFRSF14, SPARC, WNT5A, DPYSL3, TGFB2, PTPRR, CX3CL1, CAMK1D, POSTN, CXCL5, CXCL11, VEGFC, CXCL6, PODXL, DDX58, TMEFF2, PTN, PF4V1, CXCL9, HMOX1, SEMA5A, GPNMB	54
GO:0048522	positive regulation of cellular process	209/511	4744/16792	4.54176e-10	2.69099e-08	2.04103e-09	PTGFR, GSAP, STAT1, HES1, CLIC2, CD274, TNFSF10, PML, NRCAM, CAP2, CCL5, RBCK1, APOL3, FZD7, ZMAT3, CCL8, NGEF, IGFBP3, CCL7, SKIL, IL31RA, SULT1E1, VNN1, FLT3LG, JAK2, PMAIP1, DLL1, PLSCR1, TMEM119, APLN, CSF1, ABAT, TNFRSF14, TGFB2, GUCY1A2, CX3CL1, CXCL5, CXCL11, CXCL6, HELZ2, ALDH1A3, COL16A1, PTN, CD24, CSRP3, C2, GBP5, GPR4, FGD4, LRRN3, CASP10, CXCL10, RNF114, HPSE, IDO1, ICAM1, INHBA, VSN…	209
GO:0046651	lymphocyte proliferation	31/511	263/16792	4.83456e-10	2.83612e-08	2.15193e-09	HES1, CD274, TNFSF13B, PDCD1LG2, IDO1, PDE5A, TNFRSF14, IL15, CCL5, LGALS9, IRF1, HLA-DMB, HLA-E, HLA-A, PSMB10, IL12RB1, HLA-DPA1, CD40, CADM1, HLA-DPB1, HLA-G, IL7, IL12A, BTN3A1, CD24, CD38, CD74, P2RX7, VCAM1, GPNMB, AZI2	31
GO:0040011	locomotion	91/511	1530/16792	5.97558e-10	3.47111e-08	2.63472e-09	CXCL10, STAT1, HES1, BST2, CD274, PARVA, KIF26B, PML, SLC7A11, NRCAM, SFRP1, ENAH, ICAM1, CCL5, CTHRC1, LGALS9, CXADR, RHOC, CCL8, CCL7, IGFBP3, CXCR4, COL5A1, F2RL1, FAP, PLXNC1, CXCL8, COL3A1, MMP10, IL12A, CYGB, CEACAM1, ID2, IL1A, CD74, JAK2, PARP9, VCAM1, SEMA3F, COL1A1, KLF4, SEMA6D, CXCL16, PKP2, DOCK10, SPOCK3, PDE4B, ACKR4, EDNRB, EXT1, CSF1, EGR2, IFITM1, PDGFC, CD47, ADAMTS12, TNFRSF14…	91
GO:2000145	regulation of cell motility	56/511	736/16792	6.35486e-10	3.65559e-08	2.77576e-09	CXCL10, CD274, BST2, SFRP1, ICAM1, CCL5, LGALS9, CCL8, IGFBP3, CCL7, CXCR4, F2RL1, CXCL8, PLXNC1, COL3A1, MMP10, IL12A, CEACAM1, CYGB, IL1A, CD74, JAK2, SEMA3F, COL1A1, KLF4, SEMA6D, CXCL16, PKP2, SPOCK3, DOCK10, CSF1, IFITM1, PDGFC, TNFRSF14, SPARC, WNT5A, DPYSL3, TGFB2, PTPRR, CX3CL1, CAMK1D, POSTN, CXCL5, CXCL11, VEGFC, CXCL6, PODXL, DDX58, TMEFF2, PTN, PF4V1, CXCL9, CDK6, HMOX1, SEMA5A, GPNMB	56
GO:0032103	positive regulation of response to external stimulus	31/511	267/16792	6.97452e-10	3.97346e-08	3.01821e-09	CXCL10, CSF1, ZC3HAV1, CD47, IDO1, IL15, WNT5A, CCL5, LGALS9, CX3CL1, CAMK1D, CXCL5, CXCL11, DDX60, VEGFC, CCL8, CXCL6, CCL7, F2RL1, CXCL8, IL12A, DHX58, PF4V1, CD74, BMP6, JAK2, GBP5, CXCL9, TLR3, SEMA5A, THBD	31
GO:0032496	response to lipopolysaccharide	33/511	302/16792	8.3302e-10	4.70061e-08	3.57181e-09	PDE4B, EDNRB, CXCL10, IL18BP, PTGFR, GCH1, PTGER2, IDO1, TNFRSF14, SPARC, WNT5A, ICAM1, CCL5, LGALS9, TNFRSF10D, CXCL5, CXCL11, CXCL6, CXCL8, CD40, IL12A, PF4V1, CASP1, TNFRSF1B, JAK2, BMP6, P2RX7, CXCL9, VCAM1, CMPK2, CXCL16, B2M, THBD	33
GO:0048856	anatomical structure development	232/511	5473/16792	8.8608e-10	4.95285e-08	3.76478e-09	STAT1, HES1, STAT2, PARVA, TNFSF10, PML, SLC7A11, NRCAM, HHIP, ENAH, CAP2, DRP2, FZD7, NGEF, IGFBP3, CCL7, SKIL, IL31RA, APOL2, VNN1, PDZD8, FLT3LG, JAK2, DHCR7, DLL1, RXFP1, TMEM119, APLN, CSF1, ABAT, DAW1, ADAM12, TNFRSF14, TGFB2, SERINC5, CX3CL1, GPC6, ALDH1A3, ANOS1, PTN, FOXS1, PALMD, CD24, MTURN, CSRP3, DAAM1, DSP, ADAM23, SDC2, GPR4, FGD4, LRRN3, CASP10, CXCL10, HLA-DOA, HPSE, RNF114, PRR1…	232
GO:0009617	response to bacterium	46/511	544/16792	1.11327e-09	6.16461e-08	4.68746e-09	PDE4B, EDNRB, IL18BP, CXCL10, PTGFR, PTGER2, GCH1, CD47, ERAP1, IDO1, TNFRSF14, SPARC, WNT5A, ICAM1, CCL5, LGALS9, TNFRSF10D, CXCL5, CXCL11, CXCL6, HLA-B, BAIAP2L1, F2RL1, HLA-E, HLA-A, CXCL8, FZD5, CD40, ISG15, GSDMD, IL12A, CD24, PF4V1, CASP1, TNFRSF1B, JAK2, BMP6, P2RX7, CXCL9, VCAM1, CMPK2, TLR3, CXCL16, B2M, IL27RA, THBD	46
GO:0070665	positive regulation of leukocyte proliferation	22/511	139/16792	1.30067e-09	7.13562e-08	5.42761e-09	IL12RB1, HLA-DPA1, CD40, CSF1, HLA-DPB1, IL12A, IL7, HES1, CD274, CD24, TNFSF13B, PDCD1LG2, FLT3LG, CD38, CD74, IL15, VCAM1, CCL5, LGALS9, HLA-DMB, HLA-E, HLA-A	22
GO:0050670	regulation of lymphocyte proliferation	26/511	198/16792	1.68976e-09	9.18518e-08	6.98886e-09	HES1, CD274, PDCD1LG2, TNFSF13B, IDO1, PDE5A, TNFRSF14, IL15, CCL5, LGALS9, IRF1, HLA-DMB, HLA-E, HLA-A, HLA-DPA1, IL12RB1, CD40, HLA-DPB1, HLA-G, IL7, IL12A, CD24, CD38, CD74, VCAM1, GPNMB	26
GO:0002521	leukocyte differentiation	42/511	474/16792	1.73298e-09	9.33448e-08	7.10475e-09	CASP10, RUNX2, HLA-DOA, CSF1, SOX4, UBASH3B, IL15RA, ITK, SFRP1, IL15, INHBA, BATF2, LGALS9, BATF3, FZD7, RBP1, HLA-B, IRF1, F2RL1, RASSF2, IL12RB1, FZD5, IL31RA, HLA-G, LRRC17, VNN1, PIR, IL12A, IL7, ID2, CEACAM1, FLT3LG, CD74, EGR3, VCAM1, DLL1, CDK6, TLR3, B2M, AZI2, IRF7, RSAD2	42
GO:0032609	interferon-gamma production	19/511	103/16792	1.80804e-09	9.65102e-08	7.348e-09	PDE4B, HLA-DPA1, IL12RB1, FZD5, HLA-DPB1, BTN3A2, IL12A, CD274, BTN3A1, PDCD1LG2, ITK, WNT5A, INHBA, LGALS9, TLR3, F2RL1, AZI2, HLA-A, IL27RA	19
GO:1903037	regulation of leukocyte cell-cell adhesion	33/511	313/16792	2.04065e-09	1.07954e-07	8.22187e-09	HLA-DOA, HES1, CD274, TNFSF13B, PDCD1LG2, CD47, IDO1, PDE5A, TNFRSF14, IL15, CCL5, LGALS9, IRF1, HLA-DMB, HLA-E, HLA-A, IL12RB1, HLA-DPA1, HLA-DPB1, HLA-DQA1, HLA-G, VNN1, IL7, IL12A, HLA-DQB1, CD24, CEACAM1, CD74, EGR3, VCAM1, KLF4, GPNMB, HLA-DRA	33
GO:0002474	antigen processing and presentation of peptide antigen via MHC class I	18/511	92/16792	2.09867e-09	1.10041e-07	8.38337e-09	HLA-G, HLA-DQB1, TAP2, TAPBP, TAPBPL, PSME1, TAP1, ERAP1, PSMB8, HLA-C, HLA-B, B2M, HLA-F, ERAP2, HLA-E, HLA-A, PSMB10, PSMB9	18
GO:0045069	regulation of viral genome replication	17/511	81/16792	2.25674e-09	1.17291e-07	8.9384e-09	ISG15, IFITM1, BST2, MX1, OASL, ZC3HAV1, APOBEC3G, IFIT1, CCL5, PARP10, OAS1, PLSCR1, C19orf66, ISG20, RSAD2, OAS3, CXCL8	17
GO:0022409	positive regulation of cell-cell adhesion	29/511	248/16792	2.33719e-09	1.20416e-07	9.17924e-09	HES1, CD274, TNFSF13B, PDCD1LG2, KIF26B, CD47, TNFRSF14, IL15, WNT5A, CCL5, LGALS9, HLA-DMB, PODXL, HLA-E, HLA-A, HLA-DPA1, IL12RB1, HLA-DPB1, HLA-G, HLA-DQA1, VNN1, IL7, IL12A, HLA-DQB1, CD24, CD74, EGR3, VCAM1, HLA-DRA	29
GO:0050863	regulation of T cell activation	32/511	299/16792	2.61187e-09	1.33408e-07	1.01725e-08	HLA-DOA, HES1, CD274, TNFSF13B, PDCD1LG2, CD47, IDO1, PDE5A, TNFRSF14, IL15, CCL5, LGALS9, IRF1, HLA-DMB, HLA-E, HLA-A, HLA-DPA1, IL12RB1, HLA-DPB1, HLA-DQA1, HLA-G, VNN1, IL7, IL12A, HLA-DQB1, CD24, CEACAM1, CD74, EGR3, VCAM1, GPNMB, HLA-DRA	32
GO:0002690	positive regulation of leukocyte chemotaxis	17/511	82/16792	2.7264e-09	1.38068e-07	1.05308e-08	CSF1, CXCL10, IL12A, PF4V1, CD74, WNT5A, CCL5, CXCL9, LGALS9, CAMK1D, CXCL5, CXCL11, VEGFC, CXCL6, CCL7, F2RL1, CXCL8	17
GO:0040012	regulation of locomotion	56/511	768/16792	2.9336e-09	1.47302e-07	1.12383e-08	CXCL10, CD274, BST2, SFRP1, ICAM1, CCL5, LGALS9, CCL8, IGFBP3, CCL7, CXCR4, F2RL1, CXCL8, PLXNC1, COL3A1, MMP10, IL12A, CEACAM1, CYGB, IL1A, CD74, JAK2, SEMA3F, COL1A1, KLF4, SEMA6D, CXCL16, PKP2, SPOCK3, DOCK10, CSF1, IFITM1, PDGFC, TNFRSF14, SPARC, WNT5A, DPYSL3, TGFB2, PTPRR, CX3CL1, CAMK1D, POSTN, CXCL5, CXCL11, VEGFC, CXCL6, PODXL, DDX58, TMEFF2, PTN, PF4V1, CXCL9, CDK6, HMOX1, SEMA5A, GPNMB	56
GO:0060326	cell chemotaxis	29/511	251/16792	3.06507e-09	1.51338e-07	1.15525e-08	PDE4B, EDNRB, CXCL10, CSF1, PARVA, WNT5A, TGFB2, CCL5, LGALS9, CXADR, CX3CL1, CAMK1D, CXCL5, CXCL11, VEGFC, CCL8, CXCL6, CCL7, CXCR4, F2RL1, CXCL8, IL12A, PF4V1, CD74, EGR3, CXCL9, VCAM1, SEMA5A, CXCL16	29
GO:0032946	positive regulation of mononuclear cell proliferation	21/511	133/16792	3.50312e-09	1.71537e-07	1.30864e-08	IL12RB1, HLA-DPA1, CD40, CSF1, HLA-DPB1, IL12A, HES1, IL7, CD274, CD24, TNFSF13B, PDCD1LG2, CD38, CD74, IL15, VCAM1, CCL5, LGALS9, HLA-DMB, HLA-E, HLA-A	21
GO:0050867	positive regulation of cell activation	33/511	320/16792	3.52802e-09	1.7134e-07	1.30864e-08	HES1, CD274, TNFSF13B, PDCD1LG2, IL15RA, CD47, TNFRSF14, IL15, WNT5A, CCL5, LGALS9, HLA-DMB, F2RL1, HLA-E, HLA-A, IL12RB1, HLA-DPA1, CD40, HLA-DPB1, HLA-DQA1, HLA-G, VNN1, HLA-DQB1, IL7, IL12A, CD24, FLT3LG, CD38, CD74, EGR3, JAK2, VCAM1, HLA-DRA	33
GO:0002478	antigen processing and presentation of exogenous peptide antigen	23/511	162/16792	4.11871e-09	1.98401e-07	1.51571e-08	HLA-DPA1, HLA-DOA, HLA-DPB1, HLA-DQA1, HLA-G, HLA-DQB1, TAP2, PSME1, TAP1, CD74, PSMB8, CTSS, HLA-C, HLA-B, HLA-DMB, B2M, HLA-DMA, HLA-F, HLA-E, HLA-A, PSMB10, HLA-DRA, PSMB9	23
GO:0050900	leukocyte migration	36/511	376/16792	4.28451e-09	2.04724e-07	1.56441e-08	PDE4B, EDNRB, CXCL10, CSF1, CD47, SLC7A11, TNFRSF14, WNT5A, ICAM1, TGFB2, CCL5, LGALS9, CXADR, CX3CL1, CAMK1D, CXCL5, CCL8, CXCL11, VEGFC, CCL7, CXCL6, CXCR4, F2RL1, PODXL, CXCL8, IL12A, CEACAM1, PF4V1, IL1A, CD74, CXCL9, VCAM1, HMOX1, COL1A1, CXCL16, THBD	36
GO:0001818	negative regulation of cytokine production	27/511	223/16792	4.44697e-09	2.10786e-07	1.61114e-08	IFIH1, RNF128, CD274, BST2, PDCD1LG2, HERC5, UBE2L6, IDO1, PML, INHBA, TGFB2, LGALS9, F2RL1, DDX58, ISG15, GBP1, IL12A, CD24, CEACAM1, ASB1, DHX58, DLL1, HMOX1, NMI, KLF4, NLRC5, GPNMB	27
GO:0016477	cell migration	74/511	1184/16792	4.62056e-09	2.17276e-07	1.66116e-08	CXCL10, STAT1, HES1, BST2, CD274, PARVA, PML, SLC7A11, NRCAM, SFRP1, ICAM1, CCL5, CXADR, CTHRC1, LGALS9, RHOC, CCL8, CCL7, IGFBP3, CXCR4, COL5A1, F2RL1, FAP, CXCL8, COL3A1, IL12A, CYGB, CEACAM1, IL1A, CD74, JAK2, PARP9, VCAM1, SEMA3F, COL1A1, KLF4, SEMA6D, CXCL16, PKP2, PDE4B, EDNRB, CSF1, IFITM1, PDGFC, CD47, ADAMTS12, TNFRSF14, DPYSL3, SPARC, WNT5A, TGFB2, PTPRR, CAMK1D, CX3CL1, POSTN, CXCL5, V…	74
GO:0032502	developmental process	234/511	5632/16792	5.1307e-09	2.39366e-07	1.81963e-08	STAT1, HES1, STAT2, PARVA, TNFSF10, PML, SLC7A11, NRCAM, HHIP, ENAH, CAP2, DRP2, FZD7, NGEF, IGFBP3, CCL7, SKIL, IL31RA, APOL2, VNN1, PDZD8, FLT3LG, JAK2, DHCR7, DLL1, RXFP1, TMEM119, APLN, CSF1, ABAT, DAW1, ADAM12, TNFRSF14, TGFB2, SERINC5, CX3CL1, GPC6, ALDH1A3, ANOS1, PTN, FOXS1, PALMD, CD24, MTURN, CSRP3, DAAM1, DSP, ADAM23, SDC2, GPR4, FGD4, SERPING1, LRRN3, CASP10, CXCL10, HLA-DOA, HPSE, RN…	234
GO:0048870	cell motility	80/511	1330/16792	5.17815e-09	2.39692e-07	1.81963e-08	CXCL10, STAT1, HES1, BST2, CD274, PARVA, PML, SLC7A11, NRCAM, SFRP1, ICAM1, CCL5, CXADR, CTHRC1, LGALS9, RHOC, CCL8, CCL7, IGFBP3, CXCR4, COL5A1, F2RL1, FAP, PLXNC1, CXCL8, COL3A1, MMP10, IL12A, CYGB, CEACAM1, IL1A, CD74, JAK2, PARP9, VCAM1, SEMA3F, COL1A1, KLF4, SEMA6D, CXCL16, PKP2, DOCK10, SPOCK3, PDE4B, EDNRB, CSF1, IFITM1, PDGFC, CD47, ADAMTS12, TNFRSF14, DPYSL3, WNT5A, SPARC, TGFB2, PTPRR, …	80
GO:0051674	localization of cell	80/511	1330/16792	5.17815e-09	2.39692e-07	1.81963e-08	CXCL10, STAT1, HES1, BST2, CD274, PARVA, PML, SLC7A11, NRCAM, SFRP1, ICAM1, CCL5, CXADR, CTHRC1, LGALS9, RHOC, CCL8, CCL7, IGFBP3, CXCR4, COL5A1, F2RL1, FAP, PLXNC1, CXCL8, COL3A1, MMP10, IL12A, CYGB, CEACAM1, IL1A, CD74, JAK2, PARP9, VCAM1, SEMA3F, COL1A1, KLF4, SEMA6D, CXCL16, PKP2, DOCK10, SPOCK3, PDE4B, EDNRB, CSF1, IFITM1, PDGFC, CD47, ADAMTS12, TNFRSF14, DPYSL3, WNT5A, SPARC, TGFB2, PTPRR, …	80
GO:0030595	leukocyte chemotaxis	25/511	194/16792	5.41345e-09	2.48641e-07	1.88811e-08	PDE4B, EDNRB, CXCL10, CSF1, IL12A, PF4V1, CD74, WNT5A, TGFB2, CCL5, CXCL9, LGALS9, CXADR, CAMK1D, CX3CL1, CXCL5, CXCL11, VEGFC, CCL8, CXCL6, CCL7, CXCR4, F2RL1, CXCL16, CXCL8	25
GO:0050870	positive regulation of T cell activation	26/511	210/16792	5.74193e-09	2.61699e-07	1.98785e-08	HES1, CD274, PDCD1LG2, TNFSF13B, CD47, TNFRSF14, IL15, CCL5, LGALS9, HLA-DMB, HLA-E, HLA-A, HLA-DPA1, IL12RB1, HLA-DPB1, HLA-G, HLA-DQA1, VNN1, IL7, IL12A, HLA-DQB1, CD24, CD74, EGR3, VCAM1, HLA-DRA	26
GO:0042129	regulation of T cell proliferation	22/511	151/16792	6.0278e-09	2.72631e-07	2.07147e-08	IL12RB1, HLA-DPA1, HLA-DPB1, HLA-G, IL12A, HES1, CD274, CD24, TNFSF13B, PDCD1LG2, IDO1, PDE5A, TNFRSF14, IL15, VCAM1, CCL5, LGALS9, IRF1, HLA-DMB, GPNMB, HLA-E, HLA-A	22
GO:0010647	positive regulation of cell communication	89/511	1555/16792	6.3641e-09	2.85661e-07	2.17108e-08	CASP10, CXCL10, LRP6, HPSE, GJA5, SOX4, HES1, BST2, OXTR, MYRIP, TNFSF10, ZC3HAV1, PML, SFRP1, ICAM1, INHBA, NKX3-1, VSNL1, CCL5, RBCK1, LGALS9, RHOC, APOL3, FZD7, CCL8, DDX60, CCL7, IGFBP3, LMCD1, CXCR4, F2RL1, SKIL, F2RL2, SECTM1, PELI2, COL3A1, IL31RA, IL12A, AGO1, IL1A, CASP1, TNFRSF1B, CD74, JAK2, PMAIP1, PSMB8, P2RX7, DLL1, COL1A1, DACT1, APLN, CSF1, PDGFC, ABAT, SOCS1, PDE5A, IL15, TNFRSF1…	89
GO:0009888	tissue development	97/511	1756/16792	6.60052e-09	2.94046e-07	2.23542e-08	ARHGEF26, LRP6, VAMP5, HES1, STAT1, SLC7A11, PML, SFRP1, HHIP, NKX3-1, CXADR, NUMA1, FZD7, NAMPT, COL5A1, SKIL, F2RL1, IL31RA, COL3A1, ISG15, SALL2, MMP8, JAK2, P2RX7, DLL1, SEMA3F, RXFP1, COL1A1, ID4, SEMA6D, TMEM119, EDNRB, CSF1, ANKH, GSTK1, TGFB2, VDR, GPC6, VEGFC, TDRD7, MUC1, SIX4, PODXL, PSMB10, PSMB9, ALDH1A3, PTN, ACVR2A, CD24, CSRP3, DAAM1, DSP, SEMA5A, GPR4, HPSE, GJA5, SOX4, KIF26B, I…	97
GO:0002696	positive regulation of leukocyte activation	32/511	311/16792	6.7438e-09	2.98187e-07	2.26751e-08	HES1, CD274, TNFSF13B, PDCD1LG2, IL15RA, CD47, TNFRSF14, IL15, WNT5A, CCL5, LGALS9, HLA-DMB, F2RL1, HLA-E, HLA-A, IL12RB1, HLA-DPA1, CD40, HLA-DPB1, HLA-DQA1, HLA-G, VNN1, IL7, IL12A, HLA-DQB1, CD24, FLT3LG, CD38, CD74, EGR3, VCAM1, HLA-DRA	32
GO:0044767	single-organism developmental process	228/511	5475/16792	8.30526e-09	3.64508e-07	2.77258e-08	STAT1, HES1, PARVA, TNFSF10, SLC7A11, PML, NRCAM, HHIP, ENAH, CAP2, DRP2, FZD7, NGEF, IGFBP3, CCL7, SKIL, IL31RA, APOL2, VNN1, FLT3LG, JAK2, DHCR7, DLL1, RXFP1, TMEM119, APLN, CSF1, ABAT, DAW1, ADAM12, TNFRSF14, TGFB2, SERINC5, CX3CL1, GPC6, ALDH1A3, ANOS1, PTN, FOXS1, PALMD, CD24, MTURN, CSRP3, DAAM1, DSP, ADAM23, SDC2, GPR4, SERPING1, FGD4, LRRN3, CASP10, CXCL10, HLA-DOA, HPSE, RNF114, PRR15, U…	228
GO:0034612	response to tumor necrosis factor	29/511	263/16792	8.69884e-09	3.78975e-07	2.88338e-08	IL18BP, GCH1, STAT1, TNFSF13B, ADAMTS12, TNFRSF14, SFRP1, ICAM1, NKX3-1, CCL5, CX3CL1, TNFRSF10D, POSTN, CCL8, CCL7, F2RL1, PSMB10, CXCL8, PSMB9, CD40, AIM2, NUB1, PSME1, TNFRSF1B, PSMB8, JAK2, VCAM1, COL1A1, CXCL16	29
GO:0019884	antigen processing and presentation of exogenous antigen	23/511	169/16792	9.14819e-09	3.95643e-07	3.01097e-08	HLA-DPA1, HLA-DOA, HLA-DPB1, HLA-DQA1, HLA-G, HLA-DQB1, TAP2, PSME1, TAP1, CD74, PSMB8, CTSS, HLA-C, HLA-B, HLA-DMB, B2M, HLA-DMA, HLA-F, HLA-E, HLA-A, PSMB10, HLA-DRA, PSMB9	23
GO:0033993	response to lipid	59/511	860/16792	9.54003e-09	4.09599e-07	3.11798e-08	IL18BP, CXCL10, LRP6, PTGFR, PTGER2, GCH1, PAPPA, OXTR, IDO1, SFRP1, ICAM1, INHBA, NKX3-1, CCL5, LGALS9, FZD7, RBP1, CXCL8, IL12A, CASP1, TNFRSF1B, JAK2, VCAM1, P2RX7, COL1A1, KLF4, CXCL16, PDE4B, EDNRB, FBXO32, IL15, TNFRSF14, SPARC, WNT5A, TGFB2, TNFRSF10D, MICB, VDR, POSTN, CXCL5, CXCL11, CXCL6, MUC1, MGARP, CD40, PMEPA1, PTN, EPHA5, TNC, GHR, PF4V1, CD38, BMP6, CXCL9, CMPK2, CDK6, IFI27, B2M,…	59
GO:0002685	regulation of leukocyte migration	22/511	156/16792	1.08982e-08	4.61226e-07	3.51273e-08	CXCL10, CSF1, IL12A, PF4V1, IL1A, TNFRSF14, CD74, WNT5A, ICAM1, CCL5, CXCL9, HMOX1, LGALS9, CAMK1D, CXCL5, CXCL11, VEGFC, CCL8, CXCL6, CCL7, F2RL1, CXCL8	22
GO:0048731	system development	188/511	4291/16792	1.17252e-08	4.92709e-07	3.75342e-08	VAMP5, LRP6, STAT1, HES1, PARVA, RNF213, OXTR, TNFSF10, PML, SLC7A11, NRCAM, SFRP1, HHIP, ENAH, GLRB, NKX3-1, CUX1, CXADR, NUMA1, ANK2, DRP2, FZD7, NGEF, NAMPT, RBP1, COL5A1, F2RL1, SKIL, FOXG1, PLXNC1, CADM1, IL31RA, COL3A1, ISG15, HLA-G, VNN1, SALL2, PIR, ZHX2, FLT3LG, IL1A, JAK2, DHCR7, P2RX7, VCAM1, DLL1, SEMA3F, RXFP1, COL1A1, ID4, WASF3, SEMA6D, TMEM119, APLN, EDNRB, CSF1, ANKH, PDGFC, ABAT…	188
GO:0002520	immune system development	57/511	821/16792	1.18645e-08	4.95049e-07	3.77217e-08	CASP10, HLA-DOA, HES1, SOX4, UBASH3B, PML, IDO1, SFRP1, INHBA, BATF2, LGALS9, BATF3, FZD7, RBP1, HLA-B, F2RL1, IL12RB1, IL31RA, ISG15, HLA-G, VNN1, LRRC17, IL12A, PIR, ID2, CEACAM1, FLT3LG, CD74, JAK2, VCAM1, DLL1, KLF4, RUNX2, CSF1, IL15RA, ITK, IL15, WNT5A, MFAP5, TGFB2, CDKN2B, HERC6, SIX4, IRF1, RASSF2, FZD5, CD40, IL7, ACVR2A, EGR3, CDK6, TLR3, B2M, AZI2, IRF7, RSAD2, IL27RA	57
GO:0043901	negative regulation of multi-organism process	22/511	157/16792	1.22315e-08	5.06794e-07	3.86257e-08	ISG15, IFITM1, STAT1, TRIM21, BST2, MX1, ZC3HAV1, OASL, PML, DHX58, APOBEC3G, IFIT1, TRIM14, CCL5, PARP10, OAS1, PLSCR1, MICB, C19orf66, ISG20, RSAD2, OAS3	22
GO:1903039	positive regulation of leukocyte cell-cell adhesion	26/511	218/16792	1.23913e-08	5.09852e-07	3.88679e-08	HES1, CD274, PDCD1LG2, TNFSF13B, CD47, TNFRSF14, IL15, CCL5, LGALS9, HLA-DMB, HLA-E, HLA-A, HLA-DPA1, IL12RB1, HLA-DPB1, HLA-G, HLA-DQA1, VNN1, IL7, IL12A, HLA-DQB1, CD24, CD74, EGR3, VCAM1, HLA-DRA	26
GO:0002456	T cell mediated immunity	16/511	79/16792	1.26796e-08	5.18113e-07	3.95069e-08	IL12RB1, FZD5, CADM1, IL31RA, BTN3A2, IL12A, CEACAM1, ICAM1, BTN3A3, P2RX7, MICB, HLA-B, B2M, HLA-E, HLA-A, RSAD2	16
GO:0030097	hemopoiesis	53/511	739/16792	1.49295e-08	6.05872e-07	4.62092e-08	CASP10, HLA-DOA, HES1, SOX4, UBASH3B, PML, SFRP1, INHBA, BATF2, LGALS9, BATF3, FZD7, RBP1, HLA-B, F2RL1, IL12RB1, IL31RA, ISG15, HLA-G, VNN1, LRRC17, PIR, IL12A, ID2, CEACAM1, FLT3LG, CD74, JAK2, VCAM1, DLL1, KLF4, RUNX2, CSF1, IL15RA, ITK, IL15, WNT5A, MFAP5, TGFB2, CDKN2B, HERC6, IRF1, RASSF2, FZD5, IL7, ACVR2A, EGR3, CDK6, TLR3, B2M, AZI2, IRF7, RSAD2	53
GO:0051251	positive regulation of lymphocyte activation	30/511	287/16792	1.53431e-08	6.18422e-07	4.7177e-08	HES1, CD274, TNFSF13B, PDCD1LG2, IL15RA, CD47, TNFRSF14, IL15, CCL5, LGALS9, HLA-DMB, HLA-E, HLA-A, HLA-DPA1, IL12RB1, CD40, HLA-DPB1, HLA-DQA1, HLA-G, VNN1, IL7, IL12A, HLA-DQB1, CD24, FLT3LG, CD38, CD74, EGR3, VCAM1, HLA-DRA	30
GO:0048513	animal organ development	147/511	3129/16792	1.60832e-08	6.43871e-07	4.91293e-08	VAMP5, LRP6, STAT1, HES1, OXTR, PARVA, TNFSF10, SLC7A11, PML, SFRP1, HHIP, NKX3-1, CXADR, NUMA1, ANK2, FZD7, RBP1, NAMPT, COL5A1, F2RL1, SKIL, FOXG1, CADM1, COL3A1, IL31RA, ISG15, HLA-G, VNN1, SALL2, PIR, FLT3LG, JAK2, DHCR7, P2RX7, VCAM1, DLL1, RXFP1, SEMA3F, COL1A1, ID4, SEMA6D, TMEM119, APLN, EDNRB, CSF1, ANKH, PDGFC, ABAT, DAW1, SPARC, TGFB2, HERC6, VDR, VEGFC, GPC6, SIX4, TDRD7, ETV7, PODXL,…	147
GO:0042330	taxis	44/511	553/16792	1.68839e-08	6.71389e-07	5.12402e-08	PDE4B, ACKR4, EDNRB, CXCL10, CSF1, EXT1, EGR2, PARVA, KIF26B, NRCAM, ENAH, WNT5A, TGFB2, CCL5, CXADR, LGALS9, TYMP, CX3CL1, CAMK1D, CXCL5, CCL8, VEGFC, CXCL11, CCL7, CXCL6, CXCR4, F2RL1, CXCL8, PLXNC1, ANOS1, EPHA5, IL12A, ID2, PF4V1, CD74, EGR3, CXCL9, VCAM1, SEMA3F, SEMA5A, SEMA6D, CXCL16, GPNMB, ACKR3	44
GO:0023056	positive regulation of signaling	88/511	1563/16792	1.71921e-08	6.7909e-07	5.18391e-08	CASP10, CXCL10, LRP6, HPSE, SOX4, HES1, BST2, OXTR, MYRIP, TNFSF10, ZC3HAV1, PML, SFRP1, ICAM1, INHBA, NKX3-1, VSNL1, CCL5, RBCK1, LGALS9, RHOC, APOL3, FZD7, CCL8, DDX60, CCL7, IGFBP3, LMCD1, CXCR4, F2RL1, SKIL, F2RL2, SECTM1, PELI2, COL3A1, IL31RA, IL12A, AGO1, IL1A, CASP1, TNFRSF1B, CD74, JAK2, PMAIP1, PSMB8, P2RX7, DLL1, COL1A1, DACT1, APLN, CSF1, PDGFC, ABAT, SOCS1, PDE5A, IL15, TNFRSF14, WNT…	88
GO:0050671	positive regulation of lymphocyte proliferation	20/511	132/16792	1.80515e-08	7.08312e-07	5.40814e-08	IL12RB1, HLA-DPA1, CD40, HLA-DPB1, IL12A, HES1, IL7, CD274, CD24, TNFSF13B, PDCD1LG2, CD38, CD74, IL15, VCAM1, CCL5, LGALS9, HLA-DMB, HLA-E, HLA-A	20
GO:0045595	regulation of cell differentiation	87/511	1544/16792	2.0694e-08	8.06655e-07	6.16032e-08	HLA-DOA, CXCL10, STAT1, HES1, UBASH3B, NRCAM, SFRP1, INHBA, CUX1, CTHRC1, LGALS9, INSIG1, TMEM100, FZD7, IGFBP3, NGEF, RBP1, CXCR4, HLA-B, COL5A1, SKIL, PLXNC1, IL12RB1, COL3A1, ISG15, SULT1E1, HLA-G, VNN1, LRRC17, IL12A, RBM24, ZHX2, CEACAM1, ID2, FLT3LG, CD74, JAK2, EID1, DLL1, SEMA3F, ID4, COL1A1, KLF4, SEMA6D, PKP2, TMEM119, PTPRD, RUNX2, EDNRB, CSF1, IFITM1, BHLHE41, NEGR1, RFLNB, IL15RA, AD…	87
GO:0035556	intracellular signal transduction	129/511	2657/16792	2.8381e-08	1.09907e-06	8.39518e-08	PATJ, ARHGEF26, PTGFR, STAT1, HES1, CLIC2, STAT2, BST2, OXTR, TNFSF10, PML, SFRP1, NKX3-1, CCL5, RBCK1, ANK2, APOL3, FZD7, ZMAT3, CCL8, IGFBP3, NGEF, CCL7, LMCD1, F2RL1, SKIL, F2RL2, RMI2, PELI2, ARHGAP20, COL3A1, IL31RA, VNN1, PDZD8, IL1A, JAK2, PMAIP1, VCAM1, A2M, P2RX7, IFIH1, EDNRB, CSF1, PDGFC, SHC3, SOCS1, PDE5A, TNFRSF14, TGFB2, PTPRR, GUCY1A2, CX3CL1, ARHGEF37, CXCL11, MUC1, DDX58, PSMB10…	129
GO:0009653	anatomical structure morphogenesis	128/511	2631/16792	2.94013e-08	1.13118e-06	8.64228e-08	ARHGEF26, LRP6, STAT1, HES1, STAT2, RNF213, PARVA, PML, NRCAM, SFRP1, HHIP, ENAH, NKX3-1, CAP2, CUX1, ANK2, FZD7, NGEF, CCL7, COL5A1, SKIL, PLXNC1, COL3A1, MMP8, PDZD8, FLT3LG, IL1A, P2RX7, DLL1, RXFP1, SEMA3F, ID4, COL1A1, WASF3, SEMA6D, CDC42SE2, GAS2, CSF1, PDGFC, TNFSF13B, C10orf90, ADAM12, SPARC, TGFB2, CX3CL1, VDR, VEGFC, GPC6, SIX4, TDRD7, ETV7, PODXL, PSMB10, PSMB9, ALDH1A3, ANOS1, PTN, G…	128
GO:0010646	regulation of cell communication	142/511	3020/16792	3.10312e-08	1.18619e-06	9.06437e-08	ARHGEF26, LRP6, STAT1, HES1, CMAHP, CLIC2, STAT2, BST2, OXTR, RNF213, TNFSF10, PML, SFRP1, HHIP, NKX3-1, RBCK1, CCL5, ANK2, APOL3, FZD7, CCL8, IGFBP3, NGEF, CCL7, LMCD1, F2RL1, SKIL, F2RL2, RMI2, PELI2, ARHGAP20, IL31RA, COL3A1, VNN1, IL1A, JAK2, PMAIP1, P2RX7, A2M, DLL1, PLSCR1, COL1A1, CDC42SE2, APLN, CSF1, PDGFC, ABAT, SOCS1, PDE5A, TNFRSF14, TGFB2, PTPRR, CX3CL1, ARHGEF37, VEGFC, CXCL11, MUC1…	142
GO:0048534	hematopoietic or lymphoid organ development	54/511	778/16792	3.15231e-08	1.19727e-06	9.15086e-08	CASP10, HLA-DOA, HES1, SOX4, UBASH3B, PML, SFRP1, INHBA, BATF2, LGALS9, BATF3, FZD7, RBP1, HLA-B, F2RL1, IL12RB1, IL31RA, ISG15, HLA-G, VNN1, LRRC17, PIR, IL12A, ID2, CEACAM1, FLT3LG, CD74, JAK2, VCAM1, DLL1, KLF4, RUNX2, CSF1, IL15RA, ITK, IL15, WNT5A, MFAP5, TGFB2, CDKN2B, HERC6, SIX4, IRF1, RASSF2, FZD5, IL7, ACVR2A, EGR3, CDK6, TLR3, B2M, AZI2, IRF7, RSAD2	54
GO:0032879	regulation of localization	122/511	2473/16792	3.23949e-08	1.22254e-06	9.34588e-08	HES1, CLIC2, CD274, BST2, OXTR, PML, SFRP1, NKX3-1, CCL5, RBCK1, ANK2, FZD7, CCL8, CCL7, IGFBP3, CTSS, F2RL1, PLXNC1, CADM1, COL3A1, MMP10, AIM2, GSDMD, SLC26A4, IL1A, TSPAN13, SVIP, JAK2, PMAIP1, P2RX7, DLL1, SEMA3F, MX2, COL1A1, SEMA6D, APLN, PDE4B, EDNRB, CSF1, PDGFC, ABAT, SOCS1, TNFRSF14, SPARC, TGFB2, PTPRR, CX3CL1, CXCL5, VEGFC, CXCL11, SIX4, CXCL6, PODXL, HLA-E, DDX58, PTN, GBP1, C2, STXB…	122
GO:1902533	positive regulation of intracellular signal transduction	60/511	915/16792	3.52315e-08	1.32118e-06	1.01019e-07	CASP10, CXCL10, HPSE, HES1, BST2, ZC3HAV1, TNFSF10, ICAM1, NKX3-1, RBCK1, CCL5, LGALS9, RHOC, APOL3, FZD7, DDX60, CCL8, IGFBP3, CCL7, LMCD1, CXCR4, F2RL1, SKIL, F2RL2, SECTM1, PELI2, IL31RA, COL3A1, IL12A, AGO1, IL1A, CASP1, TNFRSF1B, CD74, JAK2, PMAIP1, P2RX7, CSF1, PDGFC, SOCS1, PDE5A, TNFRSF14, IL15, WNT5A, TGFB2, CX3CL1, CXCL11, RASSF2, FZD5, CD40, CD24, GHR, DHX58, CXCL9, HMOX1, TLR3, SEMA5A…	60
GO:0008284	positive regulation of cell proliferation	57/511	849/16792	3.73264e-08	1.39094e-06	1.06373e-07	CXCL10, PTGFR, HPSE, SOX4, HES1, STAT1, CD274, PDCD1LG2, PML, SFRP1, NKX3-1, CCL5, CTHRC1, LGALS9, FZD7, NAMPT, HLA-DMB, HLA-A, IL12RB1, IL31RA, IL12A, ID2, FLT3LG, CD74, JAK2, VCAM1, DLL1, ID4, TMEM119, APLN, EDNRB, RUNX2, CSF1, TNFSF13B, PDGFC, CD47, IL15, WNT5A, TGFB2, CXCL5, VEGFC, HLA-E, HLA-DPA1, CD40, HLA-DPB1, PTN, IL7, CD24, TNC, CD38, BMP6, EGR3, HMOX1, CDK6, SEMA5A, ATF3, CCND2	57
GO:0009966	regulation of signal transduction	131/511	2728/16792	4.0575e-08	1.50254e-06	1.1493e-07	ARHGEF26, LRP6, STAT1, HES1, CMAHP, CLIC2, STAT2, BST2, RNF213, TNFSF10, PML, SFRP1, HHIP, NKX3-1, CCL5, RBCK1, APOL3, FZD7, CCL8, IGFBP3, NGEF, CCL7, LMCD1, F2RL1, SKIL, F2RL2, RMI2, PELI2, ARHGAP20, COL3A1, IL31RA, VNN1, IL1A, JAK2, PMAIP1, A2M, P2RX7, DLL1, PLSCR1, COL1A1, CDC42SE2, CSF1, PDGFC, ABAT, SOCS1, PDE5A, TNFRSF14, TGFB2, PTPRR, CX3CL1, ARHGEF37, VEGFC, CXCL11, MUC1, PSMB10, PSMB9, R…	131
GO:0006935	chemotaxis	43/511	552/16792	4.54314e-08	1.67193e-06	1.27911e-07	PDE4B, ACKR4, EDNRB, CXCL10, CSF1, EXT1, EGR2, PARVA, KIF26B, NRCAM, ENAH, WNT5A, TGFB2, CCL5, LGALS9, TYMP, CXADR, CX3CL1, CAMK1D, CXCL5, CCL8, VEGFC, CXCL11, CCL7, CXCL6, CXCR4, F2RL1, CXCL8, PLXNC1, ANOS1, EPHA5, IL12A, PF4V1, CD74, EGR3, CXCL9, VCAM1, SEMA3F, SEMA5A, SEMA6D, CXCL16, GPNMB, ACKR3	43
GO:0007275	multicellular organism development	205/511	4877/16792	4.84e-08	1.77018e-06	1.35453e-07	STAT1, HES1, PARVA, TNFSF10, SLC7A11, PML, NRCAM, ENAH, HHIP, DRP2, FZD7, NGEF, SKIL, IL31RA, APOL2, VNN1, FLT3LG, JAK2, DHCR7, DLL1, RXFP1, TMEM119, APLN, CSF1, ABAT, DAW1, TNFRSF14, TGFB2, SERINC5, CX3CL1, GPC6, ALDH1A3, ANOS1, PTN, FOXS1, CD24, MTURN, CSRP3, DAAM1, DSP, ADAM23, SDC2, GPR4, LRRN3, CASP10, CXCL10, HLA-DOA, HPSE, RNF114, PRR15, UBASH3B, TSPAN12, WARS, IDO1, ICAM1, INHBA, PCLO, MG…	205
GO:0002688	regulation of leukocyte chemotaxis	17/511	100/16792	5.31202e-08	1.9309e-06	1.47778e-07	CSF1, CXCL10, IL12A, PF4V1, CD74, WNT5A, CCL5, CXCL9, LGALS9, CAMK1D, CXCL5, CXCL11, VEGFC, CXCL6, CCL7, F2RL1, CXCL8	17
GO:0009967	positive regulation of signal transduction	81/511	1428/16792	5.4948e-08	1.98516e-06	1.51958e-07	CASP10, CXCL10, LRP6, HPSE, SOX4, HES1, BST2, ZC3HAV1, TNFSF10, PML, SFRP1, ICAM1, INHBA, NKX3-1, CCL5, RBCK1, LGALS9, RHOC, APOL3, FZD7, CCL8, DDX60, CCL7, IGFBP3, LMCD1, CXCR4, F2RL1, SKIL, F2RL2, SECTM1, PELI2, COL3A1, IL31RA, IL12A, AGO1, IL1A, CASP1, TNFRSF1B, CD74, JAK2, PMAIP1, PSMB8, P2RX7, DLL1, COL1A1, DACT1, CSF1, PDGFC, ABAT, SOCS1, PDE5A, IL15, TNFRSF14, WNT5A, TGFB2, CDKN2B, CX3CL1,…	81
GO:0048523	negative regulation of cellular process	185/511	4300/16792	6.97012e-08	2.5029e-06	1.91624e-07	LRP6, PTGFR, RNF128, STAT1, HES1, CLIC2, CD274, BST2, MX1, RNF213, PDCD1LG2, TNFSF10, PML, SFRP1, HHIP, NKX3-1, CUX1, RBCK1, CCL5, ANK2, FZD7, CCL8, NGEF, IGFBP3, LMCD1, COL5A1, F2RL1, SKIL, FOXG1, IL31RA, COL3A1, ISG15, HLA-G, VNN1, SALL2, ZHX2, FLT3LG, IL1A, SVIP, PMAIP1, JAK2, P2RX7, A2M, DLL1, OAS1, PLSCR1, SEMA3F, CSRNP3, COL1A1, ID4, SEMA6D, LXN, EDNRB, GAS2, ABAT, SOCS1, PDE5A, XAF1, TNFRS…	185
GO:0002250	adaptive immune response	36/511	420/16792	7.06375e-08	2.52125e-06	1.93063e-07	RNF19B, IL18BP, TNFSF13B, TAP2, ERAP1, TAP1, ITK, ICAM1, BTN3A3, MICB, CTSS, HLA-B, HLA-E, HLA-A, IL12RB1, FZD5, CD40, IL31RA, CADM1, HLA-DQB1, BTN3A2, IL12A, BTN3A1, CEACAM1, CD74, JAK2, C2, P2RX7, C1S, C1R, B2M, SERPING1, ERAP2, RSAD2, IRF7, IL27RA	36
GO:0023051	regulation of signaling	142/511	3070/16792	8.35928e-08	2.96579e-06	2.27143e-07	ARHGEF26, LRP6, STAT1, HES1, CMAHP, CLIC2, STAT2, BST2, OXTR, RNF213, TNFSF10, PML, SFRP1, HHIP, NKX3-1, RBCK1, CCL5, ANK2, APOL3, FZD7, CCL8, IGFBP3, NGEF, CCL7, LMCD1, F2RL1, SKIL, F2RL2, RMI2, PELI2, ARHGAP20, IL31RA, COL3A1, VNN1, IL1A, JAK2, PMAIP1, P2RX7, A2M, DLL1, PLSCR1, COL1A1, CDC42SE2, APLN, CSF1, PDGFC, ABAT, SOCS1, PDE5A, TNFRSF14, TGFB2, PTPRR, CX3CL1, ARHGEF37, VEGFC, CXCL11, MUC1…	142
GO:0008285	negative regulation of cell proliferation	47/511	651/16792	9.33386e-08	3.29185e-06	2.52159e-07	IFITM1, RARRES1, STAT1, HES1, SOX4, CD274, PDCD1LG2, WARS, PML, IDO1, PDE5A, SFRP1, IL15, TNFRSF14, WNT5A, SPARC, INHBA, TGFB2, NKX3-1, CDKN2B, LGALS9, VDR, CCL8, VEGFC, IFIT3, IGFBP3, IRF1, FAP, CXCL8, FZD5, PTN, HLA-G, IL12A, ID2, CEACAM1, IL1A, RARRES3, JAK2, PMAIP1, PARP10, DLL1, HMOX1, CDK6, KLF4, GPNMB, PKP2, SFRP4	47
GO:1902105	regulation of leukocyte differentiation	26/511	244/16792	1.16347e-07	4.07901e-06	3.10725e-07	HLA-DOA, CSF1, UBASH3B, IL15RA, IL15, SFRP1, INHBA, LGALS9, RBP1, HLA-B, IRF1, RASSF2, IL12RB1, HLA-G, LRRC17, VNN1, IL7, IL12A, CEACAM1, ID2, FLT3LG, CD74, EGR3, CDK6, TLR3, IRF7	26
GO:0071356	cellular response to tumor necrosis factor	26/511	244/16792	1.16347e-07	4.07901e-06	3.10725e-07	IL18BP, STAT1, TNFSF13B, ADAMTS12, SFRP1, TNFRSF14, ICAM1, NKX3-1, CCL5, CX3CL1, TNFRSF10D, POSTN, CCL8, CCL7, F2RL1, PSMB10, CXCL8, PSMB9, CD40, AIM2, PSME1, TNFRSF1B, PSMB8, JAK2, VCAM1, COL1A1	26
GO:0009306	protein secretion	38/511	469/16792	1.20755e-07	4.20866e-06	3.19107e-07	GJA5, SOX4, CD274, TNFSF13B, ABAT, MYRIP, SOCS1, PML, SFRP1, TNFRSF14, WNT5A, PCLO, TGFB2, VSNL1, CCL5, LGALS9, POSTN, VEGFC, PTPRN2, F2RL1, HLA-E, CD40, CADM1, EPHA5, GBP1, RHBDF2, AIM2, GSDMD, BTN3A2, BTN3A1, CD38, IL1A, CASP1, JAK2, BMP6, GBP5, P2RX7, RSAD2	38
GO:0032501	multicellular organismal process	272/511	7027/16792	1.20851e-07	4.18737e-06	3.19107e-07	PTGFR, STAT1, HES1, CD274, CLIC2, PARVA, TNFSF10, PML, SLC7A11, NRCAM, HHIP, ENAH, DRP2, FZD7, NGEF, IGFBP3, SKIL, IL31RA, APOL2, VNN1, PTGS1, FLT3LG, JAK2, DHCR7, A2M, PLSCR1, DLL1, RXFP1, LXN, TMEM119, APLN, CSF1, GJD3, ABAT, HERC5, DAW1, TNFRSF14, TGFB2, SERINC5, CX3CL1, GPC6, ALDH1A3, ANOS1, COL16A1, PTN, FOXS1, CD24, MTURN, CSRP3, DAAM1, GBP5, DSP, ADAM23, SDC2, GPR4, SERPING1, LRRN3, SLC26A…	272
GO:0019079	viral genome replication	17/511	106/16792	1.23063e-07	4.23921e-06	3.23121e-07	ISG15, IFITM1, BST2, MX1, OASL, ZC3HAV1, APOBEC3G, IFIT1, CCL5, PARP10, OAS1, PLSCR1, C19orf66, ISG20, RSAD2, OAS3, CXCL8	17
GO:0002699	positive regulation of immune effector process	21/511	164/16792	1.30086e-07	4.45525e-06	3.39655e-07	IL12RB1, FZD5, CD40, CADM1, IL12A, ZC3HAV1, DHX58, TNFRSF14, CD74, WNT5A, P2RX7, HMOX1, LGALS9, DDX60, HLA-B, HLA-DMB, B2M, F2RL1, HLA-E, HLA-A, RSAD2	21
GO:0045824	negative regulation of innate immune response	11/511	38/16792	1.34537e-07	4.58121e-06	3.49324e-07	A2M, LGALS9, NMI, CEACAM1, HLA-B, SERPING1, NLRC5, DHX58, HLA-E, HLA-A, TRAFD1	11
GO:0050921	positive regulation of chemotaxis	18/511	121/16792	1.45913e-07	4.94019e-06	3.76769e-07	CSF1, CXCL10, IL12A, PF4V1, CD74, WNT5A, CCL5, CXCL9, LGALS9, CAMK1D, SEMA5A, CXCL5, CXCL11, VEGFC, CXCL6, CCL7, F2RL1, CXCL8	18
GO:0002443	leukocyte mediated immunity	32/511	356/16792	1.52232e-07	5.12484e-06	3.90926e-07	BST2, ICAM1, BTN3A3, LGALS9, MICB, CXCL5, CXCL6, HLA-B, F2RL1, HLA-E, HLA-A, IL12RB1, FZD5, CD40, CADM1, IL31RA, BTN3A2, IL12A, HLA-DQB1, CEACAM1, CD74, C2, P2RX7, C1S, HMOX1, TLR3, C1R, B2M, SERPING1, RSAD2, IRF7, IL27RA	32
GO:0006928	movement of cell or subcellular component	94/511	1795/16792	1.53324e-07	5.13243e-06	3.91577e-07	CXCL10, GJA5, STAT1, HES1, BST2, CD274, PARVA, KIF26B, MYRIP, PML, SLC7A11, NRCAM, SFRP1, ENAH, ICAM1, CCL5, CTHRC1, LGALS9, CXADR, RHOC, ANK2, CCL8, CCL7, IGFBP3, CXCR4, COL5A1, F2RL1, FAP, PLXNC1, CXCL8, COL3A1, MMP10, VNN1, IL12A, BICD1, CYGB, CEACAM1, IL1A, CD74, JAK2, PARP9, VCAM1, SEMA3F, COL1A1, KLF4, SEMA6D, CXCL16, PKP2, DOCK10, SPOCK3, PDE4B, EDNRB, EXT1, CSF1, EGR2, IFITM1, PDGFC, CD47…	94
GO:0030335	positive regulation of cell migration	34/511	395/16792	1.59186e-07	5.29873e-06	4.0434e-07	CXCL10, CSF1, CD274, PDGFC, TNFRSF14, WNT5A, SPARC, ICAM1, TGFB2, CCL5, LGALS9, CAMK1D, CXCL5, POSTN, CXCL11, VEGFC, CCL8, CXCL6, CCL7, PODXL, F2RL1, CXCL8, IL12A, PF4V1, IL1A, CD74, JAK2, CXCL9, SEMA3F, SEMA5A, COL1A1, SEMA6D, CXCL16, GPNMB	34
GO:0001913	T cell mediated cytotoxicity	10/511	30/16792	1.65987e-07	5.49424e-06	4.19335e-07	IL12RB1, P2RX7, CADM1, MICB, IL12A, CEACAM1, HLA-B, B2M, HLA-E, HLA-A	10
GO:0065008	regulation of biological quality	157/511	3548/16792	2.28522e-07	7.48058e-06	5.71143e-07	LRP6, PTGFR, GCH1, PTGER2, RNF128, STAT1, CLIC2, OXTR, PARVA, STEAP4, SLC7A11, PML, NRCAM, SFRP1, GLRB, NKX3-1, CCL5, CXADR, ANK2, CCL8, CCL7, RBP1, F2RL1, SKIL, F2RL2, PLXNC1, APOL1, IL31RA, COL3A1, ISG15, SULT1E1, GSDMD, PTGS1, FLT3LG, IL1A, SLC26A4, JAK2, PMAIP1, P2RX7, A2M, DLL1, OAS1, PLSCR1, SEMA3F, SUGT1, COL1A1, WASF3, SLC12A7, SEMA6D, CDC42SE2, APLN, PDE4B, EDNRB, GAS2, CSF1, PDGFC, TAP2…	157
GO:0050920	regulation of chemotaxis	22/511	186/16792	2.38377e-07	7.76032e-06	5.92606e-07	CSF1, CXCL10, IL12A, PF4V1, CD74, WNT5A, CCL5, CXCL9, LGALS9, CAMK1D, SEMA3F, SEMA5A, CXCL5, CXCL11, VEGFC, CXCL6, CCL7, CXCR4, F2RL1, SEMA6D, PLXNC1, CXCL8	22
GO:0031341	regulation of cell killing	13/511	61/16792	2.43445e-07	7.88201e-06	6.02004e-07	IL12RB1, TGFB2, P2RX7, LGALS9, CADM1, IL12A, CEACAM1, HLA-B, B2M, F2RL1, HLA-E, HLA-A, ICAM1	13
GO:0009887	organ morphogenesis	61/511	992/16792	2.50018e-07	8.05081e-06	6.15002e-07	LRP6, GJA5, STAT1, SOX4, HES1, PARVA, KIF26B, TSPAN12, PML, SFRP1, HHIP, INHBA, NKX3-1, MGP, CTHRC1, INSIG1, HACD1, TMEM100, FZD7, COL5A1, COL3A1, CEACAM1, ID2, PSMB8, P2RX7, FAM20A, DLL1, ID4, COL1A1, DACT1, CSGALNACT1, PKP2, RUNX2, LRIG1, CSF1, BHLHE41, PDGFC, RFLNB, WNT5A, TGFB2, VDR, VEGFC, GPC6, SIX4, TDRD7, ETV7, MMP16, PSMB10, PSMB9, ALDH1A3, FZD5, PTN, CPE, IL7, TNC, PSME1, GHR, BMP6, DAA…	61
GO:0042102	positive regulation of T cell proliferation	16/511	98/16792	2.52863e-07	8.09841e-06	6.18744e-07	HLA-DPA1, IL12RB1, HLA-DPB1, HES1, IL12A, CD274, CD24, TNFSF13B, PDCD1LG2, IL15, VCAM1, CCL5, LGALS9, HLA-DMB, HLA-E, HLA-A	16
GO:1902531	regulation of intracellular signal transduction	90/511	1714/16792	2.78816e-07	8.88161e-06	6.77673e-07	CASP10, ARHGEF26, CXCL10, HPSE, STAT1, HES1, CLIC2, BST2, ZC3HAV1, TNFSF10, PML, SFRP1, ICAM1, INHBA, NKX3-1, CCL5, RBCK1, LGALS9, RHOC, APOL3, TMEM100, FZD7, CCL8, DDX60, CCL7, IGFBP3, NGEF, LMCD1, CXCR4, F2RL1, SKIL, F2RL2, RMI2, SECTM1, ARHGAP20, PELI2, COL3A1, IL31RA, VNN1, IL12A, AGO1, BGN, CEACAM1, IL1A, CASP1, TNFRSF1B, CD74, VRK2, JAK2, PMAIP1, A2M, P2RX7, KLF4, DACT1, CSF1, PDGFC, SOCS1,…	90
GO:1903706	regulation of hemopoiesis	30/511	328/16792	2.79845e-07	8.86672e-06	6.77673e-07	HLA-DOA, CSF1, HES1, UBASH3B, IL15RA, IL15, SFRP1, INHBA, LGALS9, RBP1, HLA-B, IRF1, RASSF2, IL12RB1, ISG15, HLA-G, LRRC17, VNN1, ACVR2A, IL7, IL12A, ID2, CEACAM1, FLT3LG, CD74, EGR3, DLL1, CDK6, TLR3, IRF7	30
GO:0001910	regulation of leukocyte mediated cytotoxicity	12/511	51/16792	2.88798e-07	9.1017e-06	6.95747e-07	IL12RB1, P2RX7, CADM1, LGALS9, IL12A, CEACAM1, HLA-B, F2RL1, B2M, HLA-E, HLA-A, ICAM1	12
GO:2000147	positive regulation of cell motility	34/511	409/16792	3.55535e-07	1.11457e-05	8.52133e-07	CXCL10, CSF1, CD274, PDGFC, TNFRSF14, WNT5A, SPARC, ICAM1, TGFB2, CCL5, LGALS9, CAMK1D, CXCL5, POSTN, CXCL11, VEGFC, CCL8, CXCL6, CCL7, PODXL, F2RL1, CXCL8, IL12A, PF4V1, IL1A, CD74, JAK2, CXCL9, SEMA3F, SEMA5A, COL1A1, SEMA6D, CXCL16, GPNMB	34
GO:0050866	negative regulation of cell activation	20/511	159/16792	3.69199e-07	1.15131e-05	8.80366e-07	IL31RA, HLA-G, CD274, UBASH3B, PDCD1LG2, CYGB, CEACAM1, ID2, ABAT, IDO1, PDE5A, TNFRSF14, CD74, SFRP1, INHBA, HMOX1, LGALS9, IRF1, GPNMB, THBD	20
GO:1903900	regulation of viral life cycle	21/511	177/16792	4.55104e-07	1.41177e-05	1.0797e-06	ISG15, IFITM1, TRIM21, BST2, MX1, ZC3HAV1, OASL, PML, APOBEC3G, IFIT1, TRIM14, CCL5, PARP10, OAS1, LGALS9, PLSCR1, C19orf66, ISG20, RSAD2, OAS3, CXCL8	21
GO:0051094	positive regulation of developmental process	64/511	1089/16792	5.84059e-07	1.80235e-05	1.37864e-06	LRP6, HPSE, HES1, OXTR, PML, IDO1, NRCAM, INHBA, CUX1, LGALS9, TMEM100, IGFBP3, CXCR4, SKIL, CXCL8, IL12RB1, ISG15, HLA-G, VNN1, IL12A, AMIGO2, ID2, CEACAM1, FLT3LG, IL1A, CD74, P2RX7, DLL1, COL1A1, WASF3, TMEM119, PTPRD, RUNX2, CSF1, NEGR1, TNFSF13B, IL15RA, ERAP1, PDE5A, IL15, DPYSL3, WNT5A, TGFB2, CX3CL1, CAMK1D, VDR, VEGFC, SIX4, TENM4, CD40, PTN, FOXS1, IL7, ACVR2A, CD24, GHR, EGR3, BMP6, CS…	64
GO:1903530	regulation of secretion by cell	44/511	630/16792	6.41759e-07	1.97015e-05	1.50723e-06	APLN, GJA5, SOX4, CD274, OXTR, ABAT, MYRIP, SOCS1, PML, SFRP1, TNFRSF14, WNT5A, INHBA, PCLO, NKX3-1, TGFB2, VSNL1, CCL5, LGALS9, POSTN, VEGFC, F2RL1, RAB3B, HLA-E, CD40, CADM1, EPHA5, GBP1, RHBDF2, AIM2, GSDMD, CEACAM1, CD38, IL1A, CASP1, JAK2, BMP6, STXBP6, P2RX7, HMOX1, SYTL2, RAB27B, CADPS2, RSAD2	44
GO:0051272	positive regulation of cellular component movement	34/511	420/16792	6.46065e-07	1.97314e-05	1.50975e-06	CXCL10, CSF1, CD274, PDGFC, TNFRSF14, WNT5A, SPARC, ICAM1, TGFB2, CCL5, LGALS9, CAMK1D, CXCL5, POSTN, CXCL11, VEGFC, CCL8, CXCL6, CCL7, PODXL, F2RL1, CXCL8, IL12A, PF4V1, IL1A, CD74, JAK2, CXCL9, SEMA3F, SEMA5A, COL1A1, SEMA6D, CXCL16, GPNMB	34
GO:0002460	adaptive immune response based on somatic recombination of immune receptors built from immunoglobulin superfamily domains	27/511	286/16792	6.83735e-07	2.07748e-05	1.58983e-06	IL18BP, TNFSF13B, ICAM1, BTN3A3, MICB, HLA-B, HLA-E, HLA-A, IL12RB1, CD40, FZD5, CADM1, IL31RA, BTN3A2, IL12A, HLA-DQB1, CEACAM1, CD74, C2, P2RX7, C1S, C1R, B2M, SERPING1, IRF7, RSAD2, IL27RA	27
GO:0030278	regulation of ossification	21/511	182/16792	7.12619e-07	2.15419e-05	1.64879e-06	RUNX2, CSF1, ISG15, EGR2, IFITM1, ACVR2A, ANKH, RFLNB, ID2, SFRP1, SOST, WNT5A, BMP6, TGFB2, P2RX7, MGP, CTHRC1, CDK6, ID4, TMEM119, RASSF2	21
GO:0040017	positive regulation of locomotion	34/511	422/16792	7.22123e-07	2.17184e-05	1.66255e-06	CXCL10, CSF1, CD274, PDGFC, TNFRSF14, WNT5A, SPARC, ICAM1, TGFB2, CCL5, LGALS9, CAMK1D, CXCL5, POSTN, CXCL11, VEGFC, CCL8, CXCL6, CCL7, PODXL, F2RL1, CXCL8, IL12A, PF4V1, IL1A, CD74, JAK2, CXCL9, SEMA3F, SEMA5A, COL1A1, SEMA6D, CXCL16, GPNMB	34
GO:0048585	negative regulation of response to stimulus	75/511	1369/16792	7.51521e-07	2.24884e-05	1.72175e-06	IL18BP, LRP6, STAT1, CLIC2, BST2, UBASH3B, RNF213, TNFSF10, SFRP1, HHIP, ICAM1, IFIT1, NKX3-1, CCL5, CTHRC1, LGALS9, IGFBP3, HLA-B, F2RL1, SKIL, HLA-A, CXCL8, COL3A1, HLA-G, VNN1, BICD1, BGN, CEACAM1, IL1A, TNFRSF1B, CD74, SOST, SVIP, TRAFD1, PSMB8, A2M, P2RX7, SEMA3F, NMI, KLF4, DACT1, SEMA6D, RUNX2, ABAT, SOCS1, ADAMTS12, WNT5A, TGFB2, PTPRR, CX3CL1, MICB, MUC1, HLA-E, PSMB10, RASSF2, PSMB9, PM…	75
GO:0002831	regulation of response to biotic stimulus	18/511	136/16792	8.00747e-07	2.38411e-05	1.82558e-06	IL12RB1, AIM2, IL12A, CEACAM1, HERC5, ZC3HAV1, PML, DHX58, IL15, APOBEC3G, BMP6, IFIT1, MICB, DDX60, F2RL1, B2M, DDX58, HLA-A	18
GO:0051046	regulation of secretion	46/511	683/16792	9.24185e-07	2.73786e-05	2.09677e-06	APLN, EDNRB, GJA5, SOX4, CD274, OXTR, ABAT, MYRIP, SOCS1, PML, SFRP1, TNFRSF14, WNT5A, INHBA, PCLO, NKX3-1, TGFB2, VSNL1, CCL5, LGALS9, POSTN, VEGFC, F2RL1, RAB3B, HLA-E, CD40, CADM1, EPHA5, GBP1, RHBDF2, AIM2, GSDMD, CEACAM1, IL1A, CD38, CASP1, CD74, JAK2, BMP6, STXBP6, P2RX7, HMOX1, SYTL2, RAB27B, CADPS2, RSAD2	46
GO:0007162	negative regulation of cell adhesion	23/511	219/16792	9.41123e-07	2.77417e-05	2.12488e-06	HLA-G, GBP1, CD274, UBASH3B, PDCD1LG2, TNC, CEACAM1, ABAT, IDO1, PDE5A, TNFRSF14, CD74, JAK2, LGALS9, SEMA5A, POSTN, FZD7, MUC1, COL1A1, KLF4, IRF1, PODXL, GPNMB	23
GO:0050777	negative regulation of immune response	17/511	123/16792	9.82344e-07	2.88134e-05	2.20729e-06	COL3A1, HLA-G, BST2, CEACAM1, DHX58, TRAFD1, TGFB2, A2M, HMOX1, LGALS9, NMI, HLA-B, NLRC5, SERPING1, HLA-E, HLA-A, IL27RA	17
GO:0070098	chemokine-mediated signaling pathway	14/511	82/16792	1.05619e-06	3.08268e-05	2.36187e-06	ACKR4, CXCL10, PF4V1, CCL5, CXCL9, CX3CL1, CXCL5, CXCL11, CCL8, CCL7, CXCL6, CXCR4, ACKR3, CXCL8	14
GO:0050708	regulation of protein secretion	32/511	392/16792	1.23681e-06	3.59214e-05	2.7526e-06	GJA5, SOX4, CD274, ABAT, MYRIP, SOCS1, PML, SFRP1, TNFRSF14, WNT5A, TGFB2, VSNL1, CCL5, LGALS9, POSTN, VEGFC, F2RL1, HLA-E, CD40, CADM1, EPHA5, GBP1, AIM2, RHBDF2, GSDMD, CD38, IL1A, CASP1, JAK2, BMP6, P2RX7, RSAD2	32
GO:0032649	regulation of interferon-gamma production	15/511	97/16792	1.31913e-06	3.81253e-05	2.91125e-06	PDE4B, HLA-DPA1, IL12RB1, FZD5, HLA-DPB1, ISG15, IL12A, CD274, PDCD1LG2, WNT5A, INHBA, LGALS9, TLR3, HLA-A, IL27RA	15
GO:1901700	response to oxygen-containing compound	78/511	1466/16792	1.32055e-06	3.79812e-05	2.91125e-06	IL18BP, CXCL10, PTGFR, LRP6, GCH1, PTGER2, STAT1, SOX4, OXTR, SLC2A5, TNFSF10, IDO1, SFRP1, ICAM1, INHBA, GLRB, NKX3-1, VSNL1, CCL5, LGALS9, FZD7, CCL7, NAMPT, CXCL8, COL3A1, IL12A, CASP4, CEACAM1, CASP1, TNFRSF1B, JAK2, VCAM1, P2RX7, COL1A1, KLF4, CXCL16, PDE4B, EDNRB, GJD3, EGR2, PDGFC, FBXO32, ABAT, SOCS1, IL15, TNFRSF14, WNT5A, SPARC, TGFB2, MICB, TNFRSF10D, CXCL5, VDR, POSTN, CXCL11, MUC1, C…	78
GO:0002718	regulation of cytokine production involved in immune response	12/511	59/16792	1.36258e-06	3.90006e-05	2.98979e-06	TGFB2, FZD5, HMOX1, TLR3, BST2, F2RL1, B2M, TNFRSF14, CD74, HLA-A, WNT5A, RSAD2	12
GO:0051047	positive regulation of secretion	30/511	355/16792	1.42985e-06	4.07292e-05	3.12274e-06	APLN, EDNRB, SOX4, CD274, OXTR, ABAT, MYRIP, TNFRSF14, WNT5A, INHBA, NKX3-1, TGFB2, VSNL1, LGALS9, POSTN, VEGFC, F2RL1, HLA-E, CADM1, AIM2, GSDMD, CD38, IL1A, CASP1, BMP6, JAK2, P2RX7, SYTL2, RAB27B, CADPS2	30
GO:0097191	extrinsic apoptotic signaling pathway	23/511	225/16792	1.48089e-06	4.19812e-05	3.21916e-06	CASP10, BCL2A1, IL7, IL12A, TNFSF10, PML, IL1A, TNFRSF1B, SFRP1, ICAM1, INHBA, JAK2, PMAIP1, TGFB2, P2RX7, RBCK1, HMOX1, CX3CL1, TNFRSF10D, TLR3, ATF3, IFI6, SKIL	23
GO:0042981	regulation of apoptotic process	75/511	1400/16792	1.71626e-06	4.8422e-05	3.70932e-06	CASP10, LRP6, PTGFR, STAT1, SOX4, CD274, CARD16, TNFSF10, IDO1, PML, SFRP1, ICAM1, INHBA, NKX3-1, CCL5, RBCK1, LGALS9, IFIT2, ZMAT3, IGFBP3, IFIT3, NGEF, SKIL, FAP, IL31RA, VNN1, IL12A, AMIGO2, CASP4, FLT3LG, IL1A, CASP1, TNFRSF1B, CD74, JAK2, PMAIP1, P2RX7, DLL1, CSRNP3, KLF4, EDNRB, TNFRSF14, WNT5A, TGFB2, CAMK1D, CX3CL1, TNFRSF10D, VDR, SIX4, MUC1, RASSF2, ALDH1A3, CD40, BCL2A1, PTN, ACSL5, IL…	75
GO:0001944	vasculature development	42/511	610/16792	1.72225e-06	4.83605e-05	3.70932e-06	CXCL10, HPSE, GJA5, STAT1, HES1, SOX4, RNF213, PARVA, TSPAN12, WARS, PML, ERAP1, TNFAIP2, NRCAM, SFRP1, SPARC, WNT5A, NKX3-1, TGFB2, TYMP, CX3CL1, TMEM100, VEGFC, COL5A1, FAP, CXCL8, FZD5, COL3A1, PTN, FOXS1, CEACAM1, IL1A, EGR3, DHCR7, DLL1, HMOX1, SEMA5A, GPR4, COL1A1, KLF4, GPNMB, ACKR3	42
GO:0001503	ossification	30/511	359/16792	1.78834e-06	4.99796e-05	3.8184e-06	RUNX2, EXT1, IFITM1, ANKH, RFLNB, SFRP1, SPARC, WNT5A, TGFB2, MGP, CTHRC1, IGFBP3, MMP16, RASSF2, ISG15, PTN, LRRC17, ACVR2A, TNC, ID2, SOST, BMP6, P2RX7, CDK6, COL1A1, ID4, CSGALNACT1, GPNMB, TMEM119, SLC26A2	30
GO:0002367	cytokine production involved in immune response	13/511	73/16792	1.84543e-06	5.10929e-05	3.92043e-06	FZD5, IL31RA, BST2, CD74, TNFRSF14, WNT5A, TGFB2, HMOX1, TLR3, F2RL1, B2M, HLA-A, RSAD2	13
GO:0050688	regulation of defense response to virus	14/511	87/16792	2.10964e-06	5.81361e-05	4.44522e-06	IL12RB1, AIM2, HERC5, ZC3HAV1, DHX58, PML, IL15, APOBEC3G, IFIT1, MICB, DDX60, B2M, DDX58, HLA-A	14
GO:0031349	positive regulation of defense response	32/511	402/16792	2.11148e-06	5.79175e-05	4.44522e-06	IFIH1, ZC3HAV1, CD47, IDO1, IL15, WNT5A, CCL5, LGALS9, CX3CL1, DDX60, CCL8, CCL7, CTSS, IRF1, F2RL1, HLA-E, PSMB10, DDX58, PSMB9, CADM1, AIM2, IL12A, PSME1, DHX58, JAK2, PSMB8, GBP5, PLSCR1, TLR3, NLRC5, RSAD2, IRF7	32
GO:0002449	lymphocyte mediated immunity	26/511	285/16792	2.15022e-06	5.87084e-05	4.50649e-06	BTN3A3, ICAM1, LGALS9, MICB, HLA-B, HLA-E, HLA-A, IL12RB1, CD40, FZD5, CADM1, IL31RA, BTN3A2, IL12A, HLA-DQB1, CEACAM1, CD74, C2, P2RX7, C1S, C1R, B2M, SERPING1, RSAD2, IRF7, IL27RA	26
GO:0043065	positive regulation of apoptotic process	40/511	572/16792	2.23654e-06	6.07849e-05	4.66646e-06	SOX4, TNFSF10, IDO1, PML, SFRP1, WNT5A, ICAM1, INHBA, TGFB2, NKX3-1, RBCK1, CCL5, LGALS9, IFIT2, CAMK1D, VDR, ZMAT3, NGEF, IGFBP3, SKIL, FAP, RASSF2, ALDH1A3, CD40, BCL2A1, PTN, IL12A, JMY, CASP1, JAK2, PMAIP1, P2RX7, CYCS, HMOX1, TLR3, IFI27, ATF3, CSRNP3, FGD4, SFRP4	40
GO:0043067	regulation of programmed cell death	75/511	1413/16792	2.37773e-06	6.4327e-05	4.939e-06	CASP10, LRP6, PTGFR, STAT1, SOX4, CD274, CARD16, TNFSF10, IDO1, PML, SFRP1, ICAM1, INHBA, NKX3-1, CCL5, RBCK1, LGALS9, IFIT2, ZMAT3, IGFBP3, IFIT3, NGEF, SKIL, FAP, IL31RA, VNN1, IL12A, AMIGO2, CASP4, FLT3LG, IL1A, CASP1, TNFRSF1B, CD74, JAK2, PMAIP1, P2RX7, DLL1, CSRNP3, KLF4, EDNRB, TNFRSF14, WNT5A, TGFB2, CAMK1D, CX3CL1, TNFRSF10D, VDR, SIX4, MUC1, RASSF2, ALDH1A3, CD40, BCL2A1, PTN, ACSL5, IL…	75
GO:0050714	positive regulation of protein secretion	22/511	214/16792	2.41653e-06	6.50796e-05	4.99739e-06	CADM1, AIM2, GSDMD, SOX4, CD274, ABAT, MYRIP, CD38, IL1A, CASP1, TNFRSF14, WNT5A, BMP6, JAK2, TGFB2, P2RX7, VSNL1, LGALS9, POSTN, VEGFC, F2RL1, HLA-E	22
GO:0032940	secretion by cell	57/511	966/16792	2.45761e-06	6.58864e-05	5.05996e-06	VAMP5, GJA5, SOX4, CD274, OXTR, MYRIP, PML, TNFAIP2, SFRP1, GLS, PCLO, INHBA, NKX3-1, VSNL1, CCL5, LGALS9, CCL8, F2RL1, PRSS12, CADM1, RHBDF2, AIM2, GSDMD, CEACAM1, IL1A, CASP1, JAK2, A2M, P2RX7, RAB27B, APLN, TNFSF13B, ABAT, SOCS1, TNFRSF14, SPARC, WNT5A, TGFB2, POSTN, VEGFC, PTPRN2, RAB3B, HLA-E, CD40, EPHA5, GBP1, BTN3A2, BTN3A1, CD38, BMP6, GBP5, STXBP6, HMOX1, SYTL2, SERPING1, CADPS2, RSAD2	57
GO:0001568	blood vessel development	40/511	576/16792	2.63181e-06	7.02385e-05	5.39484e-06	CXCL10, HPSE, GJA5, STAT1, HES1, SOX4, RNF213, PARVA, TSPAN12, WARS, ERAP1, PML, TNFAIP2, NRCAM, SPARC, WNT5A, NKX3-1, TGFB2, TYMP, CX3CL1, TMEM100, VEGFC, COL5A1, FAP, CXCL8, FZD5, COL3A1, PTN, FOXS1, CEACAM1, IL1A, EGR3, DHCR7, DLL1, HMOX1, SEMA5A, GPR4, COL1A1, KLF4, ACKR3	40
GO:1903532	positive regulation of secretion by cell	28/511	327/16792	2.70264e-06	7.18053e-05	5.51584e-06	APLN, SOX4, CD274, OXTR, ABAT, MYRIP, TNFRSF14, WNT5A, INHBA, NKX3-1, TGFB2, VSNL1, LGALS9, POSTN, VEGFC, F2RL1, HLA-E, CADM1, AIM2, GSDMD, CD38, IL1A, CASP1, BMP6, JAK2, P2RX7, RAB27B, CADPS2	28
GO:0043068	positive regulation of programmed cell death	40/511	577/16792	2.73764e-06	7.24104e-05	5.56298e-06	SOX4, TNFSF10, IDO1, PML, SFRP1, WNT5A, ICAM1, INHBA, TGFB2, NKX3-1, RBCK1, CCL5, LGALS9, IFIT2, CAMK1D, VDR, ZMAT3, NGEF, IGFBP3, SKIL, FAP, RASSF2, ALDH1A3, CD40, BCL2A1, PTN, IL12A, JMY, CASP1, JAK2, PMAIP1, P2RX7, CYCS, HMOX1, TLR3, IFI27, ATF3, CSRNP3, FGD4, SFRP4	40
GO:0001525	angiogenesis	32/511	413/16792	3.67124e-06	9.66716e-05	7.42781e-06	CXCL10, HPSE, GJA5, STAT1, RNF213, PARVA, TSPAN12, WARS, ERAP1, PML, TNFAIP2, NRCAM, SPARC, WNT5A, TGFB2, TYMP, CX3CL1, TMEM100, VEGFC, FAP, CXCL8, FZD5, PTN, CEACAM1, IL1A, EGR3, DLL1, HMOX1, SEMA5A, GPR4, KLF4, ACKR3	32
GO:0042060	wound healing	38/511	542/16792	4.00705e-06	0.000105047	8.07229e-06	IRF2, HPSE, PDGFC, UBASH3B, ABAT, SLC7A11, DGKG, SPARC, WNT5A, TGFB2, CX3CL1, RHOC, FZD7, POSTN, IRF1, COL5A1, F2RL1, F2RL2, FAP, TMEFF2, CD40, COL3A1, TNC, CEACAM1, DOCK9, IL1A, PF4V1, JAK2, SERPINB2, P2RX7, A2M, PLSCR1, HMOX1, DSP, GPR4, COL1A1, SERPING1, THBD	38
GO:0002700	regulation of production of molecular mediator of immune response	15/511	107/16792	4.34662e-06	0.000113446	8.71877e-06	CD40, FZD5, BST2, CD74, TNFRSF14, WNT5A, TGFB2, HMOX1, TLR3, F2RL1, B2M, HLA-E, HLA-A, RSAD2, IL27RA	15
GO:0045597	positive regulation of cell differentiation	51/511	841/16792	4.38571e-06	0.000113965	8.75958e-06	RUNX2, CSF1, IFITM1, HES1, NEGR1, IL15RA, PDE5A, NRCAM, IL15, SFRP1, DPYSL3, WNT5A, INHBA, TGFB2, CUX1, LGALS9, CTHRC1, CAMK1D, TMEM100, VDR, VEGFC, IGFBP3, CXCR4, SKIL, TENM4, IL12RB1, PTN, ISG15, SULT1E1, HLA-G, VNN1, IL12A, ACVR2A, IL7, CD24, CEACAM1, ID2, GHR, FLT3LG, CD74, JAK2, EGR3, BMP6, CSRP3, CXCL9, SEMA5A, ID4, COL1A1, TMEM119, SFRP4, PTPRD	51
GO:0060429	epithelium development	60/511	1060/16792	4.55873e-06	0.000117943	9.06641e-06	ARHGEF26, LRP6, HPSE, GJA5, STAT1, SOX4, HES1, KIF26B, PML, SLC7A11, SFRP1, HHIP, ICAM1, INHBA, NKX3-1, CTHRC1, NUMA1, RHOC, TMEM100, FZD7, COL5A1, F2RL1, SKIL, IL31RA, SALL2, ID2, CEACAM1, JAK2, PSMB8, DLL1, ID4, KLF4, DACT1, CSF1, GSTK1, WNT5A, TGFB2, VDR, VEGFC, GPC6, SIX4, TDRD7, MUC1, PODXL, PSMB10, PSMB9, TMEFF2, ALDH1A3, FZD5, PTN, CD24, TNC, PSME1, BMP6, DAAM1, CDK6, DSP, GPR4, ROR1, SFRP4	60
GO:0002703	regulation of leukocyte mediated immunity	18/511	156/16792	5.41866e-06	0.00013958	1.0731e-05	IL12RB1, FZD5, CD40, CADM1, IL12A, BST2, CEACAM1, P2RX7, HMOX1, LGALS9, TLR3, HLA-B, F2RL1, B2M, HLA-E, HLA-A, RSAD2, IL27RA	18
GO:0051050	positive regulation of transport	54/511	920/16792	5.50307e-06	0.000141141	1.08522e-05	CXCL10, SOX4, HES1, CD274, OXTR, MYRIP, INHBA, NKX3-1, VSNL1, RBCK1, CCL5, LGALS9, ANK2, CTSS, F2RL1, CADM1, AIM2, GSDMD, BICD1, IL1A, CASP1, PMAIP1, JAK2, P2RX7, DLL1, RAB27B, DACT1, PKP2, APLN, EDNRB, ABAT, CD47, TNFRSF14, WNT5A, TGFB2, CAMK1D, POSTN, CXCL11, VEGFC, RAB3B, HLA-E, DDX58, FZD5, CD38, BMP6, C2, CXCL9, RHOQ, TLR3, SYTL2, SEMA5A, B2M, CADPS2, SFRP4	54
GO:0072359	circulatory system development	55/511	945/16792	5.72079e-06	0.000146092	1.11871e-05	CXCL10, LRP6, HPSE, GJA5, STAT1, SOX4, HES1, PARVA, OXTR, RNF213, TSPAN12, WARS, PML, TNFAIP2, NRCAM, SFRP1, NKX3-1, CXADR, ANK2, TMEM100, COL5A1, FAP, CXCL8, COL3A1, ID2, CEACAM1, IL1A, DHCR7, DLL1, COL1A1, KLF4, PKP2, XIRP1, ERAP1, DAW1, SPARC, WNT5A, TGFB2, TYMP, CX3CL1, VEGFC, TENM4, FZD5, PTN, FOXS1, CPE, CSRP3, EGR3, HMOX1, DSP, SEMA5A, GPR4, GPNMB, ACKR3, SORBS2	55
GO:0072358	cardiovascular system development	55/511	945/16792	5.72079e-06	0.000146092	1.11871e-05	CXCL10, LRP6, HPSE, GJA5, STAT1, SOX4, HES1, PARVA, OXTR, RNF213, TSPAN12, WARS, PML, TNFAIP2, NRCAM, SFRP1, NKX3-1, CXADR, ANK2, TMEM100, COL5A1, FAP, CXCL8, COL3A1, ID2, CEACAM1, IL1A, DHCR7, DLL1, COL1A1, KLF4, PKP2, XIRP1, ERAP1, DAW1, SPARC, WNT5A, TGFB2, TYMP, CX3CL1, VEGFC, TENM4, FZD5, PTN, FOXS1, CPE, CSRP3, EGR3, HMOX1, DSP, SEMA5A, GPR4, GPNMB, ACKR3, SORBS2	55
GO:0048729	tissue morphogenesis	41/511	622/16792	6.74706e-06	0.000171558	1.3139e-05	CSF1, LRP6, STAT1, HES1, SOX4, KIF26B, PML, SFRP1, HHIP, WNT5A, INHBA, TGFB2, NKX3-1, CTHRC1, RHOC, TMEM100, FZD7, VDR, VEGFC, GPC6, SIX4, COL5A1, PODXL, PSMB10, TMEFF2, PSMB9, ALDH1A3, FZD5, COL3A1, TNC, CEACAM1, PSME1, PSMB8, DAAM1, DLL1, DSP, ROR1, ID4, KLF4, DACT1, PKP2	41
GO:0046903	secretion	61/511	1098/16792	6.7995e-06	0.000172153	1.31862e-05	VAMP5, GJA5, SOX4, CD274, OXTR, MYRIP, PML, TNFAIP2, SFRP1, GLS, PCLO, INHBA, NKX3-1, VSNL1, CCL5, LGALS9, CCL8, F2RL1, PRSS12, CADM1, RHBDF2, AIM2, GSDMD, CEACAM1, IL1A, CASP1, CD74, JAK2, A2M, P2RX7, RAB27B, APLN, EDNRB, TNFSF13B, ABAT, SOCS1, TNFRSF14, SPARC, WNT5A, TGFB2, VDR, POSTN, VEGFC, PTPRN2, RAB3B, HLA-E, CD40, EPHA5, GBP1, BTN3A2, BTN3A1, CD38, BMP6, GBP5, STXBP6, HMOX1, SYTL2, PLA2G1…	61
GO:0048514	blood vessel morphogenesis	35/511	491/16792	7.26e-06	0.000183029	1.4021e-05	CXCL10, HPSE, GJA5, SOX4, HES1, STAT1, RNF213, PARVA, TSPAN12, WARS, ERAP1, PML, TNFAIP2, NRCAM, SPARC, WNT5A, TGFB2, TYMP, CX3CL1, TMEM100, VEGFC, FAP, CXCL8, FZD5, COL3A1, PTN, CEACAM1, IL1A, EGR3, DLL1, HMOX1, SEMA5A, GPR4, KLF4, ACKR3	35
GO:0010941	regulation of cell death	77/511	1509/16792	7.30973e-06	0.000183501	1.4059e-05	CASP10, LRP6, PTGFR, STAT1, SOX4, CD274, CARD16, TNFSF10, IDO1, PML, SFRP1, ICAM1, INHBA, NKX3-1, CCL5, RBCK1, LGALS9, IFIT2, ZMAT3, IGFBP3, IFIT3, NGEF, SKIL, FAP, IL31RA, VNN1, IL12A, AMIGO2, CASP4, FLT3LG, IL1A, CASP1, TNFRSF1B, CD74, JAK2, PMAIP1, P2RX7, DLL1, CSRNP3, KLF4, EDNRB, TNFRSF14, WNT5A, TGFB2, CAMK1D, CX3CL1, TNFRSF10D, VDR, SIX4, MUC1, RASSF2, ALDH1A3, CD40, BCL2A1, PTN, ACSL5, IL…	77
GO:0001906	cell killing	15/511	112/16792	7.47495e-06	0.000186857	1.43178e-05	IL12RB1, TGFB2, APOL1, P2RX7, LGALS9, CADM1, MICB, IL12A, CEACAM1, HLA-B, B2M, F2RL1, HLA-E, HLA-A, ICAM1	15
GO:0097190	apoptotic signaling pathway	39/511	583/16792	8.55194e-06	0.000212879	1.63139e-05	CASP10, TNFSF10, PML, SFRP1, TNFRSF14, ICAM1, INHBA, NKX3-1, TGFB2, RBCK1, LGALS9, CX3CL1, TNFRSF10D, ZMAT3, MUC1, SKIL, CD40, BCL2A1, VNN1, ACSL5, IL12A, IL7, CD24, CASP4, CD38, IL1A, TNFRSF1B, CD74, PMAIP1, JAK2, P2RX7, DEPTOR, HMOX1, CYCS, TLR3, ATF3, IFI27, IFI6, ACKR3	39
GO:0010942	positive regulation of cell death	40/511	607/16792	9.03033e-06	0.000223845	1.71565e-05	SOX4, TNFSF10, IDO1, PML, SFRP1, WNT5A, ICAM1, INHBA, TGFB2, NKX3-1, RBCK1, CCL5, LGALS9, IFIT2, CAMK1D, VDR, ZMAT3, NGEF, IGFBP3, SKIL, FAP, RASSF2, ALDH1A3, CD40, BCL2A1, PTN, IL12A, JMY, CASP1, JAK2, PMAIP1, P2RX7, CYCS, HMOX1, TLR3, IFI27, ATF3, CSRNP3, FGD4, SFRP4	40
GO:2000027	regulation of organ morphogenesis	23/511	252/16792	9.4256e-06	0.000232668	1.78349e-05	FZD5, RUNX2, CSF1, PTN, HES1, STAT1, CEACAM1, PSME1, PML, SFRP1, WNT5A, PSMB8, DAAM1, TGFB2, CTHRC1, FZD7, VDR, GPC6, SIX4, ROR1, DACT1, PSMB10, PSMB9	23
GO:0030098	lymphocyte differentiation	26/511	310/16792	9.51067e-06	0.000233794	1.79233e-05	RUNX2, HLA-DOA, SOX4, IL15RA, ITK, IL15, SFRP1, INHBA, LGALS9, FZD7, IRF1, IL12RB1, FZD5, HLA-G, VNN1, IL7, IL12A, ID2, FLT3LG, CD74, EGR3, VCAM1, DLL1, CDK6, B2M, RSAD2	26
GO:0002009	morphogenesis of an epithelium	36/511	521/16792	1.03868e-05	0.000254274	1.94857e-05	CSF1, LRP6, STAT1, HES1, SOX4, KIF26B, PML, SFRP1, HHIP, WNT5A, TGFB2, NKX3-1, CTHRC1, RHOC, FZD7, VDR, VEGFC, GPC6, SIX4, COL5A1, PODXL, PSMB10, TMEFF2, PSMB9, ALDH1A3, FZD5, TNC, CEACAM1, PSME1, PSMB8, DAAM1, DLL1, ROR1, ID4, KLF4, DACT1	36
GO:0045089	positive regulation of innate immune response	25/511	292/16792	1.04231e-05	0.000254112	1.94857e-05	IFIH1, CADM1, AIM2, IL12A, PSME1, ZC3HAV1, DHX58, WNT5A, PSMB8, GBP5, CCL5, PLSCR1, LGALS9, TLR3, DDX60, CTSS, IRF1, F2RL1, NLRC5, HLA-E, IRF7, DDX58, PSMB10, RSAD2, PSMB9	25
GO:0051049	regulation of transport	87/511	1796/16792	1.19218e-05	0.000288272	2.21105e-05	CXCL10, GJA5, SOX4, HES1, CLIC2, BST2, CD274, UBASH3B, OXTR, MYRIP, PML, SFRP1, ICAM1, PCLO, INHBA, NKX3-1, VSNL1, CCL5, RBCK1, LGALS9, INSIG1, ANK2, FZD7, CTSS, F2RL1, CADM1, TBC1D1, AIM2, RHBDF2, GSDMD, BICD1, CEACAM1, IL1A, CASP1, CD74, TSPAN13, SVIP, JAK2, PMAIP1, P2RX7, DLL1, MX2, RAB27B, DACT1, PKP2, PDE4B, APLN, EDNRB, ABAT, CD47, SOCS1, TNFRSF14, WNT5A, TGFB2, CAMK1D, POSTN, VEGFC, CXCL11…	87
GO:0048869	cellular developmental process	164/511	3992/16792	1.21133e-05	0.000291712	2.23769e-05	ARHGEF26, VAMP5, LRP6, STAT1, HES1, PARVA, STEAP4, SLC7A11, PML, NRCAM, SFRP1, HHIP, ENAH, CUX1, CAP2, CXADR, NUMA1, ANK2, FZD7, NGEF, IGFBP3, CCL7, RBP1, COL5A1, F2RL1, SKIL, PLXNC1, CADM1, IL31RA, COL3A1, ISG15, SULT1E1, HLA-G, VNN1, MMP8, ZHX2, PIR, FLT3LG, IL1A, JAK2, DHCR7, P2RX7, VCAM1, A2M, DLL1, SEMA3F, RXFP1, COL1A1, ID4, WASF3, SEMA6D, TMEM119, CDC42SE2, EDNRB, GAS2, CSF1, SOCS1, ADAM12…	164
GO:0060759	regulation of response to cytokine stimulus	17/511	149/16792	1.23029e-05	0.000295079	2.26378e-05	CSF1, STAT1, CD24, STAT2, SOCS1, CD74, WNT5A, VRK2, JAK2, PARP9, RBCK1, CCL5, KLF4, F2RL1, NLRC5, IRF7, USP18	17
GO:0022408	negative regulation of cell-cell adhesion	16/511	133/16792	1.26843e-05	0.000302999	2.3248e-05	HLA-G, CD274, UBASH3B, PDCD1LG2, CEACAM1, ABAT, IDO1, PDE5A, TNFRSF14, CD74, JAK2, LGALS9, KLF4, IRF1, PODXL, GPNMB	16
GO:0045596	negative regulation of cell differentiation	41/511	640/16792	1.33877e-05	0.000318514	2.44414e-05	EDNRB, CXCL10, STAT1, HES1, BHLHE41, UBASH3B, RFLNB, IL15RA, ADAMTS12, SFRP1, DPYSL3, WNT5A, INHBA, TGFB2, INSIG1, POSTN, FZD7, NGEF, SIX4, IRF1, COL5A1, SKIL, COL3A1, PTN, HLA-G, GBP1, LRRC17, ZHX2, ID2, CEACAM1, CD74, CSRP3, DLL1, CDK6, SEMA3F, TLR3, SEMA5A, ID4, SEMA6D, B2M, PKP2	41
GO:0002440	production of molecular mediator of immune response	18/511	167/16792	1.35e-05	0.0003199	2.45504e-05	FZD5, CD40, IL31RA, HLA-DQB1, BST2, TNFSF13B, TNFRSF14, CD74, WNT5A, TGFB2, HMOX1, TLR3, F2RL1, B2M, HLA-E, HLA-A, RSAD2, IL27RA	18
GO:0002253	activation of immune response	37/511	550/16792	1.37404e-05	0.0003243	2.48909e-05	PDE4B, IFIH1, ZC3HAV1, ITK, RBCK1, THEMIS2, LGALS9, MICB, DDX60, CTSS, IRF1, F2RL1, PSMB10, CFB, DDX58, PSMB9, HLA-DPA1, HLA-DPB1, HLA-DQA1, GBP1, AIM2, HLA-DQB1, BTN3A1, CEACAM1, PSME1, DHX58, CD38, PSMB8, C2, A2M, C1S, TLR3, C1R, SERPING1, RSAD2, IRF7, HLA-DRA	37
GO:0045765	regulation of angiogenesis	21/511	222/16792	1.50828e-05	0.000354566	2.72172e-05	CXCL10, PTN, STAT1, CEACAM1, TSPAN12, PML, WARS, IL1A, ERAP1, SFRP1, WNT5A, SPARC, HMOX1, DLL1, CX3CL1, SEMA5A, VEGFC, GPR4, KLF4, GPNMB, CXCL8	21
GO:0002824	positive regulation of adaptive immune response based on somatic recombination of immune receptors built from immunoglobulin superfamily domains	12/511	75/16792	1.53878e-05	0.000360304	2.76606e-05	IL12RB1, P2RX7, FZD5, CD40, IL12A, TNFSF13B, HLA-B, B2M, HLA-E, HLA-A, RSAD2, IL27RA	12
GO:0002479	antigen processing and presentation of exogenous peptide antigen via MHC class I, TAP-dependent	11/511	63/16792	1.84094e-05	0.000429343	3.29654e-05	HLA-G, HLA-C, HLA-B, B2M, PSME1, HLA-F, HLA-E, HLA-A, PSMB10, PSMB9, PSMB8	11
GO:1901342	regulation of vasculature development	22/511	245/16792	1.97587e-05	0.000458999	3.52466e-05	CXCL10, PTN, STAT1, CEACAM1, TSPAN12, PML, WARS, IL1A, ERAP1, SFRP1, WNT5A, SPARC, HMOX1, DLL1, CX3CL1, TMEM100, SEMA5A, VEGFC, GPR4, KLF4, GPNMB, CXCL8	22
GO:0035567	non-canonical Wnt signaling pathway	17/511	155/16792	2.02448e-05	0.000468451	3.59763e-05	FZD5, MOV10, AGO1, RNF213, PSME1, SFRP1, WNT5A, PSMB8, DAAM1, CTHRC1, FZD7, GPC6, ROR1, DACT1, SFRP4, PSMB10, PSMB9	17
GO:0012501	programmed cell death	88/511	1852/16792	2.1654e-05	0.000499102	3.83348e-05	CASP10, PTGFR, LRP6, STAT1, SOX4, CD274, MX1, CARD16, TNFSF10, IDO1, PML, SFRP1, ICAM1, INHBA, NKX3-1, CCL5, RBCK1, LGALS9, IFIT2, ZMAT3, IGFBP3, IFIT3, NGEF, CXCR4, SKIL, FAP, CADM1, IL31RA, AIM2, VNN1, IL12A, AMIGO2, GSDMD, CASP4, FLT3LG, IL1A, CASP1, TNFRSF1B, CD74, JAK2, PMAIP1, P2RX7, DLL1, PLSCR1, CSRNP3, KLF4, GAS2, EDNRB, TNFRSF14, XAF1, WNT5A, TGFB2, CAMK1D, CX3CL1, TNFRSF10D, VDR, SIX4,…	88
GO:0006915	apoptotic process	84/511	1747/16792	2.33147e-05	0.000535288	4.11191e-05	CASP10, PTGFR, LRP6, STAT1, SOX4, CD274, MX1, TNFSF10, IDO1, PML, SFRP1, ICAM1, INHBA, NKX3-1, CCL5, RBCK1, LGALS9, IFIT2, ZMAT3, IGFBP3, IFIT3, NGEF, CXCR4, SKIL, FAP, CADM1, IL31RA, AIM2, VNN1, IL12A, AMIGO2, CASP4, FLT3LG, IL1A, CASP1, TNFRSF1B, CD74, JAK2, PMAIP1, P2RX7, DLL1, PLSCR1, CSRNP3, KLF4, GAS2, EDNRB, TNFRSF14, XAF1, WNT5A, TGFB2, CAMK1D, CX3CL1, TNFRSF10D, VDR, SIX4, MUC1, IRF1, RA…	84
GO:0045619	regulation of lymphocyte differentiation	16/511	140/16792	2.35207e-05	0.000537932	4.12324e-05	IL12RB1, HLA-DOA, HLA-G, VNN1, IL7, IL12A, ID2, IL15RA, FLT3LG, CD74, IL15, SFRP1, EGR3, INHBA, LGALS9, IRF1	16
GO:0002709	regulation of T cell mediated immunity	10/511	52/16792	2.35554e-05	0.000536653	4.12324e-05	IL12RB1, P2RX7, FZD5, IL12A, CEACAM1, HLA-B, B2M, HLA-E, HLA-A, RSAD2	10
GO:0032729	positive regulation of interferon-gamma production	11/511	65/16792	2.44225e-05	0.000554272	4.25907e-05	PDE4B, IL12RB1, HLA-DPA1, FZD5, LGALS9, HLA-DPB1, TLR3, IL12A, HLA-A, WNT5A, IL27RA	11
GO:0002821	positive regulation of adaptive immune response	12/511	79/16792	2.54501e-05	0.000575382	4.42177e-05	IL12RB1, P2RX7, FZD5, CD40, IL12A, TNFSF13B, HLA-B, B2M, HLA-E, HLA-A, RSAD2, IL27RA	12
GO:0002695	negative regulation of leukocyte activation	16/511	142/16792	2.78403e-05	0.000627013	4.81914e-05	IL31RA, HLA-G, CD274, PDCD1LG2, CEACAM1, ID2, IDO1, PDE5A, TNFRSF14, SFRP1, CD74, INHBA, HMOX1, LGALS9, IRF1, GPNMB	16
GO:0042590	antigen processing and presentation of exogenous peptide antigen via MHC class I	11/511	66/16792	2.80129e-05	0.000628509	4.83112e-05	HLA-G, HLA-C, HLA-B, B2M, PSME1, HLA-F, HLA-E, HLA-A, PSMB10, PSMB9, PSMB8	11
GO:0002573	myeloid leukocyte differentiation	19/511	195/16792	2.8879e-05	0.000645492	4.96218e-05	CASP10, IL31RA, CSF1, LRRC17, PIR, UBASH3B, CEACAM1, ID2, SFRP1, INHBA, BATF2, CDK6, LGALS9, BATF3, TLR3, RBP1, F2RL1, IRF7, RASSF2	19
GO:2001236	regulation of extrinsic apoptotic signaling pathway	17/511	161/16792	3.24429e-05	0.000722399	5.55414e-05	ACSL5, IL7, TNFSF10, PML, IL1A, SFRP1, ICAM1, PMAIP1, INHBA, TGFB2, RBCK1, DEPTOR, HMOX1, CX3CL1, ATF3, IFI6, SKIL	17
GO:0002819	regulation of adaptive immune response	15/511	128/16792	3.47401e-05	0.000770633	5.9257e-05	IL12RB1, CD40, FZD5, IL12A, TNFSF13B, CEACAM1, P2RX7, IRF1, HLA-B, B2M, HLA-E, HLA-A, IRF7, RSAD2, IL27RA	15
GO:0051093	negative regulation of developmental process	44/511	739/16792	3.5616e-05	0.000787111	6.05302e-05	EDNRB, CXCL10, STAT1, HES1, BHLHE41, UBASH3B, RFLNB, IL15RA, PML, ADAMTS12, SFRP1, DPYSL3, SPARC, WNT5A, INHBA, TGFB2, NKX3-1, POSTN, FZD7, NGEF, SIX4, IRF1, COL5A1, COL3A1, PTN, HLA-G, GBP1, LRRC17, ZHX2, ID2, CEACAM1, CD74, SOST, CSRP3, DLL1, CDK6, SEMA3F, TLR3, SEMA5A, GPR4, ID4, KLF4, SEMA6D, B2M	44
GO:0001909	leukocyte mediated cytotoxicity	12/511	82/16792	3.63323e-05	0.000799952	6.15239e-05	IL12RB1, P2RX7, CADM1, LGALS9, MICB, IL12A, CEACAM1, HLA-B, F2RL1, B2M, HLA-E, HLA-A	12
GO:0030154	cell differentiation	150/511	3652/16792	3.6772e-05	0.000806631	6.20436e-05	ARHGEF26, VAMP5, LRP6, STAT1, HES1, PARVA, STEAP4, SLC7A11, PML, NRCAM, SFRP1, HHIP, ENAH, CUX1, CXADR, ANK2, NUMA1, FZD7, NGEF, IGFBP3, RBP1, COL5A1, F2RL1, SKIL, PLXNC1, CADM1, IL31RA, COL3A1, ISG15, SULT1E1, HLA-G, VNN1, MMP8, ZHX2, PIR, FLT3LG, IL1A, JAK2, DHCR7, VCAM1, A2M, DLL1, RXFP1, SEMA3F, COL1A1, ID4, WASF3, SEMA6D, TMEM119, EDNRB, CSF1, SOCS1, PDE5A, ADAM12, GSTK1, TGFB2, HERC6, VDR, …	150
GO:0009611	response to wounding	40/511	649/16792	4.08431e-05	0.000892592	6.86647e-05	IRF2, HPSE, PDGFC, UBASH3B, ABAT, SLC7A11, DGKG, DPYSL3, SPARC, WNT5A, TGFB2, CX3CL1, RHOC, FZD7, POSTN, IRF1, COL5A1, F2RL1, F2RL2, FAP, TMEFF2, CD40, COL3A1, TNC, CEACAM1, DOCK9, IL1A, PF4V1, JAK2, SERPINB2, P2RX7, A2M, PLSCR1, HMOX1, DSP, GPR4, COL1A1, KLF4, SERPING1, THBD	40
GO:0051223	regulation of protein transport	44/511	746/16792	4.36948e-05	0.000951377	7.31502e-05	GJA5, HES1, SOX4, CD274, ABAT, MYRIP, SOCS1, PML, SFRP1, TNFRSF14, WNT5A, TGFB2, RBCK1, VSNL1, CCL5, LGALS9, FZD7, POSTN, VEGFC, F2RL1, HLA-E, DDX58, FZD5, CD40, CADM1, EPHA5, GBP1, RHBDF2, AIM2, GSDMD, CD38, IL1A, CASP1, UHMK1, SVIP, JAK2, BMP6, P2RX7, PARP10, TLR3, SEMA5A, IFI27, DACT1, RSAD2	44
GO:0050663	cytokine secretion	17/511	165/16792	4.38242e-05	0.000950699	7.31502e-05	CADM1, AIM2, GBP1, BTN3A2, GSDMD, CD274, BTN3A1, PML, IL1A, CASP1, TNFRSF14, WNT5A, GBP5, P2RX7, LGALS9, POSTN, F2RL1	17
GO:0002698	negative regulation of immune effector process	13/511	100/16792	5.0193e-05	0.00108482	8.3441e-05	BST2, CEACAM1, DHX58, IFIT1, TGFB2, A2M, LGALS9, HMOX1, MICB, HLA-B, SERPING1, HLA-E, HLA-A	13
GO:0032611	interleukin-1 beta production	10/511	57/16792	5.03465e-05	0.00108418	8.3441e-05	GBP5, P2RX7, LGALS9, AIM2, GSDMD, F2RL1, PML, CASP1, WNT5A, JAK2	10
GO:0002706	regulation of lymphocyte mediated immunity	14/511	116/16792	5.09475e-05	0.00109314	8.41387e-05	IL12RB1, CD40, FZD5, CADM1, IL12A, CEACAM1, P2RX7, LGALS9, HLA-B, B2M, HLA-E, RSAD2, HLA-A, IL27RA	14
GO:0008219	cell death	90/511	1958/16792	5.84396e-05	0.00124927	9.6172e-05	CASP10, PTGFR, LRP6, STAT1, SOX4, CD274, MX1, CARD16, TNFSF10, IDO1, PML, SFRP1, ICAM1, INHBA, NKX3-1, CCL5, RBCK1, LGALS9, IFIT2, ZMAT3, IGFBP3, IFIT3, NGEF, CXCR4, SKIL, FAP, CADM1, IL31RA, AIM2, VNN1, IL12A, AMIGO2, GSDMD, CASP4, FLT3LG, IL1A, CASP1, TNFRSF1B, CD74, JAK2, PMAIP1, P2RX7, DLL1, PLSCR1, CSRNP3, KLF4, GAS2, EDNRB, TNFRSF14, XAF1, WNT5A, TGFB2, CAMK1D, CX3CL1, TNFRSF10D, VDR, SIX4,…	90
GO:0032612	interleukin-1 production	11/511	72/16792	6.05037e-05	0.00128872	9.92194e-05	GBP5, P2RX7, LGALS9, AIM2, GSDMD, CEACAM1, F2RL1, PML, CASP1, WNT5A, JAK2	11
GO:0002708	positive regulation of lymphocyte mediated immunity	11/511	74/16792	7.67861e-05	0.00162941	0.00012548	IL12RB1, P2RX7, FZD5, CD40, CADM1, IL12A, HLA-B, B2M, HLA-E, HLA-A, RSAD2	11
GO:0002705	positive regulation of leukocyte mediated immunity	12/511	89/16792	7.82859e-05	0.00165528	0.000127486	IL12RB1, P2RX7, FZD5, CD40, CADM1, IL12A, HLA-B, F2RL1, B2M, HLA-E, HLA-A, RSAD2	12
GO:0008015	blood circulation	33/511	506/16792	7.86945e-05	0.001658	0.000127706	PDE4B, APLN, EDNRB, CXCL10, GJD3, GCH1, GJA5, STAT1, CLIC2, SLC2A5, OXTR, ABAT, ERAP1, PDE5A, ICAM1, TGFB2, CXADR, ANK2, POSTN, VEGFC, F2RL1, PTGS1, ID2, CEACAM1, CD38, CSRP3, JAK2, DLL1, HMOX1, DSP, SERPING1, PKP2, ERAP2	33
GO:0051250	negative regulation of lymphocyte activation	14/511	122/16792	8.62118e-05	0.0018098	0.000139421	HLA-G, CD274, PDCD1LG2, ID2, CEACAM1, IDO1, PDE5A, SFRP1, CD74, TNFRSF14, INHBA, LGALS9, IRF1, GPNMB	14
GO:0030198	extracellular matrix organization	25/511	334/16792	9.09291e-05	0.001902	0.000146261	HPSE, CD47, ABI3BP, SPARC, MFAP5, ICAM1, TGFB2, POSTN, CTSS, ADAMTS2, COL5A1, COL14A1, MMP16, FAP, COL16A1, COL3A1, MMP10, MMP8, BGN, TNC, VCAM1, A2M, RXFP1, COL1A1, CSGALNACT1	25
GO:0070201	regulation of establishment of protein localization	46/511	820/16792	9.12516e-05	0.00190203	0.000146261	GJA5, HES1, SOX4, CD274, ABAT, MYRIP, SOCS1, PML, SFRP1, TNFRSF14, WNT5A, TGFB2, RBCK1, VSNL1, CCL5, LGALS9, FZD7, POSTN, VEGFC, F2RL1, HLA-E, DDX58, FZD5, CD40, CADM1, EPHA5, GBP1, RHBDF2, AIM2, GSDMD, CD38, IL1A, CASP1, UHMK1, SVIP, JAK2, PMAIP1, BMP6, P2RX7, PARP10, RHOQ, TLR3, SEMA5A, IFI27, DACT1, RSAD2	46
GO:0003013	circulatory system process	33/511	510/16792	9.13801e-05	0.00189803	0.000146261	PDE4B, APLN, EDNRB, CXCL10, GJD3, GCH1, GJA5, STAT1, CLIC2, SLC2A5, OXTR, ABAT, ERAP1, PDE5A, ICAM1, TGFB2, CXADR, ANK2, POSTN, VEGFC, F2RL1, PTGS1, ID2, CEACAM1, CD38, CSRP3, JAK2, DLL1, HMOX1, DSP, SERPING1, PKP2, ERAP2	33
GO:0043062	extracellular structure organization	25/511	335/16792	9.56716e-05	0.00198014	0.000152607	HPSE, CD47, ABI3BP, SPARC, MFAP5, ICAM1, TGFB2, POSTN, CTSS, ADAMTS2, COL5A1, COL14A1, MMP16, FAP, COL16A1, COL3A1, MMP10, MMP8, BGN, TNC, VCAM1, A2M, RXFP1, COL1A1, CSGALNACT1	25
GO:0032606	type I interferon production	13/511	108/16792	0.000107019	0.00220703	0.000170126	IFIH1, ISG15, HERC5, ZC3HAV1, UBE2L6, DHX58, TLR3, NMI, IRF1, NLRC5, AZI2, DDX58, IRF7	13
GO:0001959	regulation of cytokine-mediated signaling pathway	15/511	143/16792	0.000117305	0.00241053	0.000185846	CSF1, STAT1, CD24, STAT2, SOCS1, CD74, WNT5A, VRK2, JAK2, RBCK1, CCL5, F2RL1, NLRC5, IRF7, USP18	15
GO:0055074	calcium ion homeostasis	28/511	405/16792	0.000119827	0.0024538	0.000189201	EDNRB, CXCL10, PTGFR, LRP6, PTGER2, CLIC2, OXTR, UBASH3B, PML, CCL5, ANK2, VDR, CXCL11, CCL8, CCL7, CXCR4, F2RL1, F2RL2, CD40, CD24, CD38, CSRP3, JAK2, P2RX7, CXCL9, FAM20A, GPR4, MCUB	28
GO:0048771	tissue remodeling	15/511	144/16792	0.0001264	0.00257932	0.000198908	GJA5, IL7, UBASH3B, BGN, CEACAM1, PML, CD38, IL1A, IL15, SFRP1, TGFB2, P2RX7, CTHRC1, VDR, RASSF2	15
GO:0014070	response to organic cyclic compound	49/511	906/16792	0.000127613	0.0025951	0.000199751	PDE4B, EDNRB, CXCL10, PTGFR, LRP6, PTGER2, PAPPA, STAT1, FBXO32, OXTR, ABAT, ZC3HAV1, SLC7A11, IL15, SFRP1, SPARC, ICAM1, INHBA, NKX3-1, TGFB2, IFIT1, CCL5, POSTN, VDR, NAMPT, MGARP, DDX58, PMEPA1, PTN, EPHA5, CHRNA1, AGO1, TNC, GHR, CD38, CASP1, JAK2, PMAIP1, BMP6, P2RX7, VCAM1, HMOX1, KYNU, TLR3, CIITA, IFI27, COL1A1, KLF4, THBD	49
GO:0090175	regulation of establishment of planar polarity	13/511	110/16792	0.000127791	0.00258982	0.000199751	DAAM1, FZD5, CTHRC1, FZD7, GPC6, ROR1, DACT1, PSME1, SFRP1, WNT5A, PSMB10, PSMB9, PSMB8	13
GO:1903708	positive regulation of hemopoiesis	16/511	163/16792	0.000136327	0.00275317	0.000212383	IL12RB1, CSF1, ISG15, HLA-G, VNN1, ACVR2A, IL7, IL12A, ID2, IL15RA, FLT3LG, CD74, IL15, EGR3, INHBA, LGALS9	16
GO:0030099	myeloid cell differentiation	25/511	343/16792	0.000137112	0.00275959	0.000212896	CASP10, IL31RA, CSF1, ISG15, LRRC17, ACVR2A, PIR, UBASH3B, CEACAM1, ID2, PML, SFRP1, INHBA, JAK2, BATF2, LGALS9, CDK6, DLL1, CDKN2B, BATF3, TLR3, RBP1, F2RL1, IRF7, RASSF2	25
GO:1901701	cellular response to oxygen-containing compound	49/511	912/16792	0.000143519	0.00287859	0.000222106	PDE4B, EDNRB, IL18BP, CXCL10, LRP6, PTGER2, STAT1, SOX4, PDGFC, FBXO32, SLC2A5, SOCS1, SFRP1, IL15, WNT5A, ICAM1, INHBA, VSNL1, CCL5, POSTN, VDR, FZD7, CCL7, MUC1, NAMPT, PTPRN2, BAIAP2L1, MGARP, CXCL8, COL16A1, CD40, COL3A1, PTN, EPHA5, IL12A, TNC, CASP4, CEACAM1, GHR, TNFRSF1B, JAK2, BMP6, CMPK2, CDK6, RHOQ, COL1A1, KLF4, CXCL16, B2M	49
GO:0032479	regulation of type I interferon production	13/511	112/16792	0.000151927	0.00303671	0.000234343	IFIH1, ISG15, TRIM21, ZC3HAV1, UBE2L6, HERC5, DHX58, TLR3, NMI, IRF1, NLRC5, IRF7, DDX58	13
GO:0007267	cell-cell signaling	72/511	1517/16792	0.000154602	0.00307971	0.000237684	CXCL10, LRP6, GJA5, SOX4, HES1, BST2, RNF213, OXTR, MYRIP, TNFSF10, SFRP1, GLS, GLRB, PCLO, INHBA, NKX3-1, VSNL1, CCL5, CTHRC1, ANK2, FZD7, CCL8, CCL7, NAMPT, CHRNA1, AGO1, GRIA3, SOST, JAK2, PSMB8, P2RX7, DLL1, COL1A1, KLF4, DACT1, SLC12A7, PKP2, PTPRD, APLN, EGR2, ABAT, SHC3, IL15, WNT5A, TGFB2, CXCL5, CXCL11, GPC6, CXCL6, PTPRN2, RAB3B, PSMB10, PSMB9, FZD5, MOV10, PTN, EPHA5, CPE, IL7, CD24, T…	72
GO:1903038	negative regulation of leukocyte cell-cell adhesion	12/511	96/16792	0.000156231	0.00310169	0.000239401	LGALS9, HLA-G, CD274, PDCD1LG2, KLF4, CEACAM1, IRF1, IDO1, GPNMB, PDE5A, TNFRSF14, CD74	12
GO:0045621	positive regulation of lymphocyte differentiation	11/511	81/16792	0.000166122	0.00328675	0.000253726	IL12RB1, LGALS9, HLA-G, VNN1, IL12A, IL7, IL15RA, FLT3LG, IL15, CD74, EGR3	11
GO:0030217	T cell differentiation	18/511	204/16792	0.000169163	0.00333567	0.000257529	IL12RB1, FZD5, RUNX2, HLA-G, VNN1, SOX4, IL12A, IL7, ITK, CD74, IL15, EGR3, CDK6, LGALS9, FZD7, IRF1, B2M, RSAD2	18
GO:0050715	positive regulation of cytokine secretion	12/511	97/16792	0.000171483	0.00337013	0.000260213	P2RX7, CADM1, LGALS9, POSTN, AIM2, GSDMD, CD274, F2RL1, IL1A, CASP1, TNFRSF14, WNT5A	12
GO:0048646	anatomical structure formation involved in morphogenesis	58/511	1151/16792	0.000176442	0.00345598	0.000266872	CXCL10, LRP6, HPSE, GJA5, STAT1, HES1, SOX4, PARVA, RNF213, KIF26B, TSPAN12, WARS, PML, TNFAIP2, NRCAM, SFRP1, INHBA, NKX3-1, CTHRC1, ANK2, TMEM100, FZD7, COL5A1, SKIL, FAP, CXCL8, MMP8, CEACAM1, FLT3LG, IL1A, FAM20A, DLL1, COL1A1, KLF4, EGR2, TNFSF13B, ERAP1, ADAM12, C10orf90, SPARC, WNT5A, TGFB2, TYMP, CX3CL1, VEGFC, SIX4, PODXL, TENM4, ALDH1A3, FZD5, PTN, CSRP3, EGR3, CXCL9, HMOX1, SEMA5A, GPR…	58
GO:0050852	T cell receptor signaling pathway	16/511	167/16792	0.000178468	0.00348408	0.000269066	PDE4B, HLA-DPA1, HLA-DPB1, HLA-DQA1, GBP1, HLA-DQB1, BTN3A1, CEACAM1, PSME1, ITK, PSMB8, RBCK1, THEMIS2, PSMB10, HLA-DRA, PSMB9	16
GO:0070555	response to interleukin-1	13/511	114/16792	0.00017986	0.00349967	0.000270292	NKX3-1, CCL5, LGALS9, CX3CL1, CCL8, CCL7, GHR, IL1A, CD38, ADAMTS12, SFRP1, ICAM1, CXCL8	13
GO:0006874	cellular calcium ion homeostasis	27/511	393/16792	0.000181753	0.00352487	0.000272262	EDNRB, CXCL10, PTGFR, LRP6, PTGER2, CLIC2, UBASH3B, OXTR, PML, CCL5, ANK2, VDR, CXCL11, CCL8, CCL7, CXCR4, F2RL1, F2RL2, CD40, CD24, CD38, CSRP3, JAK2, P2RX7, CXCL9, GPR4, MCUB	27
GO:0002764	immune response-regulating signaling pathway	33/511	531/16792	0.000188399	0.00364162	0.000281315	PDE4B, IFIH1, ZC3HAV1, ITK, RBCK1, THEMIS2, LGALS9, MICB, DDX60, CTSS, IRF1, F2RL1, PSMB10, DDX58, PSMB9, HLA-DPA1, CD40, HLA-DPB1, HLA-DQA1, HLA-G, GBP1, HLA-DQB1, BTN3A1, CD24, CEACAM1, PSME1, DHX58, CD38, PSMB8, TLR3, RSAD2, IRF7, HLA-DRA	33
GO:0050707	regulation of cytokine secretion	15/511	150/16792	0.000194882	0.00375446	0.000290069	CADM1, AIM2, GBP1, GSDMD, CD274, PML, IL1A, SOCS1, CASP1, TNFRSF14, WNT5A, P2RX7, LGALS9, POSTN, F2RL1	15
GO:0071396	cellular response to lipid	32/511	509/16792	0.00019879	0.00381721	0.000294947	PDE4B, EDNRB, CXCL10, LRP6, FBXO32, SFRP1, IL15, WNT5A, ICAM1, INHBA, NKX3-1, CCL5, FZD7, VDR, MUC1, MGARP, CXCL8, CD40, PMEPA1, PTN, EPHA5, IL12A, TNC, TNFRSF1B, BMP6, JAK2, CMPK2, CDK6, COL1A1, KLF4, CXCL16, B2M	32
GO:0055065	metal ion homeostasis	34/511	558/16792	0.000214143	0.00409816	0.000316721	EDNRB, CXCL10, PTGFR, LRP6, PTGER2, CLIC2, OXTR, UBASH3B, STEAP4, PML, CCL5, ANK2, VDR, CCL8, CXCL11, CCL7, CXCR4, F2RL1, F2RL2, CD40, CD24, CD38, SCN7A, CSRP3, JAK2, BMP6, P2RX7, CXCL9, HMOX1, FAM20A, GPR4, SLC25A28, B2M, MCUB	34
GO:0043408	regulation of MAPK cascade	39/511	678/16792	0.000215341	0.00410777	0.000317487	PDGFC, PDE5A, SFRP1, TNFRSF14, WNT5A, ICAM1, INHBA, TGFB2, CCL5, PTPRR, LGALS9, CX3CL1, FZD7, CCL8, CCL7, IGFBP3, CXCR4, F2RL1, RASSF2, FZD5, PELI2, CD40, GBP1, CD24, CEACAM1, GHR, IL1A, TNFRSF1B, CD74, VRK2, JAK2, BMP6, P2RX7, TLR3, ATF3, DACT1, KLF4, GPNMB, ACKR3	39
GO:0001501	skeletal system development	31/511	490/16792	0.000229709	0.00436723	0.000336868	RUNX2, EXT1, LRP6, GJA5, SOX4, ANKH, PDGFC, RFLNB, HAPLN3, ADAMTS12, SFRP1, SPARC, HHIP, WNT5A, TGFB2, MGP, INSIG1, POSTN, VDR, SIX4, MMP16, RASSF2, COL3A1, LRRC17, ACVR2A, GHR, BMP6, P2RX7, COL1A1, CSGALNACT1, TMEM119	31
GO:0002822	regulation of adaptive immune response based on somatic recombination of immune receptors built from immunoglobulin superfamily domains	13/511	117/16792	0.000229928	0.00435739	0.000336868	IL12RB1, CD40, FZD5, IL12A, TNFSF13B, CEACAM1, P2RX7, HLA-B, B2M, HLA-E, RSAD2, HLA-A, IL27RA	13
GO:0008217	regulation of blood pressure	16/511	171/16792	0.000231465	0.00437248	0.000337007	APLN, EDNRB, GCH1, GJA5, PTGS1, SLC2A5, OXTR, ABAT, ID2, ERAP1, HMOX1, DLL1, POSTN, VEGFC, F2RL1, ERAP2	16
GO:0007584	response to nutrient	16/511	171/16792	0.000231465	0.00437248	0.000337007	CXCL10, PTN, STAT1, TNC, SFRP1, IL15, SPARC, C2, VCAM1, CDKN2B, HMOX1, KYNU, VDR, POSTN, COL1A1, RBP1	16
GO:0045778	positive regulation of ossification	11/511	85/16792	0.000248385	0.0046765	0.00036052	TGFB2, P2RX7, RUNX2, CTHRC1, ISG15, IFITM1, ACVR2A, ID4, TMEM119, WNT5A, BMP6	11
GO:0001932	regulation of protein phosphorylation	63/511	1300/16792	0.000255517	0.00479523	0.000369723	CXCL10, LRP6, HES1, STAT2, UBASH3B, PML, SFRP1, ICAM1, INHBA, NKX3-1, CCL5, LGALS9, FZD7, CCL8, CCL7, IGFBP3, CXCR4, F2RL1, PELI2, IL31RA, IL12A, BGN, CEACAM1, FLT3LG, IL1A, TNFRSF1B, CD74, VRK2, JAK2, P2RX7, FAM20A, KLF4, DACT1, EDNRB, CSF1, PDGFC, HERC5, SOCS1, PDE5A, TNFRSF14, IL15, WNT5A, TGFB2, PTPRR, CDKN2B, CX3CL1, VEGFC, RASSF2, FZD5, CD40, PMEPA1, GBP1, ACVR2A, CD24, GHR, BMP6, PKIB, DEP…	63
GO:0031348	negative regulation of defense response	15/511	154/16792	0.000256554	0.00479945	0.000370078	CEACAM1, DHX58, TNFRSF1B, TRAFD1, IFIT1, A2M, LGALS9, MICB, NMI, KLF4, HLA-B, NLRC5, SERPING1, HLA-E, HLA-A	15
GO:0032880	regulation of protein localization	50/511	962/16792	0.000269408	0.00502348	0.000387424	GJA5, HES1, SOX4, CD274, MYRIP, PML, SFRP1, VSNL1, RBCK1, CCL5, LGALS9, FZD7, F2RL1, TBC1D1, CADM1, RHBDF2, AIM2, GSDMD, IL1A, SLC26A4, CASP1, SVIP, PMAIP1, JAK2, P2RX7, DACT1, ABAT, SOCS1, TNFRSF14, WNT5A, TGFB2, POSTN, VEGFC, SIX4, HLA-E, DDX58, CD40, FZD5, PTN, EPHA5, GBP1, CD38, UHMK1, BMP6, PARP10, RHOQ, TLR3, IFI27, SEMA5A, RSAD2	50
GO:0033273	response to vitamin	11/511	86/16792	0.000273579	0.00508507	0.000392136	CXCL10, KYNU, PTN, POSTN, VDR, COL1A1, RBP1, TNC, IL15, SFRP1, SPARC	11
GO:0071219	cellular response to molecule of bacterial origin	15/511	155/16792	0.000274363	0.00508365	0.000392136	PDE4B, CD40, EDNRB, FZD5, CXCL10, IL12A, TNFRSF1B, WNT5A, ICAM1, BMP6, CCL5, CMPK2, B2M, CXCL16, CXCL8	15
GO:0002702	positive regulation of production of molecular mediator of immune response	10/511	71/16792	0.000286219	0.00528627	0.000407835	FZD5, CD40, F2RL1, B2M, TNFRSF14, CD74, HLA-E, HLA-A, WNT5A, RSAD2	10
GO:0051246	regulation of protein metabolic process	106/511	2512/16792	0.000320169	0.00589317	0.000454823	LRP6, GSAP, RNF128, HES1, BST2, STAT2, TNFSF10, PML, SFRP1, NKX3-1, CCL5, FZD7, CCL8, CCL7, IGFBP3, F2RL1, PELI2, IL31RA, ISG15, AIM2, FLT3LG, IL1A, SVIP, JAK2, PMAIP1, A2M, P2RX7, LXN, EDNRB, CSF1, PDGFC, HERC5, SOCS1, PDE5A, TNFRSF14, TGFB2, PTPRR, CX3CL1, VEGFC, MUC1, CFB, PSMB10, PSMB9, RASSF2, ANOS1, GBP1, ACVR2A, CD24, EIF3F, SERPINB2, PKIB, C2, PARP10, CYCS, DEPTOR, IFI27, CCND2, SERPING1,…	106
GO:0032270	positive regulation of cellular protein metabolic process	67/511	1420/16792	0.000326679	0.00599405	0.000462666	RNF19B, RNF114, RNF128, SOX4, HES1, TNFSF10, PML, ICAM1, INHBA, NKX3-1, CCL5, LGALS9, FZD7, CCL8, CCL7, IGFBP3, CXCR4, F2RL1, PELI2, IL31RA, AIM2, IL12A, NUB1, FLT3LG, IL1A, CASP1, TNFRSF1B, CD74, SVIP, JAK2, PMAIP1, PSMB8, P2RX7, FAM20A, NMI, KLF4, DACT1, PRR16, EDNRB, CSF1, PDGFC, SOCS1, PDE5A, IL15, TNFRSF14, WNT5A, TGFB2, CX3CL1, VEGFC, MUC1, PSMB10, RASSF2, PSMB9, FZD5, CD40, ACVR2A, CD24, P…	67
GO:0065009	regulation of molecular function	118/511	2863/16792	0.000328095	0.00600137	0.000463266	ARHGEF26, LRP6, GCH1, HES1, CLIC2, BST2, TNFSF10, PML, SFRP1, NKX3-1, CAP2, CCL5, RBCK1, ANK2, CCL8, IGFBP3, NGEF, CCL7, CTSS, ARHGAP20, AIM2, JAK2, PMAIP1, A2M, P2RX7, OAS1, PLSCR1, CSRNP3, SUGT1, LXN, PDE4B, EDNRB, CSF1, PDGFC, HERC5, SHC3, SOCS1, PDE5A, TGFB2, SERINC5, CX3CL1, VDR, ARHGEF37, DDX58, PSMB10, OAS3, PSMB9, RASSF2, ANOS1, PTN, FOXS1, ACVR2A, CD24, RALGPS2, SERPINB2, PKIB, PARP10, C…	118
GO:0007596	blood coagulation	24/511	342/16792	0.00032943	0.00600718	0.000463733	CD40, COL3A1, IRF2, HPSE, PDGFC, UBASH3B, CEACAM1, ABAT, DOCK9, DGKG, PF4V1, SLC7A11, SERPINB2, JAK2, P2RX7, A2M, PLSCR1, COL1A1, IRF1, F2RL1, SERPING1, F2RL2, FAP, THBD	24
GO:1902106	negative regulation of leukocyte differentiation	11/511	88/16792	0.000330409	0.0060065	0.000463733	CDK6, TLR3, HLA-G, LRRC17, UBASH3B, CEACAM1, ID2, IRF1, CD74, SFRP1, INHBA	11
GO:0071496	cellular response to external stimulus	20/511	257/16792	0.000337487	0.00611603	0.000471103	CD40, PTN, GSDMD, TNC, CASP1, SFRP1, IL15, ICAM1, BMP6, PMAIP1, P2RX7, HMOX1, CDKN2B, TLR3, VDR, ATF3, POSTN, COL1A1, IRF1, CADPS2	20
GO:0019058	viral life cycle	29/511	455/16792	0.000339322	0.00613044	0.000471103	IFITM1, BST2, TAP2, MX1, ZC3HAV1, OASL, PML, TAP1, TNFRSF14, ICAM1, TRIM14, IFIT1, CCL5, ZNF571, LGALS9, CXADR, CXCR4, C19orf66, CXCL8, OAS3, ISG15, TRIM21, EIF3F, APOBEC3G, PARP10, PLSCR1, OAS1, ISG20, RSAD2	29
GO:0001736	establishment of planar polarity	13/511	122/16792	0.000339693	0.00611846	0.000471103	DAAM1, FZD5, CTHRC1, FZD7, GPC6, ROR1, DACT1, PSME1, SFRP1, WNT5A, PSMB10, PSMB9, PSMB8	13
GO:0007164	establishment of tissue polarity	13/511	122/16792	0.000339693	0.00611846	0.000471103	DAAM1, FZD5, CTHRC1, FZD7, GPC6, ROR1, DACT1, PSME1, SFRP1, WNT5A, PSMB10, PSMB9, PSMB8	13
GO:0032268	regulation of cellular protein metabolic process	100/511	2346/16792	0.00034875	0.00626209	0.000482233	LRP6, HES1, RNF128, BST2, STAT2, TNFSF10, PML, SFRP1, NKX3-1, CCL5, FZD7, CCL8, CCL7, IGFBP3, F2RL1, PELI2, IL31RA, ISG15, AIM2, FLT3LG, IL1A, SVIP, JAK2, PMAIP1, A2M, P2RX7, LXN, EDNRB, CSF1, PDGFC, HERC5, SOCS1, PDE5A, TNFRSF14, TGFB2, PTPRR, CX3CL1, VEGFC, MUC1, PSMB10, PSMB9, RASSF2, ANOS1, GBP1, ACVR2A, CD24, EIF3F, SERPINB2, PKIB, PARP10, CYCS, DEPTOR, IFI27, CCND2, SERPING1, RNF19B, CLN8, …	100
GO:0072507	divalent inorganic cation homeostasis	28/511	433/16792	0.000351536	0.0062929	0.000484651	EDNRB, CXCL10, PTGFR, LRP6, PTGER2, CLIC2, OXTR, UBASH3B, PML, CCL5, ANK2, VDR, CXCL11, CCL8, CCL7, CXCR4, F2RL1, F2RL2, CD40, CD24, CD38, CSRP3, JAK2, P2RX7, CXCL9, FAM20A, GPR4, MCUB	28
GO:0097529	myeloid leukocyte migration	15/511	159/16792	0.000356617	0.00636436	0.000490211	PDE4B, EDNRB, CSF1, CXCL10, IL1A, CD74, TGFB2, CCL5, CXADR, CAMK1D, CX3CL1, VEGFC, CCL8, CCL7, CXCL8	15
GO:0050868	negative regulation of T cell activation	11/511	89/16792	0.000362324	0.00644647	0.000496594	LGALS9, HLA-G, CD274, PDCD1LG2, CEACAM1, IRF1, IDO1, GPNMB, PDE5A, TNFRSF14, CD74	11
GO:0042592	homeostatic process	75/511	1645/16792	0.00036664	0.00650351	0.000501041	CXCL10, PTGFR, LRP6, PTGER2, GJA5, STAT1, SOX4, CLIC2, UBASH3B, OXTR, PML, STEAP4, ICAM1, INHBA, IFIT1, VSNL1, CCL5, CXADR, LGALS9, ANK2, CCL8, CCL7, CXCR4, F2RL1, SKIL, F2RL2, IL31RA, ISG15, CHRNA1, ID2, FLT3LG, SLC26A4, IL1A, CD74, JAK2, PMAIP1, P2RX7, OAS1, FAM20A, DLL1, SLC25A28, SLC12A7, PKP2, PDE4B, APLN, EDNRB, CSF1, TNFSF13B, TAP2, ABAT, TAP1, TGFB2, VDR, CXCL11, PTPRN2, RASSF2, CD40, EPH…	75
GO:0051247	positive regulation of protein metabolic process	70/511	1508/16792	0.000375818	0.00664591	0.000512086	RNF19B, RNF114, GSAP, RNF128, SOX4, HES1, TNFSF10, PML, ICAM1, INHBA, NKX3-1, CCL5, LGALS9, FZD7, CCL8, CCL7, IGFBP3, CXCR4, F2RL1, PELI2, IL31RA, AIM2, IL12A, NUB1, FLT3LG, IL1A, CASP1, TNFRSF1B, CD74, SVIP, JAK2, PMAIP1, PSMB8, P2RX7, FAM20A, NMI, KLF4, DACT1, PRR16, EDNRB, CSF1, PDGFC, SOCS1, PDE5A, IL15, TNFRSF14, WNT5A, TGFB2, CX3CL1, VEGFC, MUC1, IRF1, PSMB10, RASSF2, PSMB9, FZD5, CD40, ACV…	70
GO:0072503	cellular divalent inorganic cation homeostasis	27/511	413/16792	0.000388312	0.00684571	0.000527572	EDNRB, CXCL10, PTGFR, LRP6, PTGER2, CLIC2, UBASH3B, OXTR, PML, CCL5, ANK2, VDR, CXCL11, CCL8, CCL7, CXCR4, F2RL1, F2RL2, CD40, CD24, CD38, CSRP3, JAK2, P2RX7, CXCL9, GPR4, MCUB	27
GO:0050801	ion homeostasis	39/511	699/16792	0.000393312	0.006913	0.000532817	EDNRB, CXCL10, LRP6, PTGFR, PTGER2, GJA5, CLIC2, OXTR, UBASH3B, STEAP4, PML, CCL5, ANK2, VDR, CCL8, CXCL11, CCL7, CXCR4, F2RL1, F2RL2, CD40, CD24, CD38, SLC26A4, SCN7A, CSRP3, JAK2, BMP6, P2RX7, CXCL9, HMOX1, FAM20A, GPR4, SLC25A28, B2M, IFI6, MCUB, SFRP4, SLC26A2	39
GO:0051222	positive regulation of protein transport	29/511	460/16792	0.000402111	0.00704624	0.000543162	SOX4, HES1, CD274, ABAT, MYRIP, TNFRSF14, WNT5A, TGFB2, RBCK1, VSNL1, LGALS9, POSTN, VEGFC, F2RL1, HLA-E, DDX58, FZD5, CADM1, AIM2, GSDMD, CD38, IL1A, CASP1, BMP6, JAK2, P2RX7, TLR3, SEMA5A, DACT1	29
GO:0060071	Wnt signaling pathway, planar cell polarity pathway	12/511	107/16792	0.000407052	0.0071115	0.000548252	DAAM1, FZD5, CTHRC1, FZD7, GPC6, ROR1, PSME1, SFRP1, WNT5A, PSMB10, PSMB9, PSMB8	12
GO:0044765	single-organism transport	136/511	3415/16792	0.000430685	0.00750081	0.000578416	VAMP5, LRP6, HES1, CLIC2, CD274, OXTR, STEAP4, SLC7A11, PML, SFRP1, GLS, GLRB, NKX3-1, RBCK1, CCL5, CXADR, ANK2, APOL3, FZD7, CCL8, CTSS, F2RL1, SLC14A1, APOL1, PRSS12, CADM1, APOL2, AIM2, GSDMD, APOL4, APOL6, IL1A, SLC26A4, TSPAN13, JAK2, P2RX7, A2M, SLC12A7, CDC42SE2, APLN, PDE4B, EDNRB, GJD3, ANKH, TAP2, TNFSF13B, ABAT, TAPBP, TAP1, SOCS1, TNFRSF14, SPARC, TGFB2, SERINC5, ANO4, VDR, VEGFC, CXC…	136
GO:0035295	tube development	34/511	580/16792	0.000432103	0.00750337	0.000578657	EDNRB, CSF1, LRP6, GJA5, STAT1, HES1, SOX4, PDGFC, OXTR, KIF26B, PML, SFRP1, HHIP, SPARC, WNT5A, TGFB2, NKX3-1, CTHRC1, NUMA1, VDR, SIX4, ADAMTS2, PODXL, CXCL8, COL3A1, PTN, SALL2, CD24, TNC, ID2, DHCR7, DLL1, RXFP1, DACT1	34
GO:0043123	positive regulation of I-kappaB kinase/NF-kappaB signaling	16/511	182/16792	0.000452561	0.00783435	0.000604323	CASP10, CD40, PELI2, BST2, TNFSF10, ZC3HAV1, IL1A, CASP1, RBCK1, HMOX1, LGALS9, RHOC, APOL3, TLR3, F2RL1, SECTM1	16
GO:0010721	negative regulation of cell development	22/511	306/16792	0.000457011	0.00788806	0.000608526	EDNRB, COL3A1, PTN, GBP1, ZHX2, HES1, STAT1, RFLNB, ID2, IL15RA, SFRP1, WNT5A, DPYSL3, TGFB2, DLL1, SEMA3F, SEMA5A, POSTN, NGEF, ID4, SEMA6D, B2M	22
GO:0098771	inorganic ion homeostasis	37/511	658/16792	0.000498237	0.00857176	0.000661534	EDNRB, CXCL10, PTGFR, LRP6, PTGER2, CLIC2, OXTR, UBASH3B, STEAP4, PML, CCL5, ANK2, VDR, CCL8, CXCL11, CCL7, CXCR4, F2RL1, F2RL2, CD40, CD24, CD38, SLC26A4, SCN7A, CSRP3, JAK2, BMP6, P2RX7, CXCL9, HMOX1, FAM20A, GPR4, SLC25A28, B2M, MCUB, SFRP4, SLC26A2	37
GO:0031399	regulation of protein modification process	75/511	1664/16792	0.000502477	0.00861939	0.000665274	CXCL10, LRP6, SOX4, HES1, STAT2, UBASH3B, PML, SFRP1, ICAM1, INHBA, NKX3-1, CCL5, LGALS9, FZD7, CCL8, CCL7, IGFBP3, CXCR4, F2RL1, PELI2, IL31RA, ISG15, IL12A, TRIM21, BGN, CEACAM1, FLT3LG, IL1A, TNFRSF1B, CD74, SVIP, VRK2, JAK2, PSMB8, P2RX7, EID1, FAM20A, NMI, KLF4, DACT1, EDNRB, CSF1, PDGFC, HERC5, SOCS1, PDE5A, IL15, TNFRSF14, WNT5A, TGFB2, PTPRR, CDKN2B, CX3CL1, VEGFC, MUC1, PSMB10, RASSF2, P…	75
GO:0048872	homeostasis of number of cells	18/511	224/16792	0.000507777	0.00868479	0.000670392	PDE4B, CSF1, ISG15, ACVR2A, IL7, TNFSF13B, ID2, FLT3LG, CD74, JAK2, PMAIP1, INHBA, TGFB2, P2RX7, HMOX1, LGALS9, SKIL, RASSF2	18
GO:0032963	collagen metabolic process	12/511	110/16792	0.000516303	0.00880461	0.000679728	P2RX7, COL3A1, MMP10, CIITA, MMP8, CTSS, ADAMTS2, COL1A1, CYGB, COL5A1, MMP16, FAP	12
GO:0042325	regulation of phosphorylation	65/511	1393/16792	0.000546147	0.0092846	0.000717	CXCL10, LRP6, HES1, STAT2, UBASH3B, PML, SFRP1, ICAM1, INHBA, NKX3-1, CCL5, LGALS9, FZD7, CCL8, CCL7, IGFBP3, CXCR4, F2RL1, PELI2, IL31RA, IL12A, BGN, CEACAM1, FLT3LG, IL1A, TNFRSF1B, CD74, VRK2, JAK2, P2RX7, FAM20A, KLF4, DACT1, APLN, EDNRB, CSF1, PDGFC, HERC5, SOCS1, PDE5A, IL15, TNFRSF14, WNT5A, TGFB2, PTPRR, CDKN2B, CX3CL1, VEGFC, RASSF2, FZD5, CD40, PMEPA1, GBP1, ACVR2A, CD24, GHR, BMP6, PKI…	65
GO:1990266	neutrophil migration	11/511	94/16792	0.000562976	0.00954203	0.000737022	PDE4B, TGFB2, CCL5, CXADR, CAMK1D, CX3CL1, CCL8, CCL7, IL1A, CD74, CXCL8	11
GO:0022604	regulation of cell morphogenesis	33/511	568/16792	0.000615361	0.0103958	0.000803352	GAS2, STAT1, PARVA, NRCAM, SFRP1, SPARC, WNT5A, ICAM1, TGFB2, CUX1, POSTN, NGEF, CCL7, SKIL, ATP10A, PLXNC1, TBC1D1, PTN, GBP1, PALMD, PDZD8, VRK2, RHOQ, SEMA3F, SEMA5A, SDC2, COL1A1, EVI5, SEMA6D, WASF3, FGD4, CDC42SE2, PTPRD	33
GO:0071222	cellular response to lipopolysaccharide	14/511	149/16792	0.0006253	0.0105329	0.000814054	PDE4B, EDNRB, CD40, CXCL10, IL12A, TNFRSF1B, WNT5A, BMP6, ICAM1, CCL5, CMPK2, B2M, CXCL16, CXCL8	14
GO:0050817	coagulation	24/511	358/16792	0.000635673	0.0106764	0.000822973	CD40, COL3A1, IRF2, HPSE, PDGFC, UBASH3B, CEACAM1, ABAT, DOCK9, DGKG, PF4V1, SLC7A11, SERPINB2, JAK2, P2RX7, A2M, PLSCR1, COL1A1, IRF1, F2RL1, SERPING1, F2RL2, FAP, THBD	24
GO:0007599	hemostasis	24/511	358/16792	0.000635673	0.0106764	0.000822973	CD40, COL3A1, IRF2, HPSE, PDGFC, UBASH3B, CEACAM1, ABAT, DOCK9, DGKG, PF4V1, SLC7A11, SERPINB2, JAK2, P2RX7, A2M, PLSCR1, COL1A1, IRF1, F2RL1, SERPING1, F2RL2, FAP, THBD	24
GO:0055080	cation homeostasis	36/511	643/16792	0.000645825	0.0108154	0.000833807	EDNRB, CXCL10, PTGFR, LRP6, PTGER2, CLIC2, OXTR, UBASH3B, STEAP4, PML, CCL5, ANK2, VDR, CCL8, CXCL11, CCL7, CXCR4, F2RL1, F2RL2, CD40, CD24, CD38, SLC26A4, SCN7A, CSRP3, JAK2, BMP6, P2RX7, CXCL9, HMOX1, FAM20A, GPR4, SLC25A28, B2M, MCUB, SLC26A2	36
GO:0002761	regulation of myeloid leukocyte differentiation	12/511	113/16792	0.000649042	0.0108383	0.00083395	CSF1, CDK6, TLR3, LRRC17, RBP1, UBASH3B, CEACAM1, ID2, SFRP1, IRF7, RASSF2, INHBA	12
GO:1902107	positive regulation of leukocyte differentiation	13/511	131/16792	0.000649504	0.0108156	0.00083395	IL12RB1, CSF1, HLA-G, VNN1, IL7, IL12A, ID2, FLT3LG, IL15RA, IL15, CD74, EGR3, LGALS9	13
GO:0002757	immune response-activating signal transduction	30/511	498/16792	0.000665289	0.011046	0.000851877	PDE4B, IFIH1, ZC3HAV1, ITK, RBCK1, THEMIS2, LGALS9, MICB, DDX60, CTSS, IRF1, F2RL1, PSMB10, DDX58, PSMB9, HLA-DPA1, HLA-DPB1, HLA-DQA1, GBP1, HLA-DQB1, BTN3A1, CEACAM1, PSME1, DHX58, CD38, PSMB8, TLR3, RSAD2, IRF7, HLA-DRA	30
GO:0097530	granulocyte migration	12/511	114/16792	0.000699148	0.0115727	0.000892787	PDE4B, TGFB2, CCL5, CSF1, CXADR, CAMK1D, CX3CL1, CCL8, CCL7, IL1A, CD74, CXCL8	12
GO:0044236	multicellular organism metabolic process	13/511	133/16792	0.000743656	0.0122709	0.000947034	P2RX7, COL3A1, MMP10, CIITA, MMP8, CTSS, ADAMTS2, COL1A1, CYGB, COL5A1, GHR, MMP16, FAP	13
GO:0044259	multicellular organismal macromolecule metabolic process	12/511	115/16792	0.00075243	0.0123803	0.000955603	P2RX7, COL3A1, MMP10, CIITA, MMP8, CTSS, ADAMTS2, COL1A1, CYGB, COL5A1, MMP16, FAP	12
GO:0050878	regulation of body fluid levels	30/511	503/16792	0.000760172	0.0124723	0.000962819	APLN, EDNRB, IRF2, HPSE, GJA5, PDGFC, OXTR, UBASH3B, ABAT, SLC7A11, DGKG, VDR, IRF1, F2RL1, F2RL2, FAP, CD40, COL3A1, CEACAM1, DOCK9, PF4V1, SERPINB2, JAK2, P2RX7, A2M, PLSCR1, SYTL2, COL1A1, SERPING1, THBD	30
GO:0031295	T cell costimulation	10/511	81/16792	0.000767397	0.0125554	0.000969344	HLA-DPA1, HLA-DPB1, HLA-DQA1, HLA-DQB1, CD274, CD24, TNFSF13B, PDCD1LG2, TNFRSF14, HLA-DRA	10
GO:0044057	regulation of system process	30/511	504/16792	0.000784706	0.0128016	0.000986883	PDE4B, APLN, EDNRB, GJD3, GJA5, CLIC2, FBXO32, OXTR, ABAT, PDE5A, GLS, ICAM1, INHBA, NKX3-1, TGFB2, CXADR, ANK2, TMEM100, LMCD1, F2RL1, TENM4, CD38, CSRP3, BMP6, JAK2, HMOX1, DSP, KLF4, WASF3, PKP2	30
GO:0032846	positive regulation of homeostatic process	17/511	212/16792	0.000785505	0.0127794	0.000986883	APLN, EDNRB, CXCL10, ISG15, ACVR2A, CLIC2, ID2, ABAT, PML, INHBA, TGFB2, PKIB, P2RX7, VSNL1, CXCL9, LGALS9, CXCL11	17
GO:0031214	biomineral tissue development	13/511	134/16792	0.000794853	0.0128951	0.00099595	PTN, ISG15, ACVR2A, ANKH, RFLNB, BMP6, P2RX7, MGP, FAM20A, HACD1, COL1A1, GPNMB, TMEM119	13
GO:0031294	lymphocyte costimulation	10/511	82/16792	0.000839305	0.0135745	0.00104884	HLA-DPA1, HLA-DPB1, HLA-DQA1, HLA-DQB1, CD274, CD24, TNFSF13B, PDCD1LG2, TNFRSF14, HLA-DRA	10
GO:0001738	morphogenesis of a polarized epithelium	13/511	135/16792	0.000848961	0.0136923	0.00105807	DAAM1, FZD5, CTHRC1, FZD7, GPC6, ROR1, DACT1, PSME1, SFRP1, WNT5A, PSMB10, PSMB9, PSMB8	13
GO:1903707	negative regulation of hemopoiesis	13/511	136/16792	0.000906107	0.014568	0.00112629	HLA-G, LRRC17, HES1, UBASH3B, CEACAM1, ID2, SFRP1, CD74, INHBA, CDK6, DLL1, TLR3, IRF1	13
GO:0061448	connective tissue development	18/511	236/16792	0.000910992	0.0146064	0.00112936	RUNX2, CSF1, LRP6, RFLNB, ID2, GHR, ADAMTS12, WNT5A, BMP6, TGFB2, MGP, RXFP1, GPR4, COL1A1, NAMPT, ID4, COL5A1, CSGALNACT1	18
GO:2000106	regulation of leukocyte apoptotic process	10/511	83/16792	0.000916597	0.014656	0.0011333	TGFB2, P2RX7, CCL5, LGALS9, CD274, IDO1, CD74, WNT5A, IRF7, ICAM1	10
GO:0043410	positive regulation of MAPK cascade	29/511	485/16792	0.000922389	0.0147083	0.00113745	PDGFC, PDE5A, TNFRSF14, WNT5A, ICAM1, TGFB2, CCL5, LGALS9, CX3CL1, FZD7, CCL8, IGFBP3, CCL7, CXCR4, F2RL1, RASSF2, FZD5, PELI2, CD40, CD24, GHR, IL1A, TNFRSF1B, CD74, JAK2, P2RX7, TLR3, GPNMB, ACKR3	29
GO:0071216	cellular response to biotic stimulus	15/511	175/16792	0.00092926	0.0147774	0.00114291	PDE4B, CD40, EDNRB, FZD5, CXCL10, IL12A, TNFRSF1B, WNT5A, ICAM1, BMP6, CCL5, CMPK2, B2M, CXCL16, CXCL8	15
GO:0040013	negative regulation of locomotion	19/511	258/16792	0.000943897	0.0149683	0.00115787	COL3A1, PTN, IFITM1, BST2, CYGB, SFRP1, WNT5A, DPYSL3, PTPRR, HMOX1, CX3CL1, SEMA3F, SEMA5A, IGFBP3, KLF4, SEMA6D, PKP2, SPOCK3, TMEFF2	19
GO:0051271	negative regulation of cellular component movement	19/511	259/16792	0.000986445	0.0155964	0.00120689	COL3A1, PTN, IFITM1, BST2, CYGB, SFRP1, WNT5A, DPYSL3, PTPRR, HMOX1, CX3CL1, SEMA3F, SEMA5A, IGFBP3, KLF4, SEMA6D, PKP2, SPOCK3, TMEFF2	19
GO:0030593	neutrophil chemotaxis	10/511	84/16792	0.000999569	0.0157603	0.00121976	PDE4B, TGFB2, CCL5, CXADR, CAMK1D, CX3CL1, CCL8, CCL7, CD74, CXCL8	10
GO:1902578	single-organism localization	140/511	3614/16792	0.00108379	0.0170323	0.00131909	VAMP5, LRP6, HES1, CLIC2, CD274, OXTR, STEAP4, SLC7A11, PML, SFRP1, GLS, GLRB, NKX3-1, RBCK1, CCL5, CXADR, NUMA1, ANK2, APOL3, FZD7, CCL8, CTSS, F2RL1, SLC14A1, APOL1, PRSS12, CADM1, APOL2, AIM2, GSDMD, APOL4, APOL6, IL1A, SLC26A4, TSPAN13, JAK2, PMAIP1, P2RX7, A2M, SLC12A7, CDC42SE2, APLN, PDE4B, EDNRB, GJD3, ANKH, TAP2, TNFSF13B, ABAT, TAPBP, TAP1, SOCS1, TNFRSF14, SPARC, TGFB2, SERINC5, ANO4, …	140
GO:0000165	MAPK cascade	43/511	841/16792	0.00109009	0.0170852	0.00132331	PDGFC, OXTR, SHC3, PDE5A, SFRP1, TNFRSF14, WNT5A, ICAM1, TGFB2, PTPRR, CCL5, LGALS9, CX3CL1, FZD7, CCL8, CCL7, IGFBP3, CXCR4, F2RL1, PSMB10, PSMB9, RASSF2, FZD5, PELI2, CD40, IL31RA, GBP1, CD24, CEACAM1, GHR, PSME1, IL1A, TNFRSF1B, CD74, JAK2, PSMB8, P2RX7, TLR3, ATF3, KLF4, DACT1, GPNMB, ACKR3	43
GO:0033209	tumor necrosis factor-mediated signaling pathway	13/511	139/16792	0.00109711	0.017149	0.00132838	CD40, TNFRSF10D, AIM2, STAT1, TNFSF13B, PSME1, F2RL1, TNFRSF1B, TNFRSF14, PSMB10, JAK2, PSMB9, PSMB8	13
GO:0006875	cellular metal ion homeostasis	29/511	491/16792	0.00110774	0.0172682	0.00133778	EDNRB, CXCL10, PTGFR, LRP6, PTGER2, CLIC2, OXTR, UBASH3B, PML, CCL5, ANK2, VDR, CXCL11, CCL8, CCL7, CXCR4, F2RL1, F2RL2, CD40, CD24, CD38, CSRP3, JAK2, BMP6, P2RX7, CXCL9, HMOX1, GPR4, MCUB	29
GO:0042089	cytokine biosynthetic process	11/511	103/16792	0.00115304	0.0179213	0.00138533	HMOX1, TLR3, RNF128, NMI, KLF4, IRF1, IL1A, ASB1, WNT5A, IRF7, INHBA	11
GO:0071621	granulocyte chemotaxis	11/511	103/16792	0.00115304	0.0179213	0.00138533	PDE4B, TGFB2, CCL5, CSF1, CXADR, CAMK1D, CX3CL1, CCL8, CCL7, CD74, CXCL8	11
GO:1904951	positive regulation of establishment of protein localization	30/511	517/16792	0.00116818	0.0181071	0.00139992	SOX4, HES1, CD274, ABAT, MYRIP, TNFRSF14, WNT5A, TGFB2, RBCK1, VSNL1, LGALS9, POSTN, VEGFC, F2RL1, HLA-E, DDX58, FZD5, CADM1, AIM2, GSDMD, CD38, IL1A, CASP1, PMAIP1, BMP6, JAK2, P2RX7, TLR3, SEMA5A, DACT1	30
GO:0042107	cytokine metabolic process	11/511	105/16792	0.00133623	0.0206328	0.00159722	HMOX1, TLR3, RNF128, NMI, KLF4, IRF1, IL1A, ASB1, WNT5A, IRF7, INHBA	11
GO:0019220	regulation of phosphate metabolic process	71/511	1610/16792	0.00134987	0.0207872	0.00160941	CXCL10, LRP6, HES1, STAT2, UBASH3B, PML, SFRP1, ICAM1, INHBA, CAP2, NKX3-1, CCL5, LGALS9, FZD7, CCL8, CCL7, IGFBP3, CXCR4, F2RL1, PELI2, IL31RA, IL12A, BGN, CEACAM1, FLT3LG, IL1A, TNFRSF1B, CD74, VRK2, JAK2, P2RX7, FAM20A, CSRNP3, KLF4, DACT1, APLN, EDNRB, CSF1, PDGFC, HERC5, SOCS1, PDE5A, IL15, TNFRSF14, WNT5A, TGFB2, PTPRR, GUCY1A2, CDKN2B, CX3CL1, VEGFC, CXCL11, RASSF2, FZD5, CD40, PMEPA1, GBP…	71
GO:0051174	regulation of phosphorus metabolic process	71/511	1611/16792	0.00135849	0.0208644	0.00161556	CXCL10, LRP6, HES1, STAT2, UBASH3B, PML, SFRP1, ICAM1, INHBA, CAP2, NKX3-1, CCL5, LGALS9, FZD7, CCL8, CCL7, IGFBP3, CXCR4, F2RL1, PELI2, IL31RA, IL12A, BGN, CEACAM1, FLT3LG, IL1A, TNFRSF1B, CD74, VRK2, JAK2, P2RX7, FAM20A, CSRNP3, KLF4, DACT1, APLN, EDNRB, CSF1, PDGFC, HERC5, SOCS1, PDE5A, IL15, TNFRSF14, WNT5A, TGFB2, PTPRR, GUCY1A2, CDKN2B, CX3CL1, VEGFC, CXCL11, RASSF2, FZD5, CD40, PMEPA1, GBP…	71
GO:0009968	negative regulation of signal transduction	52/511	1089/16792	0.0013791	0.021123	0.00163393	IL18BP, LRP6, STAT1, CLIC2, RNF213, UBASH3B, TNFSF10, SFRP1, HHIP, ICAM1, NKX3-1, CCL5, CTHRC1, IGFBP3, SKIL, F2RL1, CXCL8, VNN1, BICD1, BGN, CEACAM1, IL1A, CD74, SOST, PSMB8, P2RX7, DACT1, KLF4, RUNX2, SOCS1, ADAMTS12, WNT5A, TGFB2, PTPRR, CX3CL1, MUC1, PSMB10, RASSF2, PSMB9, PMEPA1, GBP1, IL7, PSME1, DHX58, DEPTOR, HMOX1, TLR3, ATF3, IFI6, NLRC5, SFRP4, ACKR3	52
GO:0023014	signal transduction by protein phosphorylation	44/511	877/16792	0.00138093	0.0210963	0.00163393	PDGFC, OXTR, SHC3, PDE5A, SFRP1, TNFRSF14, WNT5A, ICAM1, TGFB2, PTPRR, CCL5, LGALS9, CX3CL1, FZD7, CCL8, CCL7, IGFBP3, CXCR4, F2RL1, PSMB10, PSMB9, RASSF2, FZD5, PELI2, CD40, IL31RA, GBP1, ACVR2A, CD24, CEACAM1, GHR, PSME1, IL1A, TNFRSF1B, CD74, JAK2, PSMB8, P2RX7, TLR3, ATF3, KLF4, DACT1, GPNMB, ACKR3	44
GO:0071347	cellular response to interleukin-1	10/511	88/16792	0.00139448	0.0212465	0.00164579	NKX3-1, CCL5, CX3CL1, CCL8, CCL7, IL1A, ADAMTS12, SFRP1, ICAM1, CXCL8	10
GO:0032844	regulation of homeostatic process	27/511	451/16792	0.00140034	0.0212802	0.00164855	APLN, EDNRB, CXCL10, GJA5, CLIC2, UBASH3B, ABAT, PML, INHBA, TGFB2, VSNL1, LGALS9, ANK2, CXCL11, ISG15, EPHA5, ACVR2A, ID2, CD38, CD74, PKIB, P2RX7, CXCL9, DLL1, CDK6, B2M, IFI6	27
GO:2001233	regulation of apoptotic signaling pathway	24/511	380/16792	0.00140592	0.0213095	0.00165096	VNN1, ACSL5, IL7, TNFSF10, PML, IL1A, CD74, SFRP1, ICAM1, INHBA, JAK2, PMAIP1, TGFB2, NKX3-1, RBCK1, DEPTOR, LGALS9, HMOX1, CX3CL1, ATF3, MUC1, IFI6, SKIL, ACKR3	24
GO:0044093	positive regulation of molecular function	79/511	1840/16792	0.00144185	0.0217928	0.00168891	ARHGEF26, LRP6, GCH1, HES1, CLIC2, TNFSF10, PML, SFRP1, ICAM1, NKX3-1, TRIM14, CAP2, CCL5, RBCK1, CTHRC1, LGALS9, ANK2, RHOC, CCL8, CCL7, IGFBP3, CTSS, NGEF, CXCR4, ARHGAP20, TBC1D1, AIM2, TRIM21, CASP1, CD74, JAK2, PMAIP1, PSMB8, A2M, P2RX7, FAM20A, PLSCR1, SUGT1, KLF4, DACT1, DOCK10, CSF1, PDGFC, SHC3, SOCS1, DENND1A, PDE5A, ITK, WNT5A, TGFB2, SERINC5, CAMK1D, CX3CL1, ARHGEF37, VDR, MMP16, RHEB…	79
GO:0007204	positive regulation of cytosolic calcium ion concentration	19/511	269/16792	0.00151274	0.0227947	0.00176751	EDNRB, CXCL10, PTGFR, LRP6, PTGER2, CD24, CLIC2, UBASH3B, OXTR, CD38, JAK2, P2RX7, CXCL9, ANK2, CXCL11, GPR4, CXCR4, F2RL1, F2RL2	19
GO:0050727	regulation of inflammatory response	21/511	314/16792	0.00154106	0.0231579	0.00179164	EDNRB, CASP4, IDO1, CD47, TNFRSF1B, ADAMTS12, CASP1, IL15, WNT5A, JAK2, C2, GBP5, A2M, CCL5, CX3CL1, TLR3, CCL8, CCL7, KLF4, SERPING1, CFB	21
GO:0070482	response to oxygen levels	21/511	314/16792	0.00154106	0.0231579	0.00179164	PTN, CD24, OXTR, CYGB, ABAT, PML, CD38, CASP1, SFRP1, ICAM1, PMAIP1, TGFB2, NKX3-1, VCAM1, HMOX1, POSTN, VEGFC, MUC1, COL1A1, CXCR4, MGARP	21
GO:0050851	antigen receptor-mediated signaling pathway	17/511	228/16792	0.00167283	0.0250513	0.00194002	PDE4B, HLA-DPA1, HLA-DPB1, HLA-DQA1, GBP1, HLA-DQB1, BTN3A1, CEACAM1, PSME1, CD38, ITK, PSMB8, RBCK1, THEMIS2, PSMB10, HLA-DRA, PSMB9	17
GO:0006468	protein phosphorylation	79/511	1852/16792	0.00171163	0.0255607	0.0019801	CXCL10, LRP6, HES1, UBASH3B, OXTR, ALPK1, PML, SFRP1, ICAM1, INHBA, CUX1, NKX3-1, CCL5, LGALS9, FZD7, CCL8, CCL7, IGFBP3, CXCR4, F2RL1, MEX3B, IL12RB1, PELI2, IL31RA, IL12A, BGN, CEACAM1, FLT3LG, IL1A, TNFRSF1B, CD74, VRK2, JAK2, PSMB8, P2RX7, FAM20A, KLF4, DACT1, EDNRB, CSF1, PDGFC, HERC5, SHC3, SOCS1, PDE5A, ITK, IL15, TNFRSF14, WNT5A, TGFB2, PTPRR, CDKN2B, CAMK1D, CX3CL1, VEGFC, MLKL, PSMB10, …	79
GO:0010648	negative regulation of cell communication	55/511	1182/16792	0.00175119	0.0260786	0.00201726	IL18BP, LRP6, STAT1, CLIC2, RNF213, UBASH3B, TNFSF10, SFRP1, HHIP, ICAM1, INHBA, NKX3-1, VSNL1, CCL5, CTHRC1, IGFBP3, F2RL1, SKIL, CXCL8, VNN1, BICD1, BGN, CEACAM1, IL1A, CD74, SOST, PSMB8, P2RX7, DACT1, KLF4, RUNX2, SOCS1, ADAMTS12, WNT5A, TGFB2, PTPRR, CX3CL1, MUC1, PSMB10, RASSF2, PSMB9, PMEPA1, GBP1, IL7, PSME1, DHX58, CD38, DEPTOR, HMOX1, TLR3, ATF3, IFI6, NLRC5, SFRP4, ACKR3	55
GO:0045937	positive regulation of phosphate metabolic process	50/511	1049/16792	0.00176056	0.0261508	0.00201726	CXCL10, HES1, ICAM1, INHBA, CAP2, NKX3-1, CCL5, LGALS9, FZD7, CCL8, IGFBP3, CCL7, CXCR4, F2RL1, PELI2, IL31RA, IL12A, FLT3LG, IL1A, TNFRSF1B, CD74, JAK2, P2RX7, FAM20A, APLN, EDNRB, CSF1, PDGFC, SOCS1, PDE5A, TNFRSF14, IL15, WNT5A, TGFB2, GUCY1A2, CX3CL1, CXCL11, VEGFC, RASSF2, CD40, FZD5, ACVR2A, CD24, GHR, BMP6, CXCL9, TLR3, CCND2, GPNMB, ACKR3	50
GO:0010562	positive regulation of phosphorus metabolic process	50/511	1049/16792	0.00176056	0.0261508	0.00201726	CXCL10, HES1, ICAM1, INHBA, CAP2, NKX3-1, CCL5, LGALS9, FZD7, CCL8, IGFBP3, CCL7, CXCR4, F2RL1, PELI2, IL31RA, IL12A, FLT3LG, IL1A, TNFRSF1B, CD74, JAK2, P2RX7, FAM20A, APLN, EDNRB, CSF1, PDGFC, SOCS1, PDE5A, TNFRSF14, IL15, WNT5A, TGFB2, GUCY1A2, CX3CL1, CXCL11, VEGFC, RASSF2, CD40, FZD5, ACVR2A, CD24, GHR, BMP6, CXCL9, TLR3, CCND2, GPNMB, ACKR3	50
GO:0036293	response to decreased oxygen levels	20/511	295/16792	0.00176101	0.026092	0.00201726	PTN, CD24, OXTR, CYGB, ABAT, PML, CD38, CASP1, SFRP1, ICAM1, PMAIP1, TGFB2, NKX3-1, VCAM1, HMOX1, POSTN, VEGFC, MUC1, CXCR4, MGARP	20
GO:0051179	localization	211/511	5872/16792	0.00181482	0.0268123	0.00207382	STAT1, HES1, CLIC2, CD274, PARVA, SLC7A11, PML, NRCAM, CCL5, RBCK1, APOL3, FZD7, ZMAT3, CCL8, IGFBP3, CCL7, APOL2, APOL4, APOL6, TSPAN13, JAK2, PMAIP1, A2M, DLL1, MX2, SLC12A7, APLN, CSF1, GJD3, TAP2, ABAT, TAPBP, TAP1, TNFRSF14, TGFB2, SERINC5, CX3CL1, ANO4, CXCL5, GPC6, CXCL11, CXCL6, SLC15A3, IMMP1L, PTN, CD24, CSRP3, C2, GBP5, PARP10, DSP, SDC2, TRAPPC3L, PLA2G12A, SERPING1, SLC26A2, THBD, CX…	211
GO:0023057	negative regulation of signaling	55/511	1186/16792	0.00183372	0.0270205	0.0020903	IL18BP, LRP6, STAT1, CLIC2, RNF213, UBASH3B, TNFSF10, SFRP1, HHIP, ICAM1, INHBA, NKX3-1, VSNL1, CCL5, CTHRC1, IGFBP3, F2RL1, SKIL, CXCL8, VNN1, BICD1, BGN, CEACAM1, IL1A, CD74, SOST, PSMB8, P2RX7, DACT1, KLF4, RUNX2, SOCS1, ADAMTS12, WNT5A, TGFB2, PTPRR, CX3CL1, MUC1, PSMB10, RASSF2, PSMB9, PMEPA1, GBP1, IL7, PSME1, DHX58, CD38, DEPTOR, HMOX1, TLR3, ATF3, IFI6, NLRC5, SFRP4, ACKR3	55
GO:0031668	cellular response to extracellular stimulus	15/511	188/16792	0.00184245	0.0270804	0.00209515	PTN, GSDMD, TNC, IL15, SFRP1, ICAM1, PMAIP1, P2RX7, HMOX1, CDKN2B, VDR, ATF3, POSTN, COL1A1, CADPS2	15
GO:0001934	positive regulation of protein phosphorylation	44/511	890/16792	0.00185062	0.0271316	0.00209933	EDNRB, CSF1, HES1, PDGFC, SOCS1, PDE5A, IL15, TNFRSF14, WNT5A, ICAM1, INHBA, TGFB2, NKX3-1, CCL5, LGALS9, CX3CL1, FZD7, CCL8, VEGFC, CCL7, IGFBP3, CXCR4, F2RL1, RASSF2, FZD5, PELI2, CD40, IL31RA, IL12A, ACVR2A, CD24, GHR, FLT3LG, IL1A, TNFRSF1B, CD74, JAK2, BMP6, P2RX7, FAM20A, TLR3, CCND2, GPNMB, ACKR3	44
GO:0045667	regulation of osteoblast differentiation	11/511	110/16792	0.00189951	0.0277703	0.00214956	RUNX2, CTHRC1, CDK6, IFITM1, ACVR2A, ID4, ID2, SFRP1, TMEM119, RASSF2, BMP6	11
GO:0019886	antigen processing and presentation of exogenous peptide antigen via MHC class II	10/511	92/16792	0.00190623	0.0277989	0.00215197	HLA-DPA1, HLA-DOA, HLA-DPB1, HLA-DQA1, HLA-DQB1, CTSS, HLA-DMB, HLA-DMA, CD74, HLA-DRA	10
GO:0006508	proteolysis	73/511	1693/16792	0.00202777	0.0294742	0.00228366	CASP10, RNF19B, CLN8, RNF114, PAPPA, RNF128, BST2, RNF213, CARD16, UBE2L6, TNFSF10, PML, SFRP1, NKX3-1, RBCK1, LGALS9, CTSS, ADAMTS2, FAP, PRSS12, ISG15, MMP10, AIM2, RHBDF2, MMP8, TRIM21, CASP4, NUB1, CASP1, TNFRSF1B, LAP3, SVIP, HECW2, JAK2, PMAIP1, PSMB8, A2M, P2RX7, KLF4, CTSO, LXN, ERAP2, SPOCK3, FGL2, FBXO32, HERC5, ERAP1, ADAMTS12, ADAM12, HERC6, WDR20, LNX1, MMP16, CFB, PSMB10, USP18, TEN…	73
GO:0050678	regulation of epithelial cell proliferation	20/511	300/16792	0.00213134	0.030882	0.0023931	EDNRB, PTN, HES1, STAT1, CEACAM1, SFRP1, WNT5A, SPARC, EGR3, BMP6, NKX3-1, TGFB2, CCL5, CDK6, CDKN2B, SEMA5A, FZD7, VDR, VEGFC, SIX4	20
GO:0045637	regulation of myeloid cell differentiation	15/511	191/16792	0.0021352	0.0308617	0.0023931	CSF1, ISG15, LRRC17, ACVR2A, UBASH3B, CEACAM1, ID2, SFRP1, INHBA, CDK6, DLL1, TLR3, RBP1, IRF7, RASSF2	15
GO:0007259	JAK-STAT cascade	14/511	171/16792	0.00220502	0.0317783	0.00246545	CD40, IL31RA, HES1, STAT1, IL12A, STAT2, BGN, GHR, IL15RA, SOCS1, IL15, JAK2, CCL5, NMI	14
GO:0050673	epithelial cell proliferation	22/511	347/16792	0.00221843	0.0318912	0.00247452	PTN, ACVR2A, STAT1, CEACAM1, ID2, SFRP1, WNT5A, SPARC, EGR3, BMP6, NKX3-1, TGFB2, CCL5, CDK6, HMOX1, CDKN2B, SEMA5A, FZD7, VDR, VEGFC, IGFBP3, FAP	22
GO:0031401	positive regulation of protein modification process	53/511	1143/16792	0.00226181	0.0324268	0.00251691	SOX4, HES1, PML, ICAM1, INHBA, NKX3-1, CCL5, LGALS9, FZD7, CCL8, IGFBP3, CCL7, CXCR4, F2RL1, PELI2, IL31RA, IL12A, FLT3LG, IL1A, TNFRSF1B, CD74, SVIP, PSMB8, JAK2, P2RX7, FAM20A, NMI, EDNRB, CSF1, PDGFC, SOCS1, PDE5A, TNFRSF14, IL15, WNT5A, TGFB2, CX3CL1, VEGFC, MUC1, PSMB10, RASSF2, PSMB9, FZD5, CD40, ACVR2A, CD24, GHR, PSME1, BMP6, TLR3, CCND2, GPNMB, ACKR3	53
GO:0007050	cell cycle arrest	17/511	235/16792	0.00227494	0.0325335	0.0025255	GAS2, IL12A, SOX4, JMY, ID2, PML, UHMK1, INHBA, TGFB2, NKX3-1, CDK6, CDKN2B, MUC1, IRF1, SKIL, FAP, CXCL8	17
GO:0007249	I-kappaB kinase/NF-kappaB signaling	18/511	257/16792	0.0022813	0.0325445	0.00252656	CASP10, CD40, PELI2, STAT1, BST2, TNFSF10, ZC3HAV1, IL1A, CASP1, RBCK1, HMOX1, LGALS9, RHOC, APOL3, TLR3, F2RL1, AZI2, SECTM1	18
GO:0031325	positive regulation of cellular metabolic process	112/511	2839/16792	0.00230866	0.0328499	0.00255082	LRP6, GSAP, RNF128, STAT1, HES1, TNFSF10, PML, SFRP1, CAP2, NKX3-1, CCL5, FZD7, CCL8, CCL7, IGFBP3, NAMPT, F2RL1, PELI2, IL31RA, AIM2, FLT3LG, IL1A, SVIP, JAK2, PMAIP1, P2RX7, DLL1, PLSCR1, CSRNP3, ID4, COL1A1, CAND2, APLN, EDNRB, CSF1, PDGFC, ABAT, SOCS1, PDE5A, TNFRSF14, TGFB2, GUCY1A2, CX3CL1, VDR, VEGFC, CXCL11, NFYA, MUC1, SIX4, HELZ2, DDX58, PSMB10, PSMB9, RASSF2, ACVR2A, CD24, GTPBP1, CSRP…	112
GO:0045580	regulation of T cell differentiation	11/511	113/16792	0.0023205	0.0329368	0.00255785	IL12RB1, HLA-DOA, LGALS9, HLA-G, VNN1, IL12A, IL7, IRF1, IL15, CD74, EGR3	11
GO:0052548	regulation of endopeptidase activity	23/511	372/16792	0.00234638	0.0332189	0.00257926	ANOS1, AIM2, BST2, CARD16, PSME1, TNFSF10, PML, CASP1, PMAIP1, JAK2, SERPINB2, PSMB8, NKX3-1, A2M, LGALS9, CYCS, IFI27, KLF4, IFI6, SERPING1, LXN, SPOCK3, PSMB9	23
GO:0051048	negative regulation of secretion	15/511	193/16792	0.00235096	0.0332035	0.00257926	STXBP6, VSNL1, LGALS9, HMOX1, GBP1, RHBDF2, OXTR, CEACAM1, ABAT, F2RL1, PML, CD74, SFRP1, RSAD2, INHBA	15
GO:0051090	regulation of sequence-specific DNA binding transcription factor activity	23/511	373/16792	0.00242453	0.0341444	0.00265374	CD40, LRP6, FOXS1, EPHA5, AIM2, TRIM21, JMY, ID2, WNT5A, ICAM1, JAK2, TRIM14, RBCK1, PARP10, LGALS9, HMOX1, CAMK1D, TLR3, KLF4, NLRC5, SFRP4, RHEBL1, DDX58	23
GO:0042327	positive regulation of phosphorylation	45/511	932/16792	0.00249332	0.0350142	0.00272266	APLN, EDNRB, CSF1, HES1, PDGFC, SOCS1, PDE5A, IL15, TNFRSF14, WNT5A, ICAM1, INHBA, TGFB2, NKX3-1, CCL5, LGALS9, CX3CL1, FZD7, CCL8, VEGFC, CCL7, IGFBP3, CXCR4, F2RL1, RASSF2, FZD5, PELI2, CD40, IL31RA, IL12A, ACVR2A, CD24, GHR, FLT3LG, IL1A, TNFRSF1B, CD74, JAK2, BMP6, P2RX7, FAM20A, TLR3, CCND2, GPNMB, ACKR3	45
GO:0050730	regulation of peptidyl-tyrosine phosphorylation	16/511	216/16792	0.00254987	0.0357105	0.00277793	CD40, IL31RA, IL12A, HES1, CD24, PDGFC, GHR, SOCS1, IL15, SFRP1, CD74, TNFRSF14, ICAM1, JAK2, CCL5, VEGFC	16
GO:0002495	antigen processing and presentation of peptide antigen via MHC class II	10/511	96/16792	0.00255801	0.0357382	0.00278031	HLA-DPA1, HLA-DOA, HLA-DPB1, HLA-DQA1, HLA-DQB1, CTSS, HLA-DMB, HLA-DMA, CD74, HLA-DRA	10
GO:0043122	regulation of I-kappaB kinase/NF-kappaB signaling	17/511	238/16792	0.00258268	0.0359923	0.00279601	CASP10, CD40, PELI2, STAT1, BST2, TNFSF10, ZC3HAV1, IL1A, CASP1, RBCK1, HMOX1, LGALS9, RHOC, APOL3, TLR3, F2RL1, SECTM1	17
GO:0001649	osteoblast differentiation	15/511	195/16792	0.00258442	0.0359316	0.00279601	RUNX2, IFITM1, LRRC17, ACVR2A, TNC, ID2, SFRP1, BMP6, CTHRC1, CDK6, IGFBP3, ID4, COL1A1, GPNMB, TMEM119	15
GO:0022612	gland morphogenesis	11/511	115/16792	0.00264059	0.0366134	0.00285018	TGFB2, NKX3-1, CSF1, PTN, VDR, ID4, TNC, CEACAM1, PML, SFRP1, WNT5A	11
GO:0033002	muscle cell proliferation	13/511	155/16792	0.00276577	0.0382285	0.00297842	IL12A, STAT1, ID2, MEGF10, IL15, JAK2, TGFB2, CCL5, HMOX1, IGFBP3, NAMPT, KLF4, TENM4	13
GO:0030003	cellular cation homeostasis	31/511	573/16792	0.00277682	0.0382893	0.00298345	EDNRB, CXCL10, PTGFR, LRP6, PTGER2, CLIC2, OXTR, UBASH3B, PML, CCL5, ANK2, VDR, CXCL11, CCL8, CCL7, CXCR4, F2RL1, F2RL2, CD40, CD24, CD38, SLC26A4, CSRP3, JAK2, BMP6, P2RX7, CXCL9, HMOX1, GPR4, MCUB, SLC26A2	31
GO:0044092	negative regulation of molecular function	51/511	1100/16792	0.00281499	0.038716	0.00301752	LRP6, BST2, CLIC2, CARD16, UBASH3B, ZC3HAV1, PML, SFRP1, IFIT1, NKX3-1, RBCK1, IFIT2, AIM2, TRIM21, BICD1, BGN, ID2, CEACAM1, JAK2, PSMB8, A2M, CSRNP3, SUGT1, DACT1, KLF4, LXN, SPOCK3, EDNRB, SOCS1, TGFB2, CDKN2B, PTPRN2, PSMB10, PSMB9, ANOS1, PTN, FOXS1, IL7, PSME1, SERPINB2, PKIB, PARP10, HMOX1, DEPTOR, SYTL2, IQGAP2, B2M, IFI6, SERPING1, NLRC5, SFRP4	51
GO:0097696	STAT cascade	14/511	176/16792	0.00283707	0.038924	0.00303423	CD40, IL31RA, HES1, STAT1, IL12A, STAT2, BGN, GHR, IL15RA, SOCS1, IL15, JAK2, CCL5, NMI	14
GO:0048878	chemical homeostasis	49/511	1049/16792	0.00294051	0.0402232	0.00313171	EDNRB, CXCL10, PTGFR, LRP6, PTGER2, GJA5, STAT1, SOX4, CLIC2, TAP2, UBASH3B, OXTR, TAP1, STEAP4, PML, ICAM1, IFIT1, VSNL1, CCL5, ANK2, VDR, CCL8, CXCL11, CCL7, PTPRN2, CXCR4, F2RL1, F2RL2, CD40, CD24, SLC26A4, CD38, SCN7A, JAK2, BMP6, CSRP3, P2RX7, CXCL9, OAS1, HMOX1, FAM20A, GPR4, SLC25A28, IFI6, B2M, PKP2, MCUB, SFRP4, SLC26A2	49
GO:0042035	regulation of cytokine biosynthetic process	10/511	98/16792	0.00294423	0.0401806	0.00313171	HMOX1, TLR3, RNF128, NMI, KLF4, IRF1, IL1A, ASB1, WNT5A, INHBA	10
GO:0001666	response to hypoxia	19/511	286/16792	0.00294832	0.040143	0.00313171	PTN, CD24, CYGB, ABAT, PML, CD38, CASP1, SFRP1, ICAM1, PMAIP1, TGFB2, NKX3-1, VCAM1, HMOX1, POSTN, VEGFC, MUC1, CXCR4, MGARP	19
GO:0050729	positive regulation of inflammatory response	11/511	117/16792	0.00299508	0.0406742	0.00317417	GBP5, CCL5, CX3CL1, TLR3, CCL8, CCL7, IDO1, CD47, IL15, WNT5A, JAK2	11
GO:0050790	regulation of catalytic activity	95/511	2357/16792	0.00301635	0.0408639	0.00318947	ARHGEF26, CXCL10, LRP6, GCH1, BST2, UBASH3B, CARD16, TNFSF10, PML, SFRP1, ICAM1, NKX3-1, IFIT1, CAP2, CCL5, LGALS9, RHOC, CCL8, CCL7, IGFBP3, NGEF, CXCR4, ARHGAP20, TBC1D1, AIM2, BICD1, BGN, CYGB, CEACAM1, CASP1, CD74, JAK2, PMAIP1, PSMB8, PPP1R3C, A2M, P2RX7, OAS1, FAM20A, PLSCR1, CSRNP3, SUGT1, KLF4, LXN, DOCK10, SPOCK3, EDNRB, CSF1, PDGFC, HERC5, SHC3, SOCS1, DENND1A, PDE5A, ITK, WNT5A, TGFB2,…	95
GO:0002504	antigen processing and presentation of peptide or polysaccharide antigen via MHC class II	10/511	99/16792	0.00315386	0.0425923	0.00332735	HLA-DPA1, HLA-DOA, HLA-DPB1, HLA-DQA1, HLA-DQB1, CTSS, HLA-DMB, HLA-DMA, CD74, HLA-DRA	10
GO:0050680	negative regulation of epithelial cell proliferation	11/511	118/16792	0.00318603	0.0429203	0.00335371	TGFB2, NKX3-1, CDKN2B, CDK6, PTN, VDR, STAT1, CEACAM1, SFRP1, WNT5A, SPARC	11
GO:0002526	acute inflammatory response	12/511	138/16792	0.0032683	0.043906	0.00343258	C2, EDNRB, VCAM1, A2M, PLSCR1, IL31RA, APOL2, VNN1, SERPING1, IL1A, CFB, ICAM1	12
GO:0010810	regulation of cell-substrate adhesion	14/511	179/16792	0.00328253	0.0439937	0.0034398	COL16A1, CSF1, CDK6, HACD1, PTN, GBP1, FZD7, POSTN, VEGFC, COL1A1, PLEKHA2, ABI3BP, SFRP1, JAK2	14
GO:0009893	positive regulation of metabolic process	118/511	3052/16792	0.00338515	0.0452375	0.0035394	PTGFR, LRP6, GCH1, GSAP, RNF128, STAT1, HES1, TNFSF10, PML, SFRP1, CAP2, NKX3-1, CCL5, ANK2, FZD7, CCL8, CCL7, IGFBP3, NAMPT, F2RL1, PELI2, IL31RA, AIM2, FLT3LG, IL1A, SVIP, JAK2, PMAIP1, P2RX7, DLL1, PLSCR1, CSRNP3, ID4, COL1A1, CAND2, APLN, EDNRB, CSF1, PDGFC, ABAT, SOCS1, PDE5A, TNFRSF14, TGFB2, GUCY1A2, CX3CL1, VDR, VEGFC, CXCL11, NFYA, MUC1, SIX4, HELZ2, DDX58, PSMB10, PSMB9, RASSF2, ACVR2A,…	118
GO:0031669	cellular response to nutrient levels	13/511	159/16792	0.00340745	0.045427	0.00354685	PTN, TNC, SFRP1, IL15, PMAIP1, ICAM1, CDKN2B, HMOX1, VDR, ATF3, POSTN, COL1A1, CADPS2	13
GO:0043902	positive regulation of multi-organism process	13/511	159/16792	0.00340745	0.045427	0.00354685	EDNRB, TRIM21, OXTR, ZC3HAV1, DHX58, PDE5A, BMP6, INHBA, IFIT1, CCL5, LGALS9, DDX60, F2RL1	13
GO:0051480	regulation of cytosolic calcium ion concentration	19/511	292/16792	0.00367186	0.0487614	0.00381358	EDNRB, CXCL10, PTGFR, LRP6, PTGER2, CD24, CLIC2, UBASH3B, OXTR, CD38, JAK2, P2RX7, CXCL9, ANK2, CXCL11, GPR4, CXCR4, F2RL1, F2RL2	19
GO:0009991	response to extracellular stimulus	25/511	435/16792	0.00372011	0.0492771	0.00385513	CXCL10, STAT1, IL15RA, IL15, SFRP1, SPARC, ICAM1, CDKN2B, VDR, POSTN, RBP1, SLC22A3, PTN, GSDMD, TNC, GHR, PMAIP1, C2, VCAM1, P2RX7, HMOX1, KYNU, ATF3, COL1A1, CADPS2	25
